# Supplementary material for: InTraSeq: A Multimodal Assay that Uncovers New Single-Cell Biology and Regulatory Mechanisms
Source: Research Square preprint supplement (doi:10.21203/rs.3.rs-5284652/v1), 2024-12-09
Supplement: Supplementary file 1 [file 1914dc0166872adc838a99f4.xlsx]

## Sheet: Sheet 1
	0min_naive	10min_Th0	45min_Th0	6h_Th0	24h_Th0	10min_npTh17	45min_npTh17	6h_npTh17	24h_npTh17	10min_pTh17	45min_pTh17	6h_pTh17	24h_pTh17	10min_PMA/IO	45min_PMA/IO
Number_of_cells	11329	5342	4920	4838	5109	5753	5195	4243	5142	5494	4423	5619	6811	4599	4955
Average_RNA_UMIs_per_cell	2760.47	2465.71	2614.93	3343.27	5177.04	4574.49	2664.58	4123.85	5704.18	2832.9	2999.28	3531.5	6398.85	3715.33	2618.97
Median_RNA_UMIs_per_cell	2424	2267	2402.5	3018	4257	3995	2505	3895	5143.5	2539	2866	3176	5289	3219	2388
1st_Quartile_RNA_UMIs_per_cell.25%	1987	1938	2008.75	2372.25	2849	3386	2090.5	3058.5	3255.75	2180.25	2282	2456	2898.5	2762	1969
3rd_Quartile_RNA_UMIs_per_cell.75%	3093	2697.75	2967.25	3965	6890	5019	3052	4917.5	7667.75	3090	3553.5	4116.5	8931	3956.5	2971.5
Total_genes_detected	18952	17293	16577	16727	18635	19236	16879	16983	18433	17792	17580	17442	19329	18161	17666
Average_genes_per_cell	1328.97	1241.4	1217.91	1558.37	1934.38	1960.02	1187.13	1812.51	2047.93	1425.12	1356.09	1602.1	2042.35	1710.86	1153.89
Median_genes_per_cell	1223	1173	1155	1472	1746	1807	1140	1768	1969	1326	1322	1509	1900	1564	1096
1st_Quartile_genes_per_cell.25%	1058	1046.25	1002	1233	1328	1615	997	1496	1401	1188.25	1132	1257.5	1270	1402.5	944
3rd_Quartile_genes_per_cell.75%	1458	1333	1359	1796	2437	2112	1323	2073.5	2619.75	1528	1551	1826.5	2733.5	1817	1286
Average_ADT_UMIs_per_cell	792.227	972.297	733.588	794.614	893.261	885.311	899.906	978.984	544.389	818.281	917.289	1067.17	577.99	1373.2	707.405
Median_ADT_UMIs_per_cell	653	888	658	700.5	822	772	827	907	514	739	846	948	550	1208	640
1st_Quartile_ADT_UMIs_per_cell.25%	470	732	498	544	644	563	666	732	394	592.25	650	766	372	966	513
3rd_Quartile_ADT_UMIs_per_cell.75%	989	1117	896	943	1077	1098	1053.5	1152	660	956	1133	1242.5	753	1580.5	828
Total_proteins_detected	31	31	31	31	31	31	31	31	31	31	31	31	31	31	31
Average_proteins_per_cell	28.2365	28.6621	28.5136	28.5118	29.0438	29.3188	28.6833	28.4615	28.978	29.2312	25.6487	29.3239	28.0169	29.6125	27.3792
Median_proteins_per_cell	28	29	29	29	29	29	29	29	29	29	26	29	29	30	28
1st_Quartile_proteins_per_cell.25%	27	28	28	28	28	29	28	28	28	28	24	29	27	29	26
3rd_Quartile_proteins_per_cell.75%	29	29	29	29	30	30	30	30	30	30	27	30	30	30	29
