# Supplementary material for: InTraSeq: A Multimodal Assay that Uncovers New Single-Cell Biology and Regulatory Mechanisms
Source: Research Square preprint supplement (doi:10.21203/rs.3.rs-5284652/v1), 2024-12-09
Supplement: Supplementary file 2 [file 1d47dc1b319fed82d48d0fb8.xlsx]

## Sheet: Sheet 1
protein	cluster	p_val	avg_log2FC	pct.1	pct.2	p_val_adj
CD19	B cell	2.40146e-215	1.48047	1	0.996	8.88542e-214
Aiolos	B cell	1.12557e-162	0.978584	1	0.993	4.1646e-161
FOXO1	B cell	2.94621e-142	0.604881	1	1	1.0901e-140
Vimentin	B cell	6.63839e-122	-0.656152	1	1	2.4562e-120
CREB-1	B cell	3.18131e-121	0.24037	1	1	1.17708e-119
H3K27me3	B cell	2.70791e-112	0.331913	1	1	1.00193e-110
Histone H3	B cell	1.17257e-84	0.183354	1	1	4.33851e-83
CD3	B cell	1.12354e-77	-1.55597	0.992	0.998	4.15712e-76
p-CREB-1-Ser133	B cell	4.05682e-33	0.242349	1	1	1.50102e-31
NFAT1	B cell	8.199e-28	-0.169271	1	1	3.03363e-26
CD4	B cell	1.72971e-22	-1.11353	0.981	0.991	6.39991e-21
p-STAT3-Ser727	B cell	2.81012e-21	-0.550694	0.804	0.934	1.03974e-19
CD8	B cell	9.89645e-21	-1.52487	0.966	0.978	3.66169e-19
TCF-7	B cell	8.31167e-12	-0.205297	1	1	3.07532e-10
p-MAPK-ERK1/2-Thr202/Tyr204	B cell	6.57846e-11	0.257411	0.995	0.993	2.43403e-09
Ikaros	B cell	3.97586e-09	0.127058	1	1	1.47107e-07
p-4E-BP1-Thr37/46	B cell	6.11336e-06	0.160273	0.992	0.995	0.000226194
p-Akt-Ser473	B cell	0.000560417	0.118423	1	0.998	0.0207354
S100A9	B cell	0.00111873	-0.25701	1	1	0.0413932
p-STAT3-Tyr705	B cell	0.00296858	-0.230272	0.992	0.998	0.109837
CD4	CD4+ naïve/stem-like T cell	4.41701e-278	1.42897	0.997	0.989	1.63429e-276
TCF-7	CD4+ naïve/stem-like T cell	1.1098e-253	0.544692	0.999	1	4.10627e-252
CD3	CD4+ naïve/stem-like T cell	2.19278e-149	0.747425	1	0.997	8.11328e-148
p-CREB-1-Ser133	CD4+ naïve/stem-like T cell	8.89684e-144	-0.458789	0.999	1	3.29183e-142
p-H3-Ser10	CD4+ naïve/stem-like T cell	1.70699e-141	-0.936879	0.987	0.998	6.31587e-140
p-S6-Ser235/236	CD4+ naïve/stem-like T cell	1.23827e-97	-0.526755	0.999	1	4.58159e-96
TBX21	CD4+ naïve/stem-like T cell	8.11595e-94	-0.552454	0.999	1	3.0029e-92
p-STAT3-Ser727	CD4+ naïve/stem-like T cell	2.54219e-90	0.75205	0.963	0.917	9.40609e-89
NF-κB	CD4+ naïve/stem-like T cell	4.92073e-89	0.118667	0.999	1	1.82067e-87
FOXO1	CD4+ naïve/stem-like T cell	4.00337e-72	0.216005	0.999	1	1.48125e-70
CD8	CD4+ naïve/stem-like T cell	8.54156e-70	-1.07075	0.945	0.985	3.16038e-68
GR	CD4+ naïve/stem-like T cell	1.82547e-60	-0.21788	0.998	1	6.75424e-59
H3K27me3	CD4+ naïve/stem-like T cell	2.33022e-59	0.169649	0.999	1	8.62183e-58
Aiolos	CD4+ naïve/stem-like T cell	2.49305e-57	-0.459003	0.998	0.992	9.22428e-56
NCAM1	CD4+ naïve/stem-like T cell	1.27189e-44	-0.9902	0.99	0.996	4.70598e-43
MAPK-ERK1/2	CD4+ naïve/stem-like T cell	3.35769e-42	-0.119089	0.999	1	1.24235e-40
S6	CD4+ naïve/stem-like T cell	5.48184e-41	-0.103524	0.999	1	2.02828e-39
STAT1	CD4+ naïve/stem-like T cell	9.13423e-32	0.101116	0.999	1	3.37967e-30
AIF-1	CD4+ naïve/stem-like T cell	3.7862e-17	-0.831028	0.459	0.583	1.40089e-15
p-4E-BP1-Thr37/46	CD4+ naïve/stem-like T cell	4.04682e-16	-0.181719	0.987	0.997	1.49732e-14
p-GR-Ser226	CD4+ naïve/stem-like T cell	1.99659e-13	-0.168929	0.996	0.999	7.38738e-12
Ikaros	CD4+ naïve/stem-like T cell	6.9292e-13	0.108206	0.999	1	2.5638e-11
CD68	CD4+ naïve/stem-like T cell	2.1633e-12	-0.656557	0.999	1	8.00423e-11
S100A9	CD4+ naïve/stem-like T cell	8.15051e-10	-0.506306	0.999	1	3.01569e-08
p-NF-κB-Ser536	CD4+ naïve/stem-like T cell	2.38168e-09	-0.114277	0.999	1	8.81221e-08
p-STAT3-Tyr705	CD4+ naïve/stem-like T cell	9.94394e-09	-0.302002	0.996	0.998	3.67926e-07
CD19	CD4+ naïve/stem-like T cell	3.13908e-08	-0.21565	0.999	0.996	1.16146e-06
CD4	CD4+ effector/memory T cell	1.83726e-165	1.34811	0.998	0.989	6.79788e-164
Vimentin	CD4+ effector/memory T cell	1.65762e-75	0.327982	1	1	6.13321e-74
NF-κB	CD4+ effector/memory T cell	1.16e-73	0.141513	1	1	4.29198e-72
CD3	CD4+ effector/memory T cell	2.46886e-63	0.638185	1	0.998	9.13477e-62
GR	CD4+ effector/memory T cell	2.37434e-61	-0.296171	1	1	8.78506e-60
p-H3-Ser10	CD4+ effector/memory T cell	1.14401e-58	-0.79546	0.996	0.996	4.23282e-57
p-GR-Ser226	CD4+ effector/memory T cell	3.35009e-54	-0.414084	0.998	0.999	1.23953e-52
STAT1	CD4+ effector/memory T cell	4.41461e-46	0.227948	1	1	1.6334e-44
TCF-7	CD4+ effector/memory T cell	1.71323e-45	0.296642	1	1	6.33894e-44
CD8	CD4+ effector/memory T cell	2.48063e-42	-1.54075	0.963	0.979	9.17832e-41
p-CREB-1-Ser133	CD4+ effector/memory T cell	2.29589e-41	-0.330328	1	1	8.49481e-40
Aiolos	CD4+ effector/memory T cell	3.33831e-41	-0.508569	0.996	0.993	1.23518e-39
NCAM1	CD4+ effector/memory T cell	1.75941e-37	-1.05804	0.996	0.994	6.50983e-36
p-NF-κB-Ser536	CD4+ effector/memory T cell	5.00689e-30	0.298753	1	1	1.85255e-28
H3K27Ac	CD4+ effector/memory T cell	7.07607e-26	-0.100241	1	1	2.61815e-24
p-S6-Ser235/236	CD4+ effector/memory T cell	2.0768e-23	-0.347848	1	1	7.68417e-22
TBX21	CD4+ effector/memory T cell	1.06141e-19	-0.351568	1	1	3.92721e-18
FOXO1	CD4+ effector/memory T cell	1.00039e-17	0.135606	1	1	3.70146e-16
p-Akt-Ser473	CD4+ effector/memory T cell	5.89137e-16	-0.212749	0.996	0.998	2.17981e-14
S100A9	CD4+ effector/memory T cell	3.93151e-07	-0.482915	1	1	1.45466e-05
AIF-1	CD4+ effector/memory T cell	7.46382e-07	-0.648106	0.497	0.567	2.76161e-05
p-4E-BP1-Thr37/46	CD4+ effector/memory T cell	1.9064e-06	-0.1362	0.994	0.995	7.05368e-05
p-STAT3-Ser727	CD4+ effector/memory T cell	1.2503e-05	0.171759	0.961	0.921	0.000462611
NFAT1	CD4+ effector/memory T cell	2.19012e-05	0.128981	1	1	0.000810344
CD19	CD4+ effector/memory T cell	0.000219421	-0.212367	0.994	0.997	0.00811859
CD68	CD4+ effector/memory T cell	0.000302593	-0.555844	1	1	0.0111959
CD8	CD8+ naïve T cell	6.22535e-160	1.87109	1	0.976	2.30338e-158
TCF-7	CD8+ naïve T cell	1.93706e-87	0.469454	1	1	7.16713e-86
GR	CD8+ naïve T cell	1.4364e-83	-0.417867	1	1	5.31466e-82
TBX21	CD8+ naïve T cell	1.41424e-76	-0.732801	1	1	5.2327e-75
p-CREB-1-Ser133	CD8+ naïve T cell	1.15093e-75	-0.502006	1	1	4.25843e-74
NFAT1	CD8+ naïve T cell	3.87153e-72	-0.361546	1	1	1.43247e-70
MAPK-ERK1/2	CD8+ naïve T cell	2.83718e-61	-0.241588	1	1	1.04976e-59
H3K27me3	CD8+ naïve T cell	9.30264e-60	0.219368	1	1	3.44198e-58
Vimentin	CD8+ naïve T cell	5.0408e-59	-0.356317	1	1	1.86509e-57
p-H3-Ser10	CD8+ naïve T cell	1.88416e-58	-0.931842	0.995	0.996	6.97138e-57
FOXO1	CD8+ naïve T cell	2.06005e-54	0.294584	1	1	7.62217e-53
CD4	CD8+ naïve T cell	6.27156e-52	-1.57987	0.984	0.991	2.32048e-50
p-S6-Ser235/236	CD8+ naïve T cell	2.60552e-47	-0.523673	1	1	9.64042e-46
GAPDH	CD8+ naïve T cell	3.2969e-42	-0.113527	1	1	1.21985e-40
p-NF-κB-Ser536	CD8+ naïve T cell	9.011e-38	-0.378311	1	1	3.33407e-36
Ikaros	CD8+ naïve T cell	3.7817e-36	0.220724	1	1	1.39923e-34
S6	CD8+ naïve T cell	1.37023e-31	-0.132023	1	1	5.06985e-30
Aiolos	CD8+ naïve T cell	3.63998e-29	0.331336	1	0.993	1.34679e-27
STAT1	CD8+ naïve T cell	1.88366e-25	0.171034	1	1	6.96954e-24
p-Akt-Ser473	CD8+ naïve T cell	5.22548e-25	0.273674	0.997	0.998	1.93343e-23
NCAM1	CD8+ naïve T cell	3.07856e-15	-0.898237	0.979	0.996	1.13907e-13
p-GR-Ser226	CD8+ naïve T cell	1.16144e-14	-0.255672	1	0.999	4.29732e-13
p-STAT3-Ser727	CD8+ naïve T cell	2.96967e-14	0.434319	0.934	0.924	1.09878e-12
p-STAT3-Tyr705	CD8+ naïve T cell	1.19908e-11	-0.379868	0.997	0.998	4.43658e-10
CD3	CD8+ naïve T cell	1.31852e-07	0.432273	1	0.998	4.87852e-06
CD68	CD8+ naïve T cell	2.79269e-07	-0.656169	1	1	1.03329e-05
S100A9	CD8+ naïve T cell	6.224e-07	-0.497638	1	1	2.30288e-05
AIF-1	CD8+ naïve T cell	2.82102e-06	-0.531331	0.441	0.569	0.000104378
CD19	CD8+ naïve T cell	7.00208e-06	-0.213884	0.995	0.997	0.000259077
p-4E-BP1-Thr37/46	CD8+ naïve T cell	0.00054602	-0.11168	0.997	0.995	0.0202028
STAT1	CD8+ effector/memory T cell	5.33273e-140	-0.430551	1	1	1.97311e-138
NFAT1	CD8+ effector/memory T cell	2.97865e-136	0.337903	1	1	1.1021e-134
TBX21	CD8+ effector/memory T cell	4.1944e-128	0.379251	1	1	1.55193e-126
CD3	CD8+ effector/memory T cell	2.42349e-116	0.645236	0.998	0.998	8.96693e-115
CD8	CD8+ effector/memory T cell	1.13928e-108	1.1661	0.99	0.973	4.21535e-107
p-STAT1-Ser727	CD8+ effector/memory T cell	2.18087e-93	-0.640429	1	0.999	8.06923e-92
S100A9	CD8+ effector/memory T cell	9.92662e-59	-0.689046	1	1	3.67285e-57
p-STAT3-Tyr705	CD8+ effector/memory T cell	1.64057e-58	-0.452297	0.999	0.997	6.07012e-57
p-S6-Ser235/236	CD8+ effector/memory T cell	8.0369e-45	-0.373387	1	1	2.97365e-43
Aiolos	CD8+ effector/memory T cell	1.27198e-41	0.228076	0.999	0.991	4.70634e-40
H3K27Ac	CD8+ effector/memory T cell	1.41008e-38	0.124741	1	1	5.2173e-37
CD4	CD8+ effector/memory T cell	1.60154e-35	-0.457472	0.985	0.992	5.92569e-34
p-STAT3-Ser727	CD8+ effector/memory T cell	2.538e-35	-0.45173	0.915	0.929	9.39062e-34
p-GR-Ser226	CD8+ effector/memory T cell	7.88387e-35	-0.239327	1	0.998	2.91703e-33
p-CREB-1-Ser133	CD8+ effector/memory T cell	3.51707e-33	-0.203973	1	1	1.30132e-31
p-4E-BP1-Thr37/46	CD8+ effector/memory T cell	6.60864e-25	-0.201094	0.996	0.995	2.4452e-23
AIF-1	CD8+ effector/memory T cell	5.36256e-24	-0.964695	0.524	0.575	1.98415e-22
CD19	CD8+ effector/memory T cell	5.68245e-21	-0.284384	0.994	0.998	2.10251e-19
p-H3-Ser10	CD8+ effector/memory T cell	5.72639e-18	0.212143	0.999	0.995	2.11876e-16
p-Akt-Ser473	CD8+ effector/memory T cell	2.22516e-15	-0.145219	0.998	0.998	8.23308e-14
p-MAPK-ERK1/2-Thr202/Tyr204	CD8+ effector/memory T cell	4.38215e-12	-0.14798	0.994	0.993	1.6214e-10
CD68	CD8+ effector/memory T cell	1.42312e-08	-0.618973	1	1	5.26555e-07
NCAM1	NK cell	0	1.8448	0.999	0.994	0
TBX21	NK cell	0	0.827713	1	1	0
STAT1	NK cell	5.43651e-247	-0.647709	0.999	1	2.01151e-245
CD3	NK cell	2.64848e-221	-1.58433	0.995	0.998	9.79937e-220
Akt	NK cell	2.22168e-184	0.187401	1	1	8.2202e-183
NFAT1	NK cell	2.16417e-171	0.421734	1	1	8.00742e-170
GR	NK cell	1.13942e-164	0.331831	1	1	4.21584e-163
CD4	NK cell	1.01107e-151	-1.75117	0.987	0.991	3.74098e-150
p-CREB-1-Ser133	NK cell	1.67139e-119	0.330398	1	1	6.18414e-118
TCF-7	NK cell	3.23655e-118	-0.430733	1	1	1.19752e-116
p-H3-Ser10	NK cell	4.58793e-114	0.799453	0.998	0.996	1.69753e-112
p-STAT1-Ser727	NK cell	5.97305e-85	-0.654638	0.996	1	2.21003e-83
Aiolos	NK cell	3.06473e-83	0.510397	0.998	0.992	1.13395e-81
MAPK-ERK1/2	NK cell	5.78783e-82	0.161708	1	1	2.1415e-80
Histone H3	NK cell	1.38544e-73	0.101258	1	1	5.12615e-72
p-Akt-Ser473	NK cell	5.30276e-69	0.334734	0.997	0.998	1.96202e-67
FOXO1	NK cell	1.48276e-68	-0.256782	0.999	1	5.48622e-67
CD68	NK cell	1.27182e-64	-0.846118	0.999	1	4.70572e-63
H3K27Ac	NK cell	1.6263e-62	0.153954	1	1	6.01729e-61
p-STAT3-Ser727	NK cell	1.79659e-60	-0.667735	0.884	0.934	6.64739e-59
p-S6-Ser235/236	NK cell	1.00751e-58	0.161838	1	1	3.72778e-57
Ikaros	NK cell	1.8454e-29	0.148283	1	1	6.82798e-28
AIF-1	NK cell	3.30288e-09	-0.647188	0.521	0.57	1.22207e-07
S100A9	NK cell	2.5838e-07	-0.50073	0.999	1	9.56007e-06
p-STAT3-Tyr705	NK cell	1.28303e-05	-0.21871	0.996	0.998	0.000474721
CD8	NK cell	0.000156622	-0.541172	0.989	0.975	0.00579502
AIF-1	CD14+ monocyte	0	2.43475	0.987	0.506	0
p-STAT3-Tyr705	CD14+ monocyte	0	1.32717	1	0.997	0
p-STAT1-Ser727	CD14+ monocyte	0	1.57632	1	0.999	0
CD68	CD14+ monocyte	0	2.21779	1	1	0
H3K27Ac	CD14+ monocyte	0	-0.660331	1	1	0
H3K27me3	CD14+ monocyte	0	-0.83966	1	1	0
Ikaros	CD14+ monocyte	0	-0.980327	1	1	0
NFAT1	CD14+ monocyte	0	-1.70377	1	1	0
p-S6-Ser235/236	CD14+ monocyte	0	1.18021	1	1	0
S100A9	CD14+ monocyte	0	2.02952	1	1	0
STAT1	CD14+ monocyte	0	0.932805	1	1	0
Aiolos	CD14+ monocyte	3.0073e-307	-2.26281	0.963	0.997	1.1127e-305
NF-κB	CD14+ monocyte	1.97742e-296	-0.404192	1	1	7.31644e-295
TBX21	CD14+ monocyte	4.87402e-260	-1.12088	1	1	1.80339e-258
p-CREB-1-Ser133	CD14+ monocyte	1.42909e-234	0.627051	1	1	5.28762e-233
p-GR-Ser226	CD14+ monocyte	2.45265e-232	0.768315	1	0.999	9.07479e-231
FOXO1	CD14+ monocyte	2.82128e-207	-0.625015	1	1	1.04387e-205
TCF-7	CD14+ monocyte	8.26092e-169	-0.66325	1	1	3.05654e-167
CD3	CD14+ monocyte	8.33768e-153	-2.08922	1	0.998	3.08494e-151
p-4E-BP1-Thr37/46	CD14+ monocyte	3.63164e-118	0.565204	1	0.994	1.34371e-116
Akt	CD14+ monocyte	8.78548e-104	-0.175966	1	1	3.25063e-102
Histone H3	CD14+ monocyte	2.26457e-103	-0.159745	1	1	8.3789e-102
Vimentin	CD14+ monocyte	3.39397e-101	0.33103	1	1	1.25577e-99
S6	CD14+ monocyte	1.03618e-77	0.160482	1	1	3.83386e-76
p-H3-Ser10	CD14+ monocyte	4.58502e-65	0.315963	1	0.996	1.69646e-63
NCAM1	CD14+ monocyte	1.35839e-49	-1.04112	0.998	0.994	5.02604e-48
CD8	CD14+ monocyte	5.63502e-47	-1.98606	0.984	0.977	2.08496e-45
p-Akt-Ser473	CD14+ monocyte	1.53945e-25	-0.248084	1	0.998	5.69597e-24
p-STAT3-Ser727	CD14+ monocyte	1.56959e-25	0.320355	0.989	0.917	5.8075e-24
p-NF-κB-Ser536	CD14+ monocyte	4.42638e-24	0.215429	1	1	1.63776e-22
p-MAPK-ERK1/2-Thr202/Tyr204	CD14+ monocyte	2.51419e-08	0.158724	0.998	0.992	9.3025e-07
AIF-1	CD16+ monocyte	2.06799e-27	2.58024	1	0.557	7.65156e-26
NFAT1	CD16+ monocyte	1.9099e-22	-1.44502	1	1	7.06661e-21
p-S6-Ser235/236	CD16+ monocyte	3.27822e-22	1.02322	1	1	1.21294e-20
p-STAT3-Tyr705	CD16+ monocyte	4.38615e-21	1.18788	1	0.997	1.62288e-19
Aiolos	CD16+ monocyte	5.81225e-20	-1.80504	0.932	0.994	2.15053e-18
p-CREB-1-Ser133	CD16+ monocyte	6.30672e-20	0.663334	1	1	2.33349e-18
CD68	CD16+ monocyte	8.49697e-20	1.46777	1	1	3.14388e-18
p-STAT1-Ser727	CD16+ monocyte	2.7745e-19	1.02617	1	0.999	1.02657e-17
Ikaros	CD16+ monocyte	2.97671e-19	-0.703996	1	1	1.10138e-17
H3K27me3	CD16+ monocyte	5.32161e-19	-0.544878	1	1	1.969e-17
TBX21	CD16+ monocyte	7.70982e-19	-1.02343	1	1	2.85263e-17
p-GR-Ser226	CD16+ monocyte	3.25176e-17	0.762472	1	0.999	1.20315e-15
H3K27Ac	CD16+ monocyte	1.46494e-16	-0.401799	1	1	5.42028e-15
S100A9	CD16+ monocyte	5.08337e-16	0.875394	1	1	1.88085e-14
STAT1	CD16+ monocyte	9.95991e-15	0.534539	1	1	3.68517e-13
Akt	CD16+ monocyte	1.89155e-13	-0.195989	1	1	6.99873e-12
CD3	CD16+ monocyte	5.69558e-13	-1.8006	0.977	0.998	2.10736e-11
NF-κB	CD16+ monocyte	1.07751e-11	-0.167498	1	1	3.98677e-10
TCF-7	CD16+ monocyte	7.10108e-11	-0.483548	1	1	2.6274e-09
FOXO1	CD16+ monocyte	1.14736e-09	-0.350361	1	1	4.24524e-08
CREB-1	CD16+ monocyte	3.1216e-07	0.169414	1	1	1.15499e-05
p-H3-Ser10	CD16+ monocyte	6.81127e-06	0.378592	1	0.996	0.000252017
Vimentin	CD16+ monocyte	2.54251e-05	0.257366	1	1	0.000940729
NCAM1	CD16+ monocyte	7.71788e-05	-0.857873	1	0.995	0.00285561
CD8	CD16+ monocyte	0.00012463	-1.55343	0.977	0.977	0.00461132
GR	CD16+ monocyte	0.000644814	0.211183	1	1	0.0238581
p-NF-κB-Ser536	CD16+ monocyte	0.00234845	0.397922	1	1	0.0868927
Aiolos	Other	2.25275e-15	-1.65497	0.912	0.994	8.33517e-14
S6	Other	3.39452e-12	0.276413	1	1	1.25597e-10
CREB-1	Other	8.6864e-12	0.312736	1	1	3.21397e-10
p-STAT1-Ser727	Other	2.33745e-11	0.931484	1	0.999	8.64856e-10
p-CREB-1-Ser133	Other	1.28859e-10	0.5789	1	1	4.76777e-09
p-S6-Ser235/236	Other	1.06876e-09	0.566785	1	1	3.95441e-08
CD3	Other	1.09659e-08	-1.55117	1	0.998	4.0574e-07
NFAT1	Other	1.1294e-08	-0.502246	1	1	4.17879e-07
p-STAT3-Tyr705	Other	1.53736e-08	0.676589	1	0.997	5.68825e-07
H3K27me3	Other	1.57899e-08	-0.24726	1	1	5.84226e-07
p-H3-Ser10	Other	8.0838e-07	0.813349	1	0.996	2.991e-05
H3K27Ac	Other	1.39163e-06	-0.183857	1	1	5.14904e-05
Ikaros	Other	3.25092e-06	-0.223867	1	1	0.000120284
TBX21	Other	3.9507e-06	-0.545159	1	1	0.000146176
p-GR-Ser226	Other	4.54592e-06	0.428355	1	0.999	0.000168199
CD8	Other	0.000232527	-1.99945	0.971	0.977	0.0086035
STAT1	Other	0.000342376	0.274412	1	1	0.0126679
CD68	Other	0.000381989	0.831605	1	1	0.0141336
p-NF-κB-Ser536	Other	0.00137996	0.442959	1	1	0.0510585
NF-κB	Other	0.00149719	0.142596	1	1	0.0553959
GAPDH	Other	0.00383806	0.102348	1	1	0.142008
p-4E-BP1-Thr37/46	Other	0.00387207	0.504209	1	0.995	0.143267
