# Supplementary material for: InTraSeq: A Multimodal Assay that Uncovers New Single-Cell Biology and Regulatory Mechanisms
Source: Research Square preprint supplement (doi:10.21203/rs.3.rs-5284652/v1), 2024-12-09
Supplement: Supplementary file 3 [file 762a9452864fbb45d701825d.xlsx]

## Sheet: Sheet 1
	Live	InTraSeq RNA-only	InTraSeq RNA+ADT
Number_of_cells	7000	7000	7000
Average_RNA_reads_per_cell	7779.02	7780.21	7779.57
Median_RNA_reads_per_cell	5126.5	5542.5	5867
1st_Quartile_RNA_reads_per_cell	3754.75	3846.5	4100.25
3rd_Quartile_RNA_reads_per_cell	8139.5	9860	9857.5
Average_RNA_UMIs_per_cell	5305.13	4569.36	4046.06
Median_RNA_UMIs_per_cell	3492	3264	3069.5
1st_Quartile_RNA_UMIs_per_cell	2557	2263	2139.75
3rd_Quartile_RNA_UMIs_per_cell	5552.5	5799	5090.75
Total_genes_detected	26585	27349	27171
Average_genes_per_cell	2151.09	2033.33	1899.36
Median_genes_per_cell	1744.5	1705.5	1652.5
1st_Quartile_genes_per_cell	1388	1288	1234
3rd_Quartile_genes_per_cell	2536.25	2570	2357
Average_ADT_reads_per_cell			8655.69
Median_ADT_reads_per_cell			7605
1st_Quartile_ADT_reads_per_cell			5577
3rd_Quartile_ADT_reads_per_cell			10654.8
Average_ADT_UMIs_per_cell			3243.66
Median_ADT_UMIs_per_cell			2800
1st_Quartile_ADT_UMIs_per_cell			2038.75
3rd_Quartile_ADT_UMIs_per_cell			3971.25
Total_proteins_detected			37
Average_proteins_per_cell			36.4551
Median_proteins_per_cell			37
1st_Quartile_proteins_per_cell			36
3rd_Quartile_proteins_per_cell			37
