# Supplementary material for: InTraSeq: A Multimodal Assay that Uncovers New Single-Cell Biology and Regulatory Mechanisms
Source: Research Square preprint supplement (doi:10.21203/rs.3.rs-5284652/v1), 2024-12-09
Supplement: Supplementary file 5 [file 8831d3866046c0c9c502ba02.xlsx]

## Sheet: Sheet 1
gene	cluster	p_val	avg_log2FC	pct.1	pct.2	p_val_adj
Txnip	0	0	2.60768	0.755	0.199	0
Il7r	0	0	2.43647	0.74	0.223	0
Themis	0	0	2.1911	0.783	0.296	0
Jun	0	0	2.34407	0.618	0.154	0
Irf4	0	0	-4.30023	0.04	0.492	0
Grap2	0	0	1.90265	0.848	0.396	0
Arhgef18	0	0	2.32401	0.626	0.187	0
Ripor2	0	0	1.99334	0.903	0.47	0
Fyb	0	0	1.81721	0.807	0.377	0
Gm2682	0	0	2.00357	0.954	0.526	0
Apbb1ip	0	0	1.96805	0.712	0.306	0
Sp100	0	0	1.90479	0.649	0.245	0
Pdcd4	0	0	1.77192	0.715	0.312	0
Tsc22d3	0	0	2.26253	0.54	0.138	0
Zbtb20	0	0	1.6233	0.844	0.447	0
Itga4	0	0	2.47056	0.559	0.164	0
Il2ra	0	0	-5.8967	0.009	0.399	0
Arl4c	0	0	1.94273	0.547	0.171	0
Txn1	0	0	-2.41458	0.186	0.55	0
Itpr2	0	0	1.6402	0.678	0.315	0
Odc1	0	0	-2.93013	0.091	0.449	0
Rcsd1	0	0	2.43289	0.476	0.121	0
Ifi203	0	0	1.39412	0.566	0.211	0
Snrpd1	0	0	-1.88492	0.258	0.613	0
Add3	0	0	1.77443	0.633	0.278	0
Tuba1b	0	0	-2.23816	0.161	0.515	0
Camk4	0	0	1.64196	0.665	0.313	0
Macf1	0	0	1.79684	0.914	0.563	0
Ppm1h	0	0	1.65968	0.702	0.351	0
Snu13	0	0	-1.71245	0.327	0.677	0
Pecam1	0	0	1.49676	0.599	0.26	0
Ppa1	0	0	-2.46672	0.101	0.436	0
H2afz	0	0	-1.76608	0.326	0.658	0
Prdx1	0	0	-1.6889	0.377	0.708	0
Pde3b	0	0	1.85735	0.686	0.356	0
Slc9a9	0	0	1.73984	0.546	0.216	0
Rps27l	0	0	-2.46596	0.131	0.461	0
Pag1	0	0	1.57127	0.595	0.269	0
Ran	0	0	-2.06342	0.373	0.699	0
Mndal	0	0	1.20908	0.561	0.236	0
Dock8	0	0	1.57253	0.684	0.359	0
Fos	0	0	0.71819	0.521	0.197	0
Ms4a4b	0	0	1.1042	0.854	0.531	0
Nhp2	0	0	-2.24848	0.154	0.476	0
Scml4	0	0	1.035	0.685	0.364	0
Stk10	0	0	1.77706	0.558	0.238	0
Cdkn1b	0	0	1.68688	0.544	0.226	0
Cyth1	0	0	1.50563	0.656	0.342	0
4930523C07Rik	0	0	1.39794	0.574	0.26	0
Ccnd3	0	0	1.77895	0.918	0.606	0
Magoh	0	0	-1.59119	0.199	0.509	0
Hivep3	0	0	-3.42739	0.063	0.373	0
Socs1	0	0	-2.80352	0.105	0.414	0
Tubb4b	0	0	-1.79135	0.191	0.498	0
Tomm20	0	0	-1.38631	0.364	0.669	0
Chchd2	0	0	-1.6124	0.498	0.802	0
Cycs	0	0	-1.89055	0.154	0.458	0
Pgam1	0	0	-2.09674	0.133	0.436	0
Snrpd2	0	0	-1.70109	0.276	0.579	0
Fgf13	0	0	2.00693	0.47	0.167	0
Pcna	0	0	-1.64263	0.233	0.535	0
Ankrd44	0	0	1.42676	0.89	0.59	0
Gm2245	0	0	1.95808	0.435	0.135	0
Nme1	0	0	-2.03877	0.358	0.657	0
Pik3ip1	0	0	2.4599	0.382	0.083	0
Mif	0	0	-2.31487	0.386	0.684	0
Ranbp1	0	0	-1.89588	0.281	0.579	0
Gapdh	0	0	-1.5088	0.418	0.715	0
Pced1b	0	0	1.60713	0.545	0.249	0
Sntb1	0	0	1.69382	0.494	0.198	0
Celf2	0	0	1.51985	0.587	0.292	0
Fbl	0	0	-1.43807	0.329	0.624	0
Atp5g1	0	0	-1.59248	0.324	0.618	0
Rapgef4	0	0	2.42886	0.377	0.084	0
Eif5a	0	0	-2.08542	0.576	0.868	0
Ppp1r14b	0	0	-1.72278	0.319	0.611	0
D8Ertd738e	0	0	-1.17332	0.35	0.64	0
Itgb7	0	0	1.48313	0.531	0.242	0
Gm26740	0	0	1.19549	0.532	0.246	0
Mrto4	0	0	-2.23814	0.099	0.383	0
Kmt2c	0	0	1.4268	0.622	0.339	0
Psma7	0	0	-1.45037	0.347	0.629	0
Bax	0	0	-1.77899	0.273	0.554	0
Zfp36l2	0	0	1.25314	0.669	0.388	0
Dock10	0	0	0.981722	0.861	0.581	0
Rbm8a	0	0	-1.39635	0.24	0.52	0
Adgre5	0	0	1.63004	0.442	0.162	0
Srgn	0	0	-1.8498	0.609	0.888	0
Nr4a1	0	0	-2.96399	0.168	0.447	0
Ppp3ca	0	0	1.4503	0.464	0.186	0
1810026B05Rik	0	0	1.38804	0.684	0.407	0
Eloc	0	0	-1.35388	0.235	0.512	0
Emp3	0	0	1.26252	0.623	0.346	0
Slc25a5	0	0	-1.30749	0.414	0.69	0
Stk4	0	0	1.3206	0.648	0.373	0
Cmah	0	0	1.55672	0.484	0.209	0
U2af1	0	0	-1.33967	0.333	0.608	0
Sptbn1	0	0	1.36306	0.552	0.278	0
Prmt1	0	0	-1.61592	0.211	0.484	0
Rasa3	0	0	1.45673	0.513	0.24	0
Sub1	0	0	-1.39009	0.58	0.853	0
Dock11	0	0	1.21196	0.622	0.349	0
Hspe1	0	0	-1.71685	0.456	0.729	0
Klf6	0	0	1.41339	0.47	0.197	0
Impdh2	0	0	-1.38667	0.212	0.484	0
Ssr4	0	0	-1.29847	0.262	0.534	0
Aak1	0	0	1.41667	0.579	0.307	0
Sell	0	0	1.35371	0.494	0.224	0
Ndufab1	0	0	-1.63549	0.189	0.459	0
Atp5md	0	0	-1.25082	0.271	0.541	0
Pmepa1	0	0	-3.28962	0.035	0.304	0
Tnik	0	0	1.28085	0.717	0.449	0
C1qbp	0	0	-1.69336	0.204	0.471	0
Ndufc2	0	0	-1.49647	0.202	0.468	0
Klf2	0	0	0.546466	0.801	0.535	0
Ndufa12	0	0	-1.6409	0.16	0.426	0
Psmb6	0	0	-1.34796	0.217	0.483	0
Psmb5	0	0	-1.37807	0.219	0.484	0
Pomp	0	0	-1.31573	0.263	0.526	0
Igf1r	0	0	-1.80851	0.129	0.392	0
Psmb4	0	0	-1.21083	0.262	0.524	0
Mrpl20	0	0	-1.69248	0.14	0.402	0
Polr1d	0	0	-1.05758	0.383	0.645	0
Snrpa1	0	0	-1.70682	0.143	0.405	0
Mrpl12	0	0	-1.77573	0.15	0.412	0
Manf	0	0	-1.31876	0.291	0.552	0
Tgfbr2	0	0	1.13554	0.671	0.41	0
Maf	0	0	-5.22855	0.012	0.272	0
Eif4a1	0	0	-1.3123	0.569	0.829	0
Ifi213	0	0	1.99488	0.345	0.086	0
Ubl5	0	0	-1.05163	0.386	0.645	0
Nsg2	0	0	1.71462	0.404	0.145	0
Snrpf	0	0	-1.22288	0.424	0.682	0
St8sia6	0	0	2.13492	0.367	0.109	0
Phb2	0	0	-1.31806	0.274	0.532	0
Tnrc6b	0	0	1.06046	0.787	0.529	0
St6gal1	0	0	1.34896	0.535	0.277	0
Fam162a	0	0	-1.82054	0.124	0.382	0
Ighm	0	0	1.70706	0.427	0.17	0
Sidt1	0	0	2.26782	0.362	0.105	0
Eif6	0	0	-1.46121	0.19	0.446	0
Atp5g3	0	0	-1.19402	0.282	0.537	0
Esyt2	0	0	1.14947	0.628	0.373	0
Stk38	0	0	1.24732	0.64	0.385	0
Tomm5	0	0	-1.63948	0.182	0.436	0
Psmb2	0	0	-1.20407	0.278	0.532	0
Egr2	0	0	-3.5011	0.052	0.306	0
Bsg	0	0	-1.39766	0.186	0.44	0
Sh3kbp1	0	0	1.20324	0.762	0.508	0
Rbm3	0	0	-0.987573	0.458	0.712	0
Snrpb	0	0	-1.13131	0.398	0.651	0
Ebna1bp2	0	0	-1.68549	0.147	0.4	0
Psma5	0	0	-1.45443	0.181	0.433	0
Eny2	0	0	-1.43117	0.164	0.416	0
Runx1	0	0	0.954587	0.792	0.54	0
Pdcd5	0	0	-1.32846	0.196	0.447	0
Smarca2	0	0	1.55683	0.427	0.176	0
Tnfaip3	0	0	0.713154	0.508	0.258	0
Fam78a	0	0	2.23258	0.347	0.097	0
Sh2d2a	0	0	-1.59834	0.148	0.397	0
Prkcq	0	0	1.21284	0.854	0.605	0
Dctpp1	0	0	-2.93305	0.044	0.293	0
Psmc5	0	0	-1.39111	0.18	0.429	0
Txnl1	0	0	-1.3158	0.187	0.434	0
Rasgrp2	0	0	1.34022	0.431	0.184	0
Foxn3	0	0	1.30721	0.812	0.566	0
St8sia4	0	0	1.90884	0.343	0.097	0
Fabp5	0	0	-3.97764	0.02	0.266	0
Pdk1	0	0	1.70915	0.424	0.178	0
Pdia6	0	0	-1.53265	0.173	0.419	0
Arhgap45	0	0	1.04192	0.705	0.459	0
Snrpe	0	0	-1.16197	0.438	0.683	0
Ddx39	0	0	-1.54182	0.155	0.4	0
Rasgrp1	0	0	1.3156	0.478	0.233	0
Ldha	0	0	-1.21737	0.43	0.674	0
Tgfbr3	0	0	1.72433	0.396	0.152	0
Dapl1	0	0	1.49227	0.416	0.172	0
Polr2f	0	0	-1.46683	0.185	0.429	0
Srm	0	0	-2.33681	0.078	0.321	0
Uqcrq	0	0	-1.20494	0.265	0.508	0
Aldoa	0	0	-1.25235	0.332	0.575	0
Pgk1	0	0	-1.32539	0.222	0.464	0
Gar1	0	0	-1.80996	0.108	0.35	0
Calr	0	0	-1.20348	0.281	0.523	0
Nr4a3	0	0	-3.51381	0.12	0.361	0
Cox5a	0	0	-1.27918	0.396	0.637	0
Epsti1	0	0	1.88175	0.346	0.105	0
Trat1	0	0	2.12516	0.323	0.082	0
Atp6v0c	0	0	-1.01061	0.338	0.579	0
Atp1b3	0	0	1.23341	0.737	0.497	0
Cks2	0	0	-2.80522	0.049	0.289	0
Pfdn2	0	0	-1.15446	0.297	0.536	0
Sf3b6	0	0	-1.11123	0.304	0.542	0
Zc3h12d	0	0	-1.92306	0.096	0.334	0
Dnah8	0	0	2.22686	0.327	0.089	0
Aprt	0	0	-1.29649	0.236	0.474	0
Usp3	0	0	1.28526	0.585	0.347	0
Dgka	0	0	1.0518	0.77	0.532	0
Dock2	0	0	1.44205	0.945	0.707	0
Nedd9	0	0	1.15062	0.635	0.397	0
Etv6	0	0	-1.56646	0.184	0.421	0
Psma4	0	0	-1.2809	0.202	0.439	0
Uba1	0	0	-1.66139	0.172	0.409	0
Ets1	0	0	1.24424	0.927	0.691	0
Crlf3	0	0	1.35365	0.555	0.319	0
Evl	0	0	1.29165	0.53	0.294	0
Psma2	0	0	-1.07984	0.352	0.588	0
Nfkb1	0	0	-1.49284	0.44	0.675	0
Cct3	0	0	-1.1884	0.267	0.502	0
Timm13	0	0	-1.213	0.265	0.5	0
Asap1	0	0	1.27477	0.567	0.332	0
Nap1l1	0	0	-1.20264	0.308	0.542	0
Hsp90aa1	0	0	-1.13571	0.427	0.661	0
Traf3ip3	0	0	1.42192	0.453	0.219	0
Kif21b	0	0	1.7055	0.372	0.138	0
Rheb	0	0	-1.16729	0.238	0.472	0
Rexo2	0	0	-1.45416	0.244	0.478	0
Timm23	0	0	-1.10089	0.263	0.497	0
Phf21a	0	0	1.2936	0.574	0.34	0
Slco3a1	0	0	1.61015	0.423	0.19	0
Srsf2	0	0	-1.02148	0.35	0.583	0
Galnt10	0	0	1.44561	0.467	0.235	0
Bcl2a1b	0	0	-3.22991	0.038	0.27	0
Tmem71	0	0	1.56212	0.376	0.144	0
Dipk1a	0	0	1.72722	0.407	0.175	0
Tomm40	0	0	-1.56458	0.137	0.369	0
Banf1	0	0	-1.24781	0.262	0.494	0
Hspd1	0	0	-1.42552	0.299	0.53	0
Lef1	0	0	1.35481	0.949	0.718	0
Cox7b	0	0	-1.07258	0.269	0.5	0
Atp5o	0	0	-1.05288	0.31	0.54	0
Eif3g	0	0	-1.25169	0.183	0.413	0
Uqcrb	0	0	-1.10663	0.243	0.473	0
Mrps6	0	0	-1.67644	0.108	0.337	0
Tomm6	0	0	-1.0422	0.295	0.524	0
Snhg1	0	0	-0.968316	0.291	0.52	0
Prkcb	0	0	1.41669	0.499	0.27	0
Psma3	0	0	-0.905781	0.384	0.613	0
Hnrnpa0	0	0	-1.02846	0.249	0.478	0
Cox7a2	0	0	-1.02318	0.322	0.55	0
Atp8b4	0	0	1.88986	0.316	0.088	0
Ube2m	0	0	-1.29433	0.169	0.397	0
Psmd8	0	0	-1.08307	0.231	0.459	0
Pacs1	0	0	1.56565	0.448	0.22	0
Cytip	0	0	0.843199	0.835	0.607	0
Ccdc88c	0	0	1.35835	0.506	0.278	0
Rnf19a	0	0	-1.2224	0.354	0.582	0
Dbi	0	0	-1.35478	0.16	0.387	0
Cct5	0	0	-1.00642	0.316	0.542	0
Vim	0	0	1.31785	0.404	0.179	0
Kcnq5	0	0	-1.9566	0.069	0.294	0
Arpc3	0	0	-0.901748	0.511	0.736	0
Cct7	0	0	-1.05059	0.335	0.559	0
Lsm6	0	0	-1.24478	0.182	0.406	0
Tcp1	0	0	-1.04618	0.292	0.516	0
Klf3	0	0	1.4241	0.38	0.156	0
S1pr1	0	0	1.11354	0.419	0.195	0
Iqgap2	0	0	1.14155	0.493	0.269	0
Stat4	0	0	1.06628	0.437	0.214	0
Tnfrsf4	0	0	-4.06601	0.019	0.242	0
Mdh2	0	0	-0.950289	0.346	0.569	0
Tbc1d1	0	0	1.316	0.528	0.306	0
Pik3r5	0	0	1.76952	0.343	0.121	0
Hif1a	0	0	-1.29119	0.303	0.525	0
Orai1	0	0	-1.27689	0.227	0.449	0
Pa2g4	0	0	-1.42184	0.161	0.383	0
Phf5a	0	0	-1.23596	0.163	0.385	0
Atp5d	0	0	-1.03219	0.502	0.724	0
Znrd2	0	0	-1.92785	0.078	0.3	0
Psma1	0	0	-1.22836	0.167	0.388	0
Pebp1	0	0	-1.04936	0.281	0.502	0
Ndufb7	0	0	-1.06075	0.278	0.499	0
Pin1	0	0	-1.82966	0.085	0.306	0
Psmb3	0	0	-1.04478	0.391	0.612	0
Cct8	0	0	-1.08151	0.354	0.575	0
Nedd8	0	0	-1.03773	0.384	0.604	0
Bcl11b	0	0	1.06659	0.803	0.584	0
Ndufa4	0	0	-1.1996	0.46	0.679	0
Sf3b5	0	0	-1.10212	0.243	0.462	0
Dynll2	0	0	-1.55987	0.121	0.34	0
Eif1ax	0	0	-1.2033	0.172	0.391	0
Eif2s1	0	0	-1.12471	0.204	0.423	0
Capg	0	0	-2.77789	0.052	0.27	0
Ube2s	0	0	-0.910293	0.433	0.651	0
Wdr83os	0	0	-1.06385	0.222	0.44	0
Nop10	0	0	-1.06966	0.375	0.593	0
Pcbp1	0	0	-1.03985	0.258	0.476	0
Ube2a	0	0	-1.39363	0.13	0.348	0
Dad1	0	0	-1.02394	0.584	0.801	0
Cnih4	0	0	-1.69083	0.091	0.308	0
Top2b	0	0	1.28981	0.563	0.346	0
Polr2e	0	0	-1.25829	0.18	0.396	0
Sipa1l1	0	0	1.07159	0.517	0.301	0
Lyar	0	0	-1.74846	0.093	0.309	0
Utrn	0	0	0.900789	0.866	0.65	0
Atp11b	0	0	0.933286	0.642	0.427	0
Uqcc2	0	0	-1.46796	0.125	0.34	0
A430093F15Rik	0	0	-1.80061	0.091	0.306	0
Izumo1r	0	0	-1.56176	0.14	0.355	0
Hmgn1	0	0	-1.01087	0.271	0.486	0
Slc12a6	0	0	1.68498	0.364	0.15	0
Samd9l	0	0	1.64685	0.306	0.092	0
Selenok	0	0	-0.83181	0.385	0.599	0
Kbtbd11	0	0	1.44849	0.386	0.173	0
Llph	0	0	-0.897614	0.311	0.524	0
Gramd3	0	0	0.476706	0.624	0.411	0
Dynll1	0	0	-0.861255	0.378	0.591	0
Nsd1	0	0	1.2277	0.607	0.394	0
Fkbp1a	0	0	-1.01055	0.35	0.562	0
Psmb7	0	0	-1.14195	0.183	0.395	0
St8sia1	0	0	1.33563	0.452	0.24	0
Gm48099	0	0	2.87138	0.266	0.054	0
Rfx3	0	0	1.46837	0.401	0.189	0
Herc3	0	0	1.6249	0.36	0.148	0
Cd226	0	0	2.08595	0.304	0.092	0
Lncpint	0	0	0.544846	0.742	0.53	0
Cox6a1	0	0	-0.848538	0.335	0.546	0
Ssr2	0	0	-1.31009	0.139	0.35	0
Map3k3	0	0	1.40632	0.407	0.196	0
Ly6e	0	0	0.862562	0.728	0.517	0
Cox5b	0	0	-0.912519	0.313	0.523	0
Gimap5	0	0	-1.30649	0.195	0.405	0
Cyc1	0	0	-1.15007	0.178	0.388	0
Cd247	0	0	0.885442	0.816	0.606	0
4932438A13Rik	0	0	0.568163	0.7	0.49	0
Cox6b1	0	0	-0.947081	0.392	0.602	0
Nop58	0	0	-0.997113	0.256	0.465	0
Nudc	0	0	-1.14986	0.244	0.453	0
Ndufa5	0	0	-1.15949	0.176	0.385	0
Arhgef1	0	0	1.02116	0.656	0.447	0
Gadd45b	0	0	-3.39944	0.066	0.275	0
Fdps	0	0	-1.87961	0.08	0.289	0
Ybx1	0	0	-1.19765	0.512	0.721	0
Atp6v1f	0	0	-0.814981	0.321	0.529	0
Imp3	0	0	-0.905967	0.283	0.491	0
Ssbp2	0	0	1.2636	0.459	0.251	0
Jak1	0	0	1.0035	0.873	0.665	0
Emb	0	0	0.875905	0.688	0.48	0
Atp5j	0	0	-0.929396	0.389	0.597	0
Mycbp2	0	0	1.03902	0.774	0.567	0
Stim1	0	0	1.19879	0.531	0.324	0
Batf	0	0	-1.98991	0.107	0.314	0
Pik3r1	0	0	1.38031	0.395	0.188	0
1110038B12Rik	0	0	-1.83408	0.073	0.28	0
Plcl2	0	0	1.28814	0.498	0.291	0
Cbx4	0	0	1.34435	0.367	0.16	0
Zfp593	0	0	-1.72646	0.084	0.291	0
Mrpl17	0	0	-1.73448	0.084	0.291	0
Map1lc3b	0	0	-0.811014	0.358	0.565	0
Ppp1r16b	0	0	-1.2379	0.256	0.462	0
Tspan32	0	0	1.51857	0.39	0.184	0
Ndufb8	0	0	-1.14677	0.171	0.377	0
Srsf9	0	0	-1.32068	0.133	0.338	0
Psmd7	0	0	-1.43742	0.114	0.319	0
Polr2h	0	0	-1.47251	0.105	0.31	0
Malt1	0	0	-1.87161	0.421	0.626	0
Grpel1	0	0	-1.18089	0.16	0.365	0
Dennd1b	0	0	1.23702	0.479	0.274	0
Akap13	0	0	0.79147	0.862	0.657	0
Taf10	0	0	-0.891598	0.395	0.6	0
Kmt2a	0	0	1.11504	0.571	0.366	0
Sumo2	0	0	-0.952338	0.508	0.713	0
Cox6c	0	0	-0.957093	0.477	0.681	0
Rbms1	0	0	1.13269	0.443	0.239	0
Med14	0	0	-1.25541	0.255	0.459	0
Mrpl15	0	0	-1.19166	0.161	0.365	0
Lyst	0	0	1.62901	0.363	0.159	0
Ndfip1	0	0	-0.9135	0.55	0.754	0
Foxo1	0	0	0.990122	0.658	0.455	0
Nedd4l	0	0	1.6384	0.34	0.137	0
Itm2a	0	0	-2.34716	0.103	0.306	0
Emc6	0	0	-1.15164	0.167	0.37	0
Chchd1	0	0	-1.24497	0.142	0.345	0
Eif3i	0	0	-0.840333	0.362	0.565	0
Timm8a1	0	0	-1.7773	0.084	0.287	0
Tuba4a	0	0	-1.0325	0.202	0.404	0
Tln1	0	0	1.19494	0.519	0.317	0
Tecpr1	0	0	1.29618	0.383	0.181	0
Vps13c	0	0	1.86783	0.319	0.117	0
Txn2	0	0	-1.08773	0.184	0.386	0
Cd96	0	0	2.20315	0.269	0.067	0
Cep350	0	0	1.39801	0.409	0.207	0
Pdap1	0	0	-1.18582	0.161	0.363	0
Tkt	0	0	-1.03708	0.211	0.413	0
Klf13	0	0	0.782687	0.72	0.518	0
Gm2000	0	0	-1.23275	0.142	0.343	0
Hsd11b1	0	0	1.27697	0.376	0.175	0
Hp1bp3	0	0	1.43691	0.398	0.197	0
Actn1	0	0	0.921141	0.533	0.332	0
Srsf7	0	0	-0.830083	0.448	0.649	0
Micos10	0	0	-0.988171	0.233	0.434	0
Gadd45gip1	0	0	-1.1881	0.157	0.358	0
Fcf1	0	0	-1.1134	0.157	0.358	0
Setx	0	0	1.09682	0.565	0.364	0
Arhgap15	0	0	1.61972	0.998	0.797	0
Atp5f1	0	0	-0.833406	0.387	0.588	0
Ube2l3	0	0	-0.892506	0.258	0.458	0
Il6ra	0	0	1.09225	0.467	0.268	0
Fry	0	0	2.11231	0.278	0.079	0
AI662270	0	0	-1.38208	0.114	0.313	0
Kdm6b	0	0	-1.85845	0.152	0.351	0
Chd2	0	0	0.714085	0.66	0.462	0
Bbs9	0	0	1.90696	0.306	0.108	0
Hnrnpab	0	0	-0.940615	0.331	0.529	0
Galk1	0	0	-2.24877	0.049	0.247	0
Mydgf	0	0	-1.38517	0.113	0.311	0
Egr1	0	0	-2.07168	0.257	0.455	0
Glrx3	0	0	-0.996716	0.22	0.418	0
Arid1b	0	0	1.08	0.594	0.396	0
Dnm2	0	0	1.13475	0.49	0.293	0
Psma6	0	0	-1.05281	0.185	0.382	0
Lman2	0	0	-1.01257	0.197	0.394	0
Csnk2b	0	0	-0.949393	0.201	0.398	0
Ndufb6	0	0	-1.43873	0.1	0.297	0
Ndufs5	0	0	-1.0285	0.219	0.416	0
Trappc4	0	0	-1.05125	0.167	0.364	0
Timm17a	0	0	-1.29926	0.126	0.322	0
Edf1	0	0	-0.860103	0.32	0.516	0
Cct6a	0	0	-0.963571	0.269	0.465	0
Cdk4	0	0	-1.44063	0.112	0.308	0
Cast	0	0	1.08396	0.512	0.316	0
H2-Q4	0	0	1.04394	0.392	0.196	0
Psmc4	0	0	-1.13709	0.158	0.354	0
Nip7	0	0	-1.50917	0.099	0.295	0
Itk	0	0	0.740183	0.836	0.64	0
Gpr183	0	0	0.651477	0.573	0.377	0
Elob	0	0	-0.81794	0.472	0.667	0
Dusp10	0	0	0.912421	0.375	0.18	0
Swi5	0	0	-1.02999	0.19	0.385	0
Polr2j	0	0	-1.07799	0.181	0.376	0
Mrpl52	0	0	-0.806866	0.317	0.512	0
Herc4	0	0	1.35486	0.421	0.226	0
Slc49a4	0	0	1.67357	0.292	0.097	0
Skap1	0	0	1.38814	0.976	0.781	0
Lnpep	0	0	0.999637	0.575	0.38	0
Ube2i	0	0	-0.739813	0.371	0.566	0
Psmc2	0	0	-1.17485	0.148	0.342	0
Zap70	0	0	-1.02385	0.24	0.434	0
Mrpl54	0	0	-1.22133	0.133	0.327	0
Rbx1	0	0	-0.883494	0.427	0.621	0
Npm3	0	0	-1.11387	0.178	0.372	0
Gnl3	0	0	-1.00211	0.213	0.406	0
Ndufb9	0	0	-0.957867	0.225	0.418	0
Fosl2	0	0	-2.73736	0.06	0.252	0
Sem1	0	0	-0.828238	0.462	0.654	0
Pkm	0	0	-1.02976	0.465	0.657	0
Higd1a	0	0	-0.992239	0.2	0.392	0
Ipcef1	0	0	0.583345	0.53	0.338	0
Mrpl21	0	0	-1.03936	0.158	0.35	0
Tle4	0	0	0.595654	0.573	0.381	0
Sesn1	0	0	1.52762	0.335	0.144	0
Pfdn6	0	0	-1.14406	0.152	0.343	0
Tpi1	0	0	-2.38723	0.057	0.248	0
Slc29a1	0	0	-2.71874	0.035	0.226	0
Myl12a	0	0	-0.690896	0.409	0.6	0
Rpl7l1	0	0	-1.10948	0.16	0.351	0
Sec61b	0	0	-0.760352	0.387	0.578	0
Drg1	0	0	-0.975261	0.208	0.398	0
Ifi209	0	0	1.42202	0.318	0.128	0
Pip4k2a	0	0	0.920331	0.633	0.443	0
Txk	0	0	0.789151	0.503	0.313	0
Fchsd2	0	0	1.2307	0.427	0.237	0
Mien1	0	0	-1.02658	0.183	0.373	0
Sgms1	0	0	0.928813	0.463	0.273	0
Ncl	0	0	-1.13161	0.581	0.77	0
Icos	0	0	-1.72505	0.105	0.294	0
Ube2n	0	0	-0.806309	0.241	0.43	0
Map2k3	0	0	-2.52469	0.049	0.238	0
Hnrnpa1	0	0	-0.706122	0.458	0.647	0
Arhgef6	0	0	1.84892	0.297	0.108	0
Gng5	0	0	-0.686191	0.526	0.715	0
Skil	0	0	-1.31504	0.207	0.395	0
Chmp4b	0	0	-0.834414	0.328	0.516	0
Uqcr10	0	0	-0.92911	0.283	0.471	0
Rflnb	0	0	1.51278	0.305	0.117	0
Nolc1	0	0	-1.31004	0.131	0.319	0
Parp8	0	0	1.29401	0.346	0.158	0
Fam104a	0	0	-0.780372	0.267	0.454	0
Fli1	0	0	0.547415	0.564	0.377	0
Arhgef3	0	0	0.797317	0.586	0.399	0
Stag2	0	0	1.00955	0.549	0.363	0
Znrd1	0	0	-1.13667	0.144	0.33	0
Uqcr11	0	0	-1.06719	0.18	0.366	0
Bcas3	0	0	1.31044	0.374	0.188	0
Apex1	0	0	-1.72863	0.071	0.257	0
Ndufa11	0	0	-0.981	0.173	0.359	0
Atp5b	0	0	-0.838598	0.53	0.716	0
Srsf3	0	0	-0.86449	0.534	0.72	0
Ywhae	0	0	-0.674775	0.352	0.537	0
Eef1e1	0	0	-1.62089	0.086	0.271	0
Cct2	0	0	-0.764001	0.449	0.634	0
Lpp	0	0	1.17991	0.431	0.246	0
Prex1	0	0	1.47514	0.347	0.162	0
Nudt21	0	0	-0.821051	0.234	0.419	0
Ppp1r11	0	0	-1.08162	0.157	0.341	0
Slamf1	0	0	-2.28771	0.061	0.245	0
Ndufb2	0	0	-1.1278	0.133	0.317	0
Csrnp1	0	0	-2.51844	0.075	0.259	0
Smc6	0	0	1.21807	0.504	0.32	0
Pim1	0	0	-1.41353	0.24	0.424	0
Stambpl1	0	0	1.27942	0.376	0.192	0
Strap	0	0	-1.02237	0.168	0.352	0
Thada	0	0	1.04114	0.565	0.381	0
Eif2s2	0	0	-0.703032	0.484	0.667	0
Arf1	0	0	-0.651286	0.357	0.54	0
Timm8b	0	0	-1.35203	0.098	0.281	0
Sar1a	0	0	-1.06798	0.159	0.342	0
Il2rb	0	0	-3.15889	0.019	0.202	0
1810037I17Rik	0	0	-1.05221	0.186	0.369	0
Cdc42se2	0	0	1.08138	0.464	0.281	0
Phb	0	0	-1.38508	0.11	0.293	0
Brk1	0	0	-0.833587	0.229	0.412	0
Ndufs6	0	0	-1.03176	0.168	0.351	0
Chd3	0	0	0.897322	0.661	0.479	0
Fosb	0	0	0.49808	0.339	0.157	0
Vmp1	0	0	-0.821843	0.215	0.397	0
Clk1	0	0	0.567594	0.621	0.439	0
Dut	0	0	-2.11707	0.111	0.293	0
Ptpn1	0	0	-0.768886	0.437	0.619	0
Smc4	0	0	1.11213	0.609	0.427	0
Krtcap2	0	0	-0.774343	0.335	0.517	0
Atp5j2	0	0	-0.807439	0.426	0.608	0
Acp5	0	0	1.48006	0.316	0.134	0
Phf20l1	0	0	0.886873	0.643	0.461	0
Ndufb11	0	0	-0.758983	0.343	0.525	0
Smco4	0	0	-1.40717	0.1	0.282	0
Mrps24	0	0	-0.881326	0.225	0.407	0
Numb	0	0	1.21591	0.413	0.231	0
Mrpl51	0	0	-1.369	0.099	0.28	0
Hdgf	0	0	-0.976384	0.187	0.368	0
Glrx5	0	0	-1.0646	0.149	0.329	0
Cox17	0	0	-0.870062	0.221	0.401	0
Mrps14	0	0	-0.878562	0.199	0.379	0
Mrfap1	0	0	-0.817657	0.24	0.42	0
Tma7	0	0	-0.754038	0.447	0.627	0
Ccm2	0	0	0.985082	0.519	0.339	0
Ikzf1	0	0	1.13063	0.922	0.743	0
Sec61g	0	0	-0.68723	0.356	0.535	0
Arid5b	0	0	-1.06765	0.466	0.645	0
Ptges3	0	0	-0.749274	0.29	0.469	0
Ndufv2	0	0	-0.859442	0.201	0.38	0
Zfp831	0	0	1.60965	0.292	0.114	0
Aurkaip1	0	0	-0.896736	0.178	0.356	0
Znrf2	0	0	1.20498	0.425	0.247	0
Thy1	0	0	0.990432	0.459	0.281	0
Etf1	0	0	-0.698951	0.341	0.519	0
Sik3	0	0	-1.05547	0.397	0.575	0
Socs3	0	0	-2.12057	0.087	0.264	0
Usp25	0	0	1.14586	0.406	0.229	0
Calcrl	0	0	1.92969	0.255	0.078	0
Ttc39b	0	0	-1.07391	0.181	0.358	0
Eif3b	0	0	-0.976363	0.18	0.357	0
Ruvbl1	0	0	-1.53896	0.079	0.256	0
Prdx2	0	0	-0.92809	0.184	0.361	0
Als2cl	0	0	1.38844	0.313	0.136	0
Erh	0	0	-0.935392	0.246	0.423	0
Micos13	0	0	-0.728876	0.26	0.437	0
Ltb	0	0	0.526401	0.858	0.681	0
Rassf2	0	0	1.82775	0.27	0.094	0
Cops6	0	0	-1.14163	0.122	0.298	0
Rev3l	0	0	0.999821	0.489	0.313	0
Pfdn1	0	0	-0.879053	0.18	0.356	0
Gm16286	0	0	-0.744166	0.244	0.42	0
Ndufa1	0	0	-0.77688	0.233	0.409	0
Jpt1	0	0	-0.63525	0.371	0.546	0
Adcy7	0	0	1.56942	0.306	0.131	0
Sun2	0	0	1.01592	0.378	0.203	0
Mrtfa	0	0	0.988983	0.498	0.323	0
Tmem258	0	0	-0.704529	0.294	0.469	0
Anp32b	0	0	-0.806865	0.366	0.54	0
Rab5if	0	0	-0.805687	0.211	0.385	0
Eif3l	0	0	-0.917984	0.168	0.342	0
Hat1	0	0	-1.20255	0.116	0.29	0
Eif4e	0	0	-0.960541	0.173	0.347	0
Add1	0	0	1.31058	0.363	0.189	0
Atf7ip	0	0	1.06669	0.45	0.276	0
Zfp52	0	0	-2.4663	0.038	0.212	0
Lsm2	0	0	-1.15585	0.126	0.299	0
Arf5	0	0	-0.640115	0.532	0.705	0
Ppib	0	0	-0.633884	0.486	0.658	0
Denr	0	0	-1.02191	0.141	0.313	0
Man2a1	0	0	1.51123	0.322	0.15	0
Cd4	0	0	0.999614	0.45	0.278	0
Psmd12	0	0	-0.821924	0.203	0.375	0
Atp5mpl	0	0	-0.584733	0.349	0.52	0
Tlk1	0	0	0.970784	0.508	0.337	0
Usp24	0	0	1.19929	0.426	0.255	0
Srsf1	0	0	-0.908575	0.186	0.357	0
Mia2	0	0	1.057	0.514	0.343	0
Ndufb4	0	0	-0.841349	0.187	0.358	0
Ttc28	0	0	1.5927	0.273	0.103	0
Slc25a3	0	0	-0.664266	0.572	0.742	0
Tomm22	0	0	-0.680258	0.29	0.46	0
Alyref	0	0	-1.05151	0.141	0.311	0
Slc12a7	0	0	1.78357	0.259	0.089	0
Pfdn4	0	0	-1.62852	0.065	0.235	0
9930111J21Rik2	0	0	1.61434	0.255	0.085	0
Arid4a	0	0	0.823295	0.491	0.321	0
Rsl1d1	0	0	-0.792399	0.265	0.435	0
Rer1	0	0	-0.745671	0.235	0.404	0
Tcf7	0	0	0.665634	0.801	0.632	0
Tbca	0	0	-0.630117	0.344	0.513	0
Fkbp4	0	0	-0.882473	0.227	0.396	0
Psme3	0	0	-1.38781	0.094	0.263	0
Lrba	0	0	1.11122	0.478	0.309	0
Zfp292	0	0	1.05978	0.471	0.302	0
Bag1	0	0	-0.803355	0.189	0.358	0
Cyp51	0	0	-1.73761	0.069	0.238	0
Grk6	0	0	1.00869	0.477	0.308	0
Egr3	0	0	-2.79171	0.069	0.238	0
Naa50	0	0	-0.898296	0.189	0.358	0
Cacybp	0	0	-0.82204	0.238	0.406	0
Anp32e	0	0	-0.797808	0.212	0.38	0
Txndc17	0	0	-0.95818	0.147	0.315	0
Fkbp2	0	0	-1.72615	0.059	0.227	0
Bzw1	0	0	-0.577877	0.454	0.622	0
Pabpc4	0	0	-1.1497	0.118	0.286	0
Erp29	0	0	-0.776984	0.242	0.41	0
Relb	0	0	-1.21008	0.122	0.29	0
Gm45716	0	0	-4.34527	0.012	0.18	0
Maml2	0	0	0.868857	0.842	0.674	0
Ncoa2	0	0	0.854372	0.658	0.491	0
Mctp2	0	0	1.6041	0.277	0.11	0
Hint1	0	0	-0.833084	0.476	0.643	0
Psmc3	0	0	-0.728445	0.225	0.392	0
Pla2g12a	0	0	-2.44712	0.033	0.2	0
Exosc3	0	0	-1.00098	0.143	0.31	0
Rab3ip	0	0	1.11477	0.394	0.227	0
Purb	0	0	-0.817251	0.205	0.372	0
Dennd1a	0	0	1.10306	0.471	0.304	0
Eif3m	0	0	-0.585093	0.444	0.611	0
Ubac2	0	0	0.837739	0.611	0.444	0
Pitpnc1	0	0	0.776894	0.825	0.658	0
Mllt3	0	0	0.775083	0.746	0.58	0
Polr2k	0	0	-1.11666	0.109	0.275	0
Calm3	0	0	-0.808513	0.209	0.375	0
Esd	0	0	-0.76991	0.214	0.38	0
Ppp2r5a	0	0	0.876211	0.616	0.45	0
Nop56	0	0	-0.87964	0.198	0.364	0
AI506816	0	0	-1.52055	0.079	0.245	0
Nfkbid	0	0	-2.09789	0.134	0.3	0
Vdac2	0	0	-0.721195	0.253	0.419	0
Dtymk	0	0	-1.27998	0.104	0.269	0
Suco	0	0	0.845564	0.451	0.286	0
Pop5	0	0	-0.784206	0.235	0.4	0
Rgs10	0	0	-0.894652	0.47	0.635	0
Abracl	0	0	-0.602247	0.378	0.543	0
Ddx21	0	0	-0.713144	0.362	0.527	0
Smurf2	0	0	1.25438	0.404	0.239	0
Sat1	0	0	-0.783343	0.285	0.45	0
Zfas1	0	0	-0.951749	0.164	0.329	0
Uqcrfs1	0	0	-0.711405	0.231	0.396	0
Atf4	0	0	-0.916674	0.206	0.371	0
Ctse	0	0	1.27898	0.288	0.123	0
Hsd17b12	0	0	-1.05999	0.14	0.305	0
Atp5l	0	0	-0.600764	0.452	0.617	0
Itsn2	0	0	0.988852	0.499	0.334	0
Umps	0	0	-1.45533	0.076	0.241	0
Hspa9	0	0	-0.767188	0.243	0.408	0
Ifi208	0	0	1.2309	0.266	0.102	0
Snrpd3	0	0	-0.704796	0.383	0.547	0
Tmem14c	0	0	-0.866174	0.206	0.37	0
Mrpl41	0	0	-1.35392	0.082	0.246	0
Card11	0	0	1.0137	0.427	0.263	0
Lsm3	0	0	-1.10177	0.121	0.285	0
Tmem167	0	0	-0.712039	0.236	0.399	0
St13	0	0	-0.659344	0.285	0.448	0
Rnf149	0	0	-2.00196	0.063	0.226	0
Tgfb1	0	0	-0.870987	0.217	0.38	0
Idi1	0	0	-1.92832	0.053	0.216	0
Vcp	0	0	-0.707076	0.266	0.429	0
H2afj	0	0	-0.636611	0.423	0.586	0
Herc1	0	0	1.05985	0.424	0.261	0
Nr3c1	0	0	0.931147	0.488	0.325	0
Ndufb5	0	0	-0.680087	0.237	0.399	0
Elmo1	0	0	0.975628	0.878	0.716	0
Gm47283	0	0	-0.750841	0.282	0.444	0
Tbc1d10c	0	0	1.43942	0.313	0.151	0
Rapgef2	0	0	1.23858	0.344	0.182	0
Cfdp1	0	0	-0.721697	0.201	0.363	0
Xrn1	0	0	1.30901	0.356	0.194	0
Psmb1	0	0	-0.554909	0.409	0.571	0
Bccip	0	0	-1.03859	0.12	0.281	0
Ndufa13	0	0	-0.604109	0.483	0.644	0
Pole4	0	0	-0.766797	0.204	0.365	0
Phactr2	0	0	-2.3572	0.038	0.199	0
Selenof	0	0	-0.597294	0.324	0.485	0
Sdhb	0	0	-0.755177	0.198	0.359	0
Tmem147	0	0	-1.40961	0.079	0.24	0
Ppan	0	0	-1.45234	0.084	0.245	0
G3bp1	0	0	-0.5893	0.411	0.572	0
Ipo5	0	0	-1.11443	0.121	0.282	0
mt-Nd1	0	0	-0.696687	0.688	0.848	0
Timm10	0	0	-1.76735	0.054	0.214	0
Atp6v0b	0	0	-0.940356	0.156	0.316	0
Timm10b	0	0	-0.773464	0.204	0.364	0
Psmc6	0	0	-0.703773	0.213	0.373	0
Ttc7	0	0	1.75945	0.255	0.095	0
Atp5k	0	0	-0.638378	0.276	0.436	0
Trir	0	0	-0.576406	0.331	0.491	0
Phip	0	0	0.993862	0.484	0.324	0
Psmd6	0	0	-0.978077	0.132	0.292	0
Dkc1	0	0	-1.06364	0.128	0.288	0
Lars2	0	0	0.837708	0.703	0.543	0
Ndufa8	0	0	-0.730907	0.211	0.37	0
Sdf2l1	0	0	-2.50967	0.029	0.188	0
Abcg1	0	0	1.45925	0.251	0.092	0
Dynlrb1	0	0	-0.757324	0.194	0.353	0
Atp8a1	0	0	1.12034	0.348	0.189	0
Bri3	0	0	-0.756258	0.2	0.359	0
Snrpa	0	0	-1.36422	0.085	0.244	0
Tmem208	0	0	-0.964042	0.135	0.294	0
Ptbp1	0	0	-0.69223	0.248	0.407	0
Stat1	0	0	0.950017	0.506	0.348	0
Otulinl	0	0	0.988056	0.401	0.243	0
Ybx3	0	0	-3.62321	0.013	0.171	0
Nucks1	0	0	-0.642124	0.321	0.479	0
Lsm4	0	0	-0.610617	0.407	0.565	0
Anxa6	0	0	1.13613	0.345	0.187	0
Gtf2h5	0	0	-0.795939	0.19	0.348	0
Mrpl43	0	0	-0.952322	0.139	0.297	0
Polr2c	0	0	-1.10748	0.106	0.263	0
Dot1l	0	0	-1.43672	0.109	0.266	0
Cct4	0	0	-0.571387	0.373	0.53	0
Uchl3	0	0	-0.854955	0.177	0.334	0
Eif4e2	0	0	-0.709405	0.208	0.365	0
Fam189b	0	0	1.25842	0.302	0.145	0
Ptms	0	0	-2.00661	0.054	0.211	0
Zfp652	0	0	1.35391	0.322	0.165	0
Siva1	0	0	-1.85782	0.053	0.21	0
Mrps36	0	0	-1.21778	0.092	0.249	0
Myc	0	0	-1.99096	0.066	0.223	0
Tgif1	0	0	-2.19931	0.064	0.221	0
Rbm33	0	0	1.05307	0.414	0.257	0
Zfp638	0	0	1.07811	0.468	0.312	0
Galnt7	0	0	1.33298	0.328	0.172	0
Lsm12	0	0	-0.74357	0.187	0.343	0
Smdt1	0	0	-0.615677	0.294	0.45	0
Sod2	0	0	-0.840638	0.177	0.333	0
Birc6	0	0	0.902912	0.653	0.497	0
Ppid	0	0	-1.02396	0.136	0.292	0
Eif3d	0	0	-0.784268	0.197	0.353	0
Sh3pxd2a	0	0	1.82116	0.236	0.08	0
Ctsz	0	0	-1.34959	0.079	0.234	0
Rsrp1	0	0	0.876222	0.554	0.399	0
Uba52	0	0	0.417048	0.795	0.64	0
Sarnp	0	0	-0.542893	0.355	0.51	0
Tespa1	0	0	0.727531	0.397	0.242	0
Drap1	0	0	-0.562531	0.296	0.451	0
Mrpl42	0	0	-0.89488	0.149	0.304	0
Psmd11	0	0	-0.687412	0.221	0.376	0
Mrps7	0	0	-1.21403	0.092	0.247	0
Brix1	0	0	-0.810955	0.168	0.323	0
Timm17b	0	0	-1.16825	0.1	0.255	0
Tmem160	0	0	-0.746993	0.194	0.349	0
Pde4d	0	0	1.00318	0.345	0.19	0
H2-Q7	0	0	0.493354	0.707	0.552	0
Ier5	0	0	-0.934875	0.353	0.507	0
Klhdc1	0	0	1.83955	0.233	0.079	0
Trim12a	0	0	0.970466	0.309	0.155	0
Washc4	0	0	1.3381	0.318	0.164	0
Senp7	0	0	1.30597	0.317	0.163	0
Prkar1a	0	0	-0.552447	0.342	0.496	0
Spcs3	0	0	-1.03207	0.12	0.273	0
Eif1b	0	0	-0.748353	0.182	0.335	0
Il31ra	0	0	1.4103	0.34	0.187	0
Selenop	0	0	1.37006	0.269	0.116	0
Gfer	0	0	-1.26778	0.081	0.234	0
Epc1	0	0	0.823331	0.451	0.298	0
Lsm5	0	0	-0.84082	0.16	0.313	0
Wdr18	0	0	-1.45514	0.069	0.222	0
Rtraf	0	0	-0.595613	0.28	0.433	0
Nipbl	0	0	0.765462	0.701	0.548	0
Srp9	0	0	-0.499045	0.349	0.501	0
Nudt5	0	0	-1.35265	0.073	0.225	0
Naa20	0	0	-1.02788	0.11	0.262	0
Arid1a	0	0	0.886518	0.515	0.363	0
Mrps12	0	0	-1.03593	0.116	0.268	0
Tcf12	0	0	0.926393	0.68	0.528	0
Acap2	0	0	1.25137	0.339	0.187	0
Mrpl11	0	0	-1.08513	0.102	0.254	0
Rtn3	0	0	-0.615547	0.315	0.467	0
Aimp1	0	0	-0.626352	0.218	0.37	0
Prelid1	0	0	-0.689347	0.217	0.369	0
Clip1	0	0	1.26614	0.344	0.192	0
Znrf1	0	0	0.788158	0.563	0.411	0
Pabpn1	0	0	-0.547184	0.318	0.47	0
Eif3k	0	0	-0.55087	0.544	0.696	0
Phf3	0	0	0.944821	0.468	0.317	0
Spata5	0	0	-0.817245	0.301	0.452	0
Fryl	0	0	0.732749	0.517	0.366	0
Cyld	0	0	0.968449	0.44	0.289	0
Nt5dc1	0	0	1.2772	0.328	0.177	0
Mrpl36	0	0	-1.05347	0.104	0.255	0
Mbnl2	0	0	0.59219	0.447	0.296	0
Hspa4l	0	0	-1.65782	0.099	0.25	0
Exosc8	0	0	-0.838747	0.156	0.307	0
Chchd4	0	0	-2.0662	0.038	0.189	0
Mbd3	0	0	-0.812312	0.162	0.313	0
Ostc	0	0	-0.722004	0.198	0.349	0
Galnt6	0	0	0.897497	0.412	0.261	0
Ikbke	0	0	1.44982	0.262	0.112	0
Set	0	0	-0.86897	0.527	0.677	0
Romo1	0	0	-0.757383	0.18	0.33	0
Bola2	0	0	-0.590174	0.308	0.458	0
Mrpl23	0	0	-0.619436	0.246	0.396	0
Tmed9	0	0	-0.542435	0.364	0.514	0
Rgcc	0	0	-0.96571	0.344	0.494	0
Atp6v0e	0	0	-0.519969	0.371	0.521	0
Rilpl2	0	0	-1.91691	0.064	0.214	0
Ap2s1	0	0	-0.844045	0.15	0.3	0
Gcsh	0	0	-2.17473	0.034	0.184	0
Snrpc	0	0	-0.774062	0.159	0.309	0
Arpp19	0	0	-0.545447	0.325	0.475	0
Nifk	0	0	-1.28621	0.084	0.233	0
Ssb	0	0	-0.497325	0.377	0.526	0
Itga6	0	0	1.0111	0.342	0.193	0
Vps29	0	0	-0.965338	0.117	0.266	0
Kdelr2	0	0	-1.30577	0.08	0.229	0
Ncor1	0	0	0.795368	0.746	0.597	0
Lrrc59	0	0	-1.35636	0.075	0.224	0
Atad2b	0	0	1.1018	0.391	0.242	0
Btf3	0	0	-1.0149	0.74	0.889	0
Ddx58	0	0	1.53283	0.218	0.069	0
Trim14	0	0	2.09458	0.206	0.057	0
Diaph2	0	0	1.03072	0.469	0.32	0
Ubc	0	0	-0.803283	0.671	0.82	0
Mrpl30	0	0	-0.544013	0.283	0.431	0
Rbpj	0	0	-1.11481	0.125	0.273	0
4930417O13Rik	0	0	-1.38397	0.105	0.253	0
Tm2d3	0	0	-1.31231	0.078	0.226	0
Irf2	0	0	0.86508	0.445	0.297	0
Ciao2b	0	0	-0.950389	0.122	0.27	0
Cbl	0	0	0.946871	0.457	0.309	0
Scaper	0	0	1.22049	0.335	0.187	0
Ranbp9	0	0	1.12148	0.397	0.249	0
Ak6	0	0	-1.82229	0.044	0.192	0
Tbc1d5	0	0	1.27656	0.383	0.235	0
Eif1a	0	0	-1.1438	0.108	0.256	0
Prkd2	0	0	1.04405	0.362	0.214	0
Mapre1	0	0	-0.555985	0.279	0.427	0
Ak2	0	0	-0.919709	0.136	0.284	0
Elavl1	0	0	-0.552078	0.271	0.419	0
Oprm1	0	0	0.236343	0.472	0.324	0
Ndufa7	0	0	-0.539931	0.325	0.473	0
Emg1	0	0	-0.491445	0.348	0.495	0
Lat	0	0	-0.644205	0.644	0.791	0
Slc25a4	0	0	-0.822517	0.186	0.333	0
Tsn	0	0	-0.615833	0.231	0.378	0
Hypk	0	0	-1.19324	0.097	0.244	0
Psmd13	0	0	-0.843631	0.141	0.288	0
Irf8	0	0	-4.86229	0.008	0.155	0
Cisd1	0	0	-1.56216	0.061	0.208	0
Dnajb11	0	0	-0.882735	0.156	0.303	0
Rpl9-ps6	0	0	-1.22373	0.092	0.239	0
Smg1	0	0	0.798009	0.609	0.462	0
Dazap1	0	0	-0.677693	0.2	0.347	0
Mrps21	0	0	-0.705589	0.183	0.329	0
Spcs1	0	0	-0.743666	0.172	0.318	0
Rps19bp1	0	0	-1.59368	0.053	0.199	0
Prdx6	0	0	-0.514266	0.45	0.596	0
Crip1	0	0	0.493	0.561	0.416	0
Cers6	0	0	1.44878	0.267	0.122	0
Crlf2	0	0	-1.10456	0.129	0.274	0
Snrpg	0	0	-0.648193	0.637	0.782	0
Pam16	0	0	-1.23154	0.082	0.227	0
Stip1	0	0	-0.755324	0.18	0.325	0
Pdcd1	0	0	-4.74231	0.006	0.151	0
Hspa14	0	0	-0.811501	0.152	0.297	0
Acot7	0	0	-3.28576	0.014	0.159	0
Chst2	0	0	-9.15696	0	0.145	0
Mdm4	0	0	1.03773	0.418	0.273	0
Rbbp7	0	0	-0.690241	0.2	0.345	0
Ifi206	0	0	1.0153	0.247	0.103	0
Atp5e	0	0	-0.661987	0.617	0.761	0
Srpk2	0	0	0.843412	0.393	0.249	0
Aimp2	0	0	-1.58483	0.054	0.198	0
Cstb	0	0	-1.24566	0.087	0.231	0
Nol7	0	0	-0.574937	0.401	0.545	0
Sod1	0	0	-0.893325	0.136	0.28	0
Kdm6a	0	0	0.841141	0.454	0.31	0
Cntrl	0	0	0.984699	0.377	0.233	0
Tfdp1	0	0	-1.54679	0.061	0.205	0
Slc16a10	0	0	-1.78081	0.065	0.209	0
Cdc34	0	0	-1.50031	0.067	0.211	0
Snrnp40	0	0	-0.701253	0.176	0.319	0
Mrps33	0	0	-0.637084	0.188	0.331	0
Uqcrc2	0	0	-0.558896	0.25	0.393	0
Vdac3	0	0	-0.850124	0.131	0.274	0
Oaz1	0	0	-0.807474	0.781	0.924	0
Metap2	0	0	-0.660247	0.194	0.337	0
Rassf3	0	0	1.24147	0.261	0.118	0
Psmd3	0	0	-1.00078	0.114	0.257	0
Fam172a	0	0	0.912207	0.612	0.469	0
Ndufaf2	0	0	-1.19805	0.077	0.22	0
Cinp	0	0	-2.02832	0.036	0.179	0
Gfod1	0	0	-2.71949	0.036	0.179	0
Nsun2	0	0	-0.849066	0.148	0.291	0
Mrpl18	0	0	-0.835253	0.168	0.311	0
Aff3	0	0	0.633688	0.803	0.661	0
Lypd6b	0	0	2.99578	0.167	0.025	0
Mrps28	0	0	-0.633709	0.186	0.328	0
Rps17	0	0	-1.17331	0.793	0.935	0
Lsm1	0	0	-0.826135	0.134	0.276	0
Rbmxl1	0	0	-0.901262	0.122	0.264	0
Fdx2	0	0	-1.03887	0.107	0.249	0
Ddt	0	0	-1.39706	0.115	0.257	0
Nme2	0	0	-1.34216	0.694	0.836	0
Txnl4a	0	0	-1.01935	0.106	0.248	0
Dnajc2	0	0	-0.612013	0.212	0.354	0
Bcl7c	0	0	-1.11357	0.093	0.235	0
Ssbp4	0	0	-0.876031	0.148	0.29	0
Rnps1	0	0	-0.757141	0.158	0.3	0
Prdx5	0	0	-0.64005	0.206	0.348	0
Spcs2	0	0	-0.556998	0.429	0.571	0
Utp11	0	0	-0.87862	0.124	0.265	0
Yrdc	0	0	-1.12436	0.107	0.248	0
Mrps18c	0	0	-0.901464	0.118	0.259	0
Kdm2b	0	0	-1.12916	0.175	0.316	0
Arhgdib	0	0	0.75572	0.839	0.698	0
Uvrag	0	0	0.960713	0.449	0.308	0
Atp5h	0	0	-0.630921	0.613	0.754	0
Dcun1d5	0	0	-0.581598	0.229	0.37	0
Snhg15	0	0	-1.49901	0.07	0.211	0
Timm9	0	0	-1.06107	0.098	0.239	0
Hspa5	0	0	-0.695875	0.49	0.63	0
Rbis	0	0	-0.696642	0.178	0.318	0
Cdk6	0	0	-1.58428	0.076	0.216	0
Timm50	0	0	-1.56152	0.054	0.194	0
Ccdc124	0	0	-1.03741	0.104	0.244	0
Rwdd1	0	0	-0.603076	0.203	0.343	0
Shmt1	0	0	-3.01029	0.016	0.156	0
Ccdc58	0	0	-1.07936	0.09	0.23	0
Eif2s3x	0	0	-0.643201	0.185	0.325	0
Zmynd8	0	0	1.06774	0.367	0.227	0
Tnfrsf9	0	0	-4.03684	0.014	0.154	0
Pop7	0	0	-1.33896	0.067	0.207	0
1810058I24Rik	0	0	-0.61581	0.218	0.358	0
Tbcb	0	0	-1.02294	0.097	0.237	0
Cdv3	0	0	-0.646904	0.228	0.368	0
Timp2	0	0	-1.4106	0.096	0.236	0
Mrps18a	0	0	-1.04106	0.096	0.236	0
Rinl	0	0	0.946972	0.412	0.272	0
Ssbp1	0	0	-0.651862	0.179	0.318	0
Cenpx	0	0	-0.690165	0.174	0.313	0
Ppp3cc	0	0	1.61779	0.257	0.118	0
Tnf	0	0	-2.33405	0.079	0.218	0
Crem	0	0	-1.78922	0.087	0.226	0
Ost4	0	0	-0.570704	0.231	0.37	0
Arpc4	0	0	-0.622494	0.206	0.345	0
Arih2	0	0	-1.05286	0.233	0.372	0
Rnaseh2c	0	0	-0.645568	0.206	0.345	0
Gimap8	0	0	0.906069	0.41	0.271	0
Dgkd	0	0	0.851424	0.484	0.346	0
Mbnl1	0	0	0.961526	0.954	0.816	0
Kars	0	0	-1.26879	0.076	0.214	0
Nubp1	0	0	-0.932452	0.109	0.247	0
Ms4a6b	0	0	0.533363	0.759	0.621	0
Pten	0	0	0.949822	0.397	0.259	0
Sde2	0	0	-0.94041	0.151	0.289	0
Rrp1	0	0	-0.645627	0.213	0.351	0
Zcrb1	0	0	-0.725012	0.151	0.289	0
Parp4	0	0	1.09044	0.278	0.141	0
4930444A19Rik	0	0	0.70774	0.391	0.254	0
Mcm6	0	0	-1.29827	0.078	0.215	0
Slc41a1	0	0	-2.41555	0.043	0.18	0
Trpm7	0	0	0.877337	0.458	0.321	0
Nxt1	0	0	-1.23995	0.071	0.208	0
Mrpl35	0	0	-1.11694	0.08	0.217	0
Akt2	0	0	-0.998378	0.124	0.261	0
Rpf2	0	0	-1.27924	0.076	0.213	0
Ly6a	0	0	-2.00716	0.258	0.395	0
Rrp1b	0	0	-1.25609	0.086	0.223	0
Ppm1b	0	0	0.953385	0.387	0.25	0
Lmnb1	0	0	-1.16525	0.103	0.24	0
Cox8a	0	0	-0.681032	0.65	0.787	0
Dctn3	0	0	-0.691632	0.163	0.3	0
Ube2h	0	0	0.394059	0.592	0.455	0
Atrx	0	0	0.839984	0.577	0.44	0
Mapkapk2	0	0	-0.995765	0.133	0.269	0
Traf5	0	0	1.62648	0.232	0.096	0
Lsm8	0	0	-0.842261	0.131	0.267	0
Ier2	0	0	-0.943951	0.542	0.678	0
Snf8	0	0	-0.818084	0.13	0.266	0
Cmss1	0	0	1.08064	0.97	0.834	0
Ndufc1	0	0	-0.715443	0.147	0.283	0
Pkn1	0	0	1.1881	0.301	0.165	0
Ctla2a	0	0	-4.24457	0.013	0.149	0
Nfatc1	0	0	-0.936426	0.23	0.366	0
Stk17b	0	0	0.359811	0.704	0.569	0
Tet3	0	0	0.986114	0.401	0.266	0
Chchd10	0	0	-1.1985	0.084	0.219	0
Ndufs7	0	0	-0.594441	0.203	0.338	0
Stat3	0	0	-0.908865	0.372	0.507	0
Fmnl1	0	0	1.13703	0.308	0.173	0
Psmg4	0	0	-0.862292	0.124	0.259	0
Mrps18b	0	0	-1.29898	0.068	0.203	0
Dtx1	0	0	2.17754	0.175	0.04	0
Itpr1	0	0	0.99554	0.345	0.21	0
Atp1b1	0	0	1.23924	0.249	0.115	0
Tipin	0	0	-1.58534	0.054	0.188	0
Tomm70a	0	0	-0.644029	0.186	0.32	0
Ndufb3	0	0	-0.601655	0.229	0.363	0
Arhgap30	0	0	1.00099	0.367	0.233	0
Tcf20	0	0	0.813678	0.57	0.436	0
Psmd1	0	0	-0.74287	0.147	0.28	0
Cdc26	0	0	-0.737881	0.143	0.276	0
Imp4	0	0	-1.0188	0.102	0.235	0
Id3	0	0	-1.19584	0.129	0.262	0
Ftl1	0	0	-0.903726	0.803	0.936	0
Mrpl34	0	0	-0.855784	0.13	0.263	0
Erg28	0	0	-0.957948	0.101	0.234	0
Gnl1	0	0	-1.11865	0.095	0.228	0
Gpx1	0	0	-0.642518	0.229	0.362	0
Gtpbp4	0	0	-0.62629	0.223	0.356	0
Tspan5	0	0	-0.745757	0.182	0.314	0
Pik3cd	0	0	0.783285	0.496	0.364	0
Bud31	0	0	-0.945677	0.111	0.243	0
Trim28	0	0	-0.940152	0.109	0.241	0
Hcst	0	0	0.62635	0.517	0.385	0
Nfatc3	0	0	0.900087	0.457	0.325	0
Slc19a1	0	0	-2.27582	0.027	0.159	0
Dph3	0	0	-1.14397	0.083	0.215	0
Cd2ap	0	0	0.990993	0.426	0.294	0
Dpy30	0	0	-0.857557	0.116	0.248	0
Vps13a	0	0	1.03127	0.385	0.253	0
Ppp1r15a	0	0	0.619391	0.292	0.16	0
Slbp	0	0	-0.847071	0.143	0.274	0
Ssr1	0	0	-0.761763	0.144	0.275	0
Nck2	0	0	1.52718	0.24	0.109	0
Gnas	0	0	-0.400307	0.57	0.701	0
Jtb	0	0	-0.771107	0.136	0.267	0
Rpp25l	0	0	-1.06083	0.084	0.215	0
Stoml2	0	0	-1.29417	0.065	0.196	0
Spata6	0	0	1.66854	0.204	0.073	0
Atpif1	0	0	-1.10746	0.085	0.216	0
Gimap6	0	0	0.397563	0.805	0.674	0
Mcm2	0	0	-1.52893	0.052	0.183	0
Nfkbib	0	0	-1.36763	0.075	0.206	0
Rsl24d1	0	0	-0.878307	0.119	0.25	0
Rrp9	0	0	-1.28368	0.08	0.211	0
Jmjd1c	0	0	0.532561	0.524	0.393	0
Xbp1	0	0	-1.37762	0.077	0.208	0
Ckb	0	0	-1.96078	0.039	0.17	0
Pdcd6	0	0	-0.592338	0.195	0.326	0
Mcts1	0	0	-0.617463	0.175	0.306	0
Slc1a5	0	0	-0.837685	0.151	0.282	0
Ccdc59	0	0	-0.698503	0.153	0.284	0
Pde7a	0	0	1.13417	0.321	0.191	0
Ddost	0	0	-0.826675	0.124	0.254	0
Sh3rf1	0	0	-1.83246	0.05	0.18	0
Cyb5b	0	0	-0.612119	0.188	0.318	0
Ddit4	0	0	1.76945	0.215	0.085	0
Tsfm	0	0	-1.28605	0.06	0.19	0
Mettl1	0	0	-1.29365	0.072	0.202	0
Sema4d	0	0	0.748762	0.435	0.305	0
Vps13b	0	0	0.900068	0.466	0.336	0
Bin2	0	0	0.865703	0.431	0.301	0
Mrpl28	0	0	-1.10516	0.08	0.21	0
Relch	0	0	1.2565	0.295	0.165	0
Taok3	0	0	1.04038	0.35	0.22	0
Bmt2	0	0	1.1575	0.282	0.152	0
Ntrk3	0	0	2.14138	0.172	0.042	0
Exosc7	0	0	-0.694452	0.159	0.289	0
Tanc1	0	0	1.47463	0.234	0.105	0
Avl9	0	0	1.04852	0.308	0.179	0
Tnrc6a	0	0	0.88018	0.453	0.324	0
Thyn1	0	0	-1.60665	0.048	0.177	0
Setd2	0	0	0.929645	0.377	0.248	0
Lsm7	0	0	-0.838958	0.119	0.248	0
Peli1	0	0	0.745877	0.779	0.65	0
Mybbp1a	0	0	-0.924039	0.118	0.247	0
Gm15283	0	0	-0.861537	0.163	0.292	0
Hprt	0	0	-0.643601	0.168	0.297	0
Txndc9	0	0	-0.697502	0.149	0.277	0
Prelid3b	0	0	-1.39696	0.058	0.186	0
Prkacb	0	0	1.1863	0.306	0.178	0
Mrps25	0	0	-0.953163	0.093	0.221	0
Iqgap1	0	0	0.781036	0.483	0.355	0
Agpat5	0	0	-0.917953	0.107	0.235	0
Txnrd1	0	0	-0.863905	0.127	0.255	0
Mir142hg	0	0	-0.452255	0.668	0.796	0
Mrpl32	0	0	-0.862836	0.105	0.233	0
Pgp	0	0	-1.02396	0.095	0.223	0
Prpf19	0	0	-0.92996	0.111	0.239	0
Ccnd2	0	0	-0.710933	0.446	0.574	0
Sertad1	0	0	-1.24396	0.125	0.252	0
Saraf	0	0	0.289858	0.656	0.529	0
Hpf1	0	0	-0.80141	0.117	0.244	0
Arl1	0	0	-0.998578	0.093	0.22	0
Guk1	0	0	-0.81506	0.116	0.243	0
Gphn	0	0	0.777962	0.67	0.543	0
Nop16	0	0	-1.86534	0.035	0.162	0
Nol12	0	0	-1.08732	0.081	0.208	0
Pim3	0	0	-1.78344	0.053	0.18	0
Polr1c	0	0	-1.36392	0.063	0.19	0
Ahsa1	0	0	-0.677184	0.165	0.292	0
Fnbp1	0	0	0.55646	0.538	0.412	0
Uchl5	0	0	-0.899758	0.101	0.227	0
Fam241a	0	0	-1.30419	0.074	0.2	0
Ust	0	0	-1.02763	0.316	0.442	0
Acap1	0	0	1.06333	0.312	0.186	0
Fam49a	0	0	1.2544	0.247	0.121	0
Ppp1r21	0	0	1.89093	0.196	0.07	0
Zdhhc15	0	0	2.14825	0.18	0.054	0
Il16	0	0	1.18774	0.287	0.161	0
Ash1l	0	0	0.742027	0.577	0.451	0
Zcchc7	0	0	0.767416	0.674	0.549	0
Rbl2	0	0	1.47654	0.221	0.096	0
Zwint	0	0	-0.938303	0.106	0.231	0
Nlk	0	0	0.737156	0.504	0.379	0
Exosc4	0	0	-0.979236	0.089	0.214	0
Gsk3b	0	0	0.883897	0.422	0.297	0
Ndufs8	0	0	-0.962014	0.093	0.218	0
Eif1ad	0	0	-1.28584	0.061	0.186	0
Sbno2	0	0	-1.4709	0.079	0.204	0
Cd84	0	0	1.03598	0.294	0.169	0
Ptpra	0	0	1.05963	0.35	0.225	0
Kdm4c	0	0	1.20011	0.285	0.16	0
Ppp1r12a	0	0	0.722876	0.579	0.454	0
M6pr	0	0	-0.791764	0.142	0.266	0
Rnh1	0	0	-0.977241	0.103	0.227	0
Akt3	0	0	0.854894	0.452	0.328	0
Rrp15	0	0	-1.24316	0.068	0.192	0
Dpp4	0	0	1.97412	0.18	0.056	0
Emc7	0	0	-0.748353	0.13	0.254	0
Snrpb2	0	0	-0.881381	0.1	0.224	0
Il27ra	0	0	0.960356	0.376	0.252	0
Wdr61	0	0	-0.878555	0.1	0.224	0
Clic1	0	0	-0.556466	0.634	0.758	0
mt-Nd4l	0	0	1.26548	0.303	0.179	0
Ssrp1	0	0	-0.649337	0.158	0.282	0
Cnp	0	0	1.14466	0.273	0.15	0
Cdca7	0	0	-2.99743	0.013	0.136	0
Clpp	0	0	-0.883538	0.105	0.228	0
Ctla4	0	0	-1.85229	0.039	0.162	0
Lap3	0	0	-1.8162	0.036	0.159	0
Lrrc8c	0	0	0.790634	0.388	0.265	0
Foxp1	0	0	0.928995	0.97	0.847	0
Adarb1	0	0	-3.94809	0.007	0.13	0
Rap1b	0	0	0.63107	0.79	0.667	0
Acp1	0	0	-0.951761	0.088	0.211	0
Sp4	0	0	0.819345	0.302	0.179	0
Phf14	0	0	1.11767	0.345	0.222	0
Tnfrsf18	0	0	-0.908548	0.141	0.263	0
Tox	0	0	0.414015	0.664	0.542	0
Cox7c	0	0	-0.570131	0.626	0.748	0
Lbr	0	0	0.960594	0.35	0.228	0
Eif4a3	0	0	-0.657503	0.151	0.272	0
Samm50	0	0	-0.654419	0.148	0.269	0
Elof1	0	0	-1.04075	0.075	0.196	0
Tmem256	0	0	-1.58637	0.043	0.164	0
Bex3	0	0	-0.923144	0.107	0.228	0
Lamtor5	0	0	-0.748986	0.12	0.241	0
Akna	0	0	1.17811	0.249	0.128	0
Rere	0	0	0.886884	0.413	0.292	0
Kdm7a	0	0	0.629795	0.428	0.307	0
Herc2	0	0	1.07922	0.304	0.183	0
Cog5	0	0	0.885657	0.421	0.3	0
Eef1d	0	0	-0.571852	0.632	0.753	0
Rasal3	0	0	0.805199	0.407	0.286	0
Eef1g	0	0	-1.03215	0.76	0.881	0
Tnrc6c	0	0	0.672686	0.548	0.428	0
Arid4b	0	0	0.554675	0.553	0.433	0
Rictor	0	0	0.740471	0.404	0.284	0
Mpc1	0	0	-0.660286	0.148	0.268	0
AW554918	0	0	1.25907	0.273	0.153	0
Trnau1ap	0	0	-0.828578	0.106	0.226	0
Mrps17	0	0	-0.811985	0.103	0.223	0
Emc8	0	0	-1.03635	0.077	0.197	0
Tmem11	0	0	-0.84074	0.107	0.227	0
Crim1	0	0	1.22532	0.222	0.102	0
Gpcpd1	0	0	0.926062	0.306	0.186	0
2900097C17Rik	0	0	-0.852037	0.121	0.241	0
Wrn	0	0	1.34781	0.254	0.134	0
Insyn2b	0	0	0.652773	0.377	0.257	0
Tbc1d4	0	0	-1.58836	0.06	0.18	0
Ext1	0	0	-0.692905	0.511	0.631	0
9130401M01Rik	0	0	-1.30882	0.058	0.178	0
Pglyrp2	0	0	2.04916	0.16	0.04	0
Zmat2	0	0	-0.665294	0.134	0.254	0
Prpf31	0	0	-1.10951	0.073	0.192	0
Mier1	0	0	0.821924	0.462	0.343	0
Bicra	0	0	1.27936	0.246	0.127	0
Inpp4b	0	0	0.929606	0.968	0.849	0
Ifrd2	0	0	-1.70082	0.039	0.158	0
Akap8l	0	0	1.20785	0.243	0.124	0
Bloc1s2	0	0	-0.740135	0.13	0.249	0
Magohb	0	0	-2.29489	0.022	0.14	0
Cops5	0	0	-0.807955	0.104	0.222	0
Sh3bp2	0	0	-3.15878	0.015	0.133	0
Tfrc	0	0	-1.14356	0.078	0.196	0
Rpl31	0	0	-0.71645	0.783	0.901	0
Bcl2	0	0	1.07772	0.595	0.477	0
Tbl1xr1	0	0	1.12047	0.309	0.191	0
Ift80	0	0	1.37673	0.241	0.123	0
Zyg11b	0	0	1.02083	0.293	0.175	0
Herc6	0	0	1.59813	0.184	0.066	0
Atm	0	0	1.36654	0.249	0.131	0
Slirp	0	0	-1.22904	0.059	0.177	0
Rreb1	0	0	1.30784	0.257	0.139	0
Gmfb	0	0	-0.707397	0.138	0.256	0
Psmg1	0	0	-1.1507	0.067	0.185	0
Trp53inp1	0	0	-0.871286	0.221	0.338	0
Gfi1	0	0	-3.38832	0.012	0.129	0
Fh1	0	0	-1.07819	0.067	0.184	0
Kmt5a	0	0	-0.826653	0.101	0.218	0
Rpn1	0	0	-0.921873	0.099	0.216	0
Dop1a	0	0	1.37142	0.239	0.122	0
Ddx1	0	0	-0.834848	0.1	0.217	0
Mylip	0	0	1.09354	0.211	0.094	0
Gm10076	0	0	0.348828	0.853	0.736	0
Psmd2	0	0	-0.668894	0.139	0.256	0
Fundc2	0	0	-0.704424	0.129	0.246	0
Ythdc1	0	0	0.617938	0.525	0.409	0
Orc6	0	0	-1.36005	0.054	0.17	0
Mcm3	0	0	-1.57153	0.048	0.164	0
Hras	0	0	-0.989443	0.079	0.195	0
Mrpl13	0	0	-0.955779	0.079	0.195	0
Dusp1	0	0	1.01398	0.198	0.082	0
Nub1	0	0	0.897177	0.298	0.182	0
Arhgap25	0	0	0.911041	0.295	0.179	0
Ruvbl2	0	0	-1.207	0.061	0.177	0
Sept1	0	0	0.809685	0.427	0.311	0
Nsd3	0	0	0.386536	0.712	0.596	0
Chd9	0	0	1.38068	0.242	0.126	0
Commd1	0	0	-0.691935	0.121	0.237	0
Slfn1	0	0	0.873202	0.303	0.187	0
Itgb3	0	0	1.98749	0.157	0.041	0
Satb1	0	0	0.210852	0.929	0.814	0
Kat2b	0	0	0.918055	0.326	0.211	0
Ubl4a	0	0	-0.971672	0.087	0.202	0
Acss2	0	0	2.03796	0.161	0.046	0
Il21	0	0	-10.986	0	0.115	0
Mogs	0	0	-1.10259	0.073	0.188	0
Homer1	0	0	-1.76589	0.074	0.189	0
Plp2	0	0	-2.62569	0.018	0.133	0
Arid5a	0	0	-1.02288	0.172	0.287	0
Ralgapa2	0	0	0.912282	0.361	0.246	0
Sec13	0	0	-0.93094	0.089	0.204	0
Cdh23	0	0	-1.11369	0.138	0.253	0
Pnp	0	0	-1.30693	0.063	0.178	0
Got1	0	0	-1.00659	0.093	0.208	0
Hdac8	0	0	1.02537	0.311	0.196	0
Fam107b	0	0	0.665911	0.58	0.465	0
Dusp2	0	0	-0.973809	0.415	0.529	0
Dgkz	0	0	1.07214	0.277	0.163	0
Gbp8	0	0	1.60621	0.169	0.055	0
Nudcd2	0	0	-0.912019	0.088	0.202	0
Nin	0	0	1.12113	0.275	0.161	0
Alg5	0	0	-0.786469	0.111	0.225	0
P4hb	0	0	-0.776624	0.113	0.227	0
Alcam	0	0	-3.86825	0.009	0.123	0
Samsn1	0	0	-1.80592	0.085	0.199	0
Arl3	0	0	-1.50303	0.044	0.158	0
Zswim6	0	0	-0.934315	0.397	0.511	0
Cd47	0	0	0.538177	0.64	0.526	0
Map3k2	0	0	0.91448	0.308	0.194	0
Rcl1	0	0	-0.941428	0.096	0.21	0
Pdcd1lg2	0	0	-4.33068	0.006	0.12	0
Gmfg	0	0	0.50161	0.561	0.448	0
Nr4a2	0	0	-3.72304	0.025	0.138	0
Cks1b	0	0	-2.91997	0.012	0.125	0
Ppie	0	0	-0.772429	0.104	0.217	0
Smn1	0	0	-1.06427	0.073	0.186	0
Mrpl40	0	0	-0.942371	0.077	0.19	0
Phgdh	0	0	-0.728028	0.123	0.236	0
Ugcg	0	0	0.607289	0.47	0.357	0
Uqcrh	0	0	-0.427683	0.737	0.85	0
Rhoh	0	0	0.700174	0.511	0.398	0
Mcm7	0	0	-1.20553	0.062	0.175	0
3110082I17Rik	0	0	-1.10543	0.098	0.211	0
Psmg3	0	0	-1.65184	0.036	0.149	0
Ctsd	0	0	0.996221	0.292	0.179	0
Ranbp10	0	0	1.10171	0.252	0.139	0
Cdk19	0	0	0.953807	0.298	0.185	0
Map2k6	0	0	2.60836	0.143	0.03	0
2610035D17Rik	0	0	0.953749	0.307	0.194	0
Kat6a	0	0	0.89915	0.345	0.232	0
Cnot6l	0	0	0.530786	0.56	0.448	0
Tax1bp1	0	0	0.581612	0.533	0.421	0
Cnn2	0	0	0.648601	0.554	0.442	0
Stmn1	0	0	-1.48475	0.113	0.225	0
Sfxn1	0	0	-0.769468	0.102	0.214	0
Jakmip1	0	0	1.23119	0.206	0.094	0
Gtf2i	0	0	0.791164	0.438	0.326	0
Shmt2	0	0	-1.91817	0.029	0.141	0
Rfx7	0	0	0.809537	0.458	0.347	0
Zc3h7a	0	0	0.885693	0.321	0.21	0
Hist1h1c	0	0	2.1667	0.161	0.05	0
Atg101	0	0	-1.07939	0.109	0.22	0
Arpc2	0	0	-0.465955	0.752	0.863	0
Ubr3	0	0	1.01777	0.302	0.191	0
Zfp644	0	0	0.789577	0.429	0.318	0
Ezh2	0	0	-0.924487	0.101	0.212	0
Gimap3	0	0	0.586815	0.603	0.492	0
Cpm	0	0	1.22615	0.21	0.099	0
Pdlim4	0	0	1.50245	0.177	0.066	0
Prpf39	0	0	1.05473	0.284	0.173	0
Prkch	0	0	0.590047	0.769	0.658	0
Tnks2	0	0	0.691361	0.506	0.395	0
Grcc10	0	0	0.654827	0.545	0.435	0
St6galnac4	0	0	-2.16133	0.026	0.136	0
Bod1l	0	0	0.947721	0.322	0.212	0
Sumo3	0	0	-0.717559	0.119	0.229	0
Eif4enif1	0	0	-0.787187	0.11	0.22	0
Pno1	0	0	-1.35072	0.049	0.159	0
Gmnn	0	0	-1.61909	0.047	0.157	0
2210016F16Rik	0	0	-0.763982	0.105	0.215	0
Pcca	0	0	1.38631	0.227	0.117	0
Mbd5	0	0	0.89159	0.388	0.278	0
Gm12840	0	0	-1.40921	0.101	0.211	0
Cnbp	0	0	-0.383762	0.609	0.719	0
Mcm5	0	0	-1.80443	0.031	0.141	0
Tasor	0	0	0.821816	0.38	0.27	0
Dyrk1a	0	0	0.630923	0.471	0.361	0
Psmb9	0	0	0.838187	0.38	0.27	0
Cd274	0	0	-1.38733	0.096	0.206	0
Tubb5	0	0	-0.729414	0.564	0.673	0
Syne1	0	0	1.85158	0.163	0.054	0
Ppp1r13b	0	0	0.791112	0.319	0.21	0
Slc28a2	0	0	1.51942	0.183	0.074	0
Etfb	0	0	-0.81133	0.085	0.194	0
Anapc15	0	0	-1.33876	0.047	0.156	0
Isyna1	0	0	-1.06979	0.077	0.186	0
Mthfd1	0	0	-0.917359	0.08	0.189	0
Wipf1	0	0	0.631336	0.452	0.343	0
Clns1a	0	0	-0.804951	0.099	0.208	0
Serinc3	0	0	0.744913	0.331	0.223	0
Pole3	0	0	-1.70424	0.031	0.139	0
Mrpl55	0	0	-1.1794	0.054	0.162	0
Zzef1	0	0	1.04687	0.264	0.156	0
Syngr2	0	0	-1.27315	0.054	0.162	0
Ppil1	0	0	-1.24888	0.052	0.16	0
Arhgap4	0	0	1.16579	0.231	0.123	0
Tent5c	0	0	1.30536	0.214	0.106	0
Sit1	0	0	1.83944	0.152	0.044	0
Snhg3	0	0	-1.00103	0.084	0.192	0
Abcf2	0	0	-0.750668	0.106	0.214	0
Fam136a	0	0	-1.24811	0.05	0.158	0
Gm19951	0	0	2.51889	0.143	0.035	0
Rac2	0	0	0.562642	0.794	0.686	0
Sash3	0	0	1.1899	0.24	0.132	0
Plk3	0	0	-1.70954	0.062	0.169	0
Pcm1	0	0	0.959296	0.323	0.216	0
Fyco1	0	0	1.79533	0.169	0.062	0
Polr3k	0	0	-0.867199	0.077	0.184	0
Ide	0	0	-0.890352	0.083	0.19	0
Med29	0	0	-1.10494	0.066	0.173	0
Cox4i1	0	0	-0.568587	0.749	0.856	0
Elf1	0	0	0.368467	0.63	0.523	0
Bbx	0	0	0.686061	0.304	0.197	0
Fbxl17	0	0	0.840262	0.475	0.368	0
Mark2	0	0	0.749632	0.424	0.317	0
Ssbp3	0	0	1.00014	0.277	0.171	0
Sdhd	0	0	-0.788188	0.089	0.195	0
Mapkapk3	0	0	-1.10355	0.091	0.197	0
Gtf3c6	0	0	-0.870688	0.089	0.195	0
Fam13b	0	0	0.803642	0.322	0.216	0
Smad4	0	0	0.782512	0.337	0.231	0
Hells	0	0	-2.06133	0.026	0.132	0
Utp4	0	0	-0.987137	0.084	0.19	0
Slfn8	0	0	1.11537	0.19	0.084	0
Cltb	0	0	-0.852839	0.102	0.208	0
Snhg4	0	0	-1.40266	0.048	0.154	0
Ankib1	0	0	0.905625	0.352	0.246	0
Man1a2	0	0	0.842436	0.39	0.285	0
Ddx60	0	0	2.27055	0.13	0.025	0
Slfn5	0	0	1.13748	0.17	0.065	0
Ncbp2	0	0	-1.01177	0.065	0.17	0
Neat1	0	0	0.858304	0.269	0.164	0
Psat1	0	0	-1.96225	0.024	0.129	0
Flna	0	0	0.855308	0.322	0.217	0
Dnlz	0	0	-1.4138	0.043	0.148	0
Hectd4	0	0	1.28148	0.215	0.11	0
Bola3	0	0	-0.716752	0.099	0.204	0
Idh3a	0	0	-0.98873	0.07	0.175	0
Stag1	0	0	0.665823	0.661	0.556	0
Trip11	0	0	0.833556	0.385	0.28	0
Serbp1	0	0	-0.655552	0.688	0.792	0
Mkln1	0	0	0.796529	0.395	0.291	0
Gtdc1	0	0	0.886674	0.312	0.208	0
Vps13d	0	0	1.03497	0.246	0.142	0
Aen	0	0	-1.27455	0.059	0.163	0
E130307A14Rik	0	0	1.43514	0.197	0.093	0
St3gal1	0	0	1.02383	0.233	0.129	0
Ccdc86	0	0	-1.17532	0.065	0.169	0
Creg1	0	0	-0.943803	0.074	0.178	0
Mrpl27	0	0	-0.903457	0.072	0.176	0
Tuba1c	0	0	-1.22848	0.073	0.177	0
Ubash3a	0	0	1.22234	0.215	0.111	0
Cd320	0	0	-2.29806	0.019	0.123	0
Mrpl14	0	0	-0.779807	0.084	0.188	0
Patj	0	0	0.909941	0.242	0.138	0
Mrpl46	0	0	-0.905735	0.07	0.174	0
Zfp771	0	0	-1.42997	0.04	0.144	0
Myh9	0	0	0.547373	0.734	0.63	0
Shisa5	0	0	0.593963	0.919	0.816	0
Kansl1	0	0	0.597792	0.671	0.568	0
Exoc6b	0	0	0.889473	0.327	0.224	0
Ccpg1	0	0	1.50696	0.165	0.062	0
Rfc4	0	0	-1.63369	0.032	0.135	0
Spry1	0	0	-5.18965	0.003	0.106	0
Pou2af1	0	0	-2.88549	0.015	0.118	0
Wdr74	0	0	-0.878085	0.085	0.188	0
Nek7	0	0	0.894251	0.356	0.253	0
Bcl3	0	0	-1.85507	0.039	0.142	0
Tacc1	0	0	0.859581	0.302	0.199	0
Kidins220	0	0	0.904302	0.288	0.185	0
Eif4a2	0	0	0.676971	0.509	0.406	0
Esco1	0	0	0.771795	0.357	0.254	0
Wdr75	0	0	-0.780465	0.095	0.197	0
Akap9	0	0	0.946748	0.314	0.212	0
Pmpcb	0	0	-0.792393	0.086	0.188	0
Cdk2ap1	0	0	-1.64567	0.035	0.137	0
Eif2ak3	0	0	1.36774	0.189	0.087	0
Tmem97	0	0	-2.79307	0.013	0.115	0
Mtmr12	0	0	0.89798	0.257	0.155	0
Plec	0	0	1.0762	0.22	0.118	0
Mrpl2	0	0	-0.939245	0.069	0.171	0
Lipa	0	0	1.68152	0.157	0.055	0
Dennd2d	0	0	1.26558	0.218	0.116	0
Bud23	0	0	-0.877844	0.078	0.18	0
Nop2	0	0	-1.42537	0.044	0.146	0
Shprh	0	0	1.40403	0.215	0.113	0
Mrpl16	0	0	-1.32529	0.048	0.15	0
Sf3b1	0	0	0.601085	0.709	0.607	0
Lims1	0	0	0.743939	0.409	0.307	0
Arhgap9	0	0	0.933658	0.295	0.193	0
Npc2	0	0	0.481035	0.77	0.668	0
Lrch3	0	0	0.727945	0.426	0.324	0
Cdk13	0	0	0.666828	0.452	0.351	0
Rps6ka3	0	0	0.580806	0.559	0.458	0
Rfc3	0	0	-2.03286	0.022	0.123	0
Polr2i	0	0	-0.978418	0.064	0.165	0
Uri1	0	0	1.0359	0.311	0.21	0
Usp28	0	0	1.29219	0.198	0.097	0
Hmg20a	0	0	1.20548	0.223	0.122	0
Mindy2	0	0	1.06303	0.231	0.13	0
Nlrc3	0	0	1.66188	0.164	0.063	0
Pbdc1	0	0	-0.770323	0.088	0.189	0
Eya2	0	0	2.68901	0.12	0.019	0
2010016I18Rik	0	0	1.87806	0.15	0.049	0
Gadd45g	0	0	-2.95485	0.018	0.119	0
Slc25a12	0	0	1.1968	0.228	0.128	0
Rpa3	0	0	-1.01098	0.063	0.163	0
Cish	0	0	-2.64524	0.017	0.117	0
Aarsd1	0	0	-0.763288	0.086	0.186	0
Ktn1	0	0	1.01526	0.311	0.211	0
Mtss1	0	0	1.04857	0.252	0.152	0
Ccdc50	0	0	-1.698	0.033	0.133	0
Rnf126	0	0	-0.881278	0.085	0.185	0
Prrg1	0	0	2.20671	0.145	0.045	0
Cnot11	0	0	-1.19817	0.056	0.155	0
Itpa	0	0	-1.07001	0.054	0.153	0
Pus1	0	0	-0.997361	0.07	0.169	0
Dohh	0	0	-1.22446	0.053	0.152	0
Arhgap5	0	0	1.41546	0.185	0.086	0
Kmt2d	0	0	1.08217	0.223	0.124	0
Fen1	0	0	-1.63701	0.032	0.131	0
Ecm1	0	0	-1.86021	0.044	0.143	0
Mrpl53	0	0	-0.813989	0.078	0.177	0
Tle5	0	0	0.524899	0.648	0.549	0
Bptf	0	0	0.666263	0.475	0.376	0
H3f3a	0	0	-0.618592	0.824	0.922	0
Mllt10	0	0	0.653102	0.535	0.437	0
Thoc3	0	0	-0.924124	0.073	0.171	0
Nsd2	0	0	-1.03897	0.064	0.162	0
Parp11	0	0	1.52038	0.167	0.069	0
Lig1	0	0	-1.89939	0.026	0.124	0
Tdrp	0	0	1.51926	0.151	0.053	0
Eea1	0	0	-2.10852	0.023	0.121	0
Mmd	0	0	-1.4176	0.062	0.16	0
Fhit	0	0	1.52805	0.191	0.093	0
Prkdc	0	0	1.39239	0.212	0.114	0
Rock1	0	0	0.497897	0.652	0.554	0
Rorc	0	0	-9.22585	0	0.097	0
Ctps	0	0	-0.9646	0.065	0.162	0
Tyms	0	0	-2.93978	0.013	0.11	0
Cox19	0	0	-1.16791	0.055	0.152	0
Grwd1	0	0	-1.69424	0.032	0.129	0
Rcbtb1	0	0	1.04182	0.247	0.15	0
Strn3	0	0	0.66331	0.476	0.379	0
Zfp148	0	0	0.766704	0.436	0.339	0
Mrpl50	0	0	-1.23628	0.043	0.139	0
Sh2d3c	0	0	1.72546	0.153	0.057	0
Tnfrsf1b	0	0	-2.06297	0.037	0.133	0
Mdfic	0	0	-2.59947	0.015	0.111	0
Sema7a	0	0	-6.41898	0.001	0.097	0
Ngly1	0	0	1.2146	0.223	0.127	0
Gnpnat1	0	0	-1.00756	0.064	0.16	0
Bysl	0	0	-1.14699	0.053	0.149	0
Atp5g2	0	0	-0.46323	0.628	0.724	0
Ascc3	0	0	0.582324	0.53	0.435	0
Stk39	0	0	1.16063	0.224	0.129	0
Emc4	0	0	-0.924743	0.07	0.165	0
Jagn1	0	0	-1.0368	0.058	0.153	0
Smpdl3a	0	0	1.34567	0.16	0.065	0
Top2a	0	0	-3.39427	0.013	0.108	0
Exoc4	0	0	0.52381	0.618	0.523	0
Nt5e	0	0	-1.67464	0.043	0.137	0
Zmynd19	0	0	-1.49858	0.034	0.128	0
Hltf	0	0	1.19161	0.212	0.118	0
Epop	0	0	-2.22449	0.019	0.113	0
Ftsj3	0	0	-1.00892	0.066	0.16	0
Snx29	0	0	1.48886	0.163	0.069	0
AI467606	0	0	1.12789	0.208	0.114	0
Psmb8	0	0	0.486928	0.615	0.521	0
Cdkal1	0	0	0.820236	0.394	0.301	0
Plagl2	0	0	-1.41566	0.041	0.134	0
Ppih	0	0	-1.01508	0.054	0.147	0
A630023P12Rik	0	0	2.00291	0.135	0.042	0
Msra	0	0	1.11032	0.218	0.125	0
Coro7	0	0	1.50867	0.161	0.068	0
Nfkb2	0	0	-1.36956	0.052	0.145	0
Rell1	0	0	1.1582	0.177	0.084	0
Ifnar1	0	0	1.00397	0.207	0.114	0
Kpna4	0	0	0.531376	0.58	0.487	0
Laptm5	0	0	0.50037	0.717	0.624	0
Cd55	0	0	1.21626	0.168	0.076	0
Gm16337	0	0	1.18079	0.167	0.075	0
Kti12	0	0	-0.979982	0.07	0.162	0
Cad	0	0	-1.5677	0.031	0.123	0
Tma16	0	0	-1.47398	0.037	0.129	0
Mrps22	0	0	-1.19289	0.042	0.134	0
Nup43	0	0	-1.44145	0.032	0.124	0
Map3k8	0	0	-2.26898	0.024	0.116	0
Vma21	0	0	-1.10831	0.052	0.144	0
Ly75	0	0	1.33792	0.174	0.082	0
Orai2	0	0	1.11666	0.197	0.106	0
Atg10	0	0	1.51571	0.165	0.074	0
Dzip1	0	0	2.20082	0.117	0.026	0
Sco2	0	0	-1.31887	0.046	0.137	0
Rrs1	0	0	-0.979272	0.063	0.154	0
Gm12185	0	0	1.26441	0.147	0.056	0
Gm26917	0	0	0.655228	0.583	0.492	0
Bcl9	0	0	1.52651	0.161	0.071	0
Noc4l	0	0	-1.75755	0.027	0.117	0
4933406I18Rik	0	0	1.53051	0.167	0.077	0
Rcc1	0	0	-1.77666	0.025	0.115	0
Gm20559	0	0	1.14182	0.153	0.063	0
Sik1	0	0	1.04593	0.164	0.075	0
Sgk3	0	0	1.45452	0.157	0.068	0
Gm42722	0	0	1.38297	0.151	0.062	0
Xylt1	0	0	1.07518	0.188	0.099	0
Ormdl2	0	0	-0.915872	0.063	0.152	0
Zfand3	0	0	0.607202	0.513	0.425	0
Sf3b4	0	0	-1.01767	0.059	0.147	0
Yif1b	0	0	-1.21233	0.044	0.131	0
Il18r1	0	0	1.85056	0.12	0.033	0
Gata3	0	0	1.78956	0.121	0.034	0
Elovl6	0	0	-1.72304	0.056	0.143	0
Twsg1	0	0	-1.4794	0.041	0.128	0
Marcksl1	0	0	-3.24089	0.01	0.096	0
Cd200	0	0	-2.03529	0.027	0.113	0
Mir155hg	0	0	-3.2179	0.012	0.098	0
Cd3eap	0	0	-1.31128	0.042	0.128	0
Myd88	0	0	-1.11539	0.06	0.146	0
Srpk1	0	0	0.629628	0.537	0.452	0
Mafg	0	0	-1.79628	0.027	0.112	0
Slc5a3	0	0	-1.7309	0.031	0.116	0
Prkd3	0	0	1.23598	0.17	0.085	0
Gm14085	0	0	1.51217	0.151	0.066	0
Fam49b	0	0	0.570896	0.719	0.634	0
Mgst2	0	0	1.18371	0.163	0.079	0
Rrad	0	0	-1.77364	0.06	0.144	0
Pclaf	0	0	-6.68581	0.002	0.086	0
Rangrf	0	0	-2.1064	0.018	0.102	0
Pou2f2	0	0	-1.44108	0.051	0.134	0
Tubb2a	0	0	-1.51036	0.057	0.14	0
Auts2	0	0	1.44005	0.16	0.077	0
Itpr3	0	0	1.25157	0.166	0.083	0
Smyd2	0	0	-1.59671	0.025	0.108	0
Spred1	0	0	-1.3677	0.04	0.123	0
Cluh	0	0	-1.23301	0.041	0.124	0
Znhit3	0	0	-1.35641	0.035	0.118	0
Ipo4	0	0	-1.83233	0.025	0.108	0
Ptbp3	0	0	0.515474	0.638	0.555	0
Prpf4b	0	0	0.624322	0.521	0.439	0
Nop9	0	0	-1.09919	0.049	0.131	0
Hlcs	0	0	1.41824	0.164	0.082	0
Sigmar1	0	0	-1.21182	0.044	0.125	0
Rad51b	0	0	-1.88191	0.017	0.098	0
Mboat1	0	0	1.52545	0.152	0.071	0
Comtd1	0	0	-1.6196	0.026	0.107	0
Sema4a	0	0	1.55415	0.122	0.041	0
H3f3b	0	0	-0.894969	0.9	0.981	0
Rundc3b	0	0	1.34532	0.135	0.055	0
Acss1	0	0	2.05743	0.108	0.028	0
Thop1	0	0	-2.77923	0.009	0.089	0
Uhrf1	0	0	-4.44242	0.003	0.083	0
1190007I07Rik	0	0	-1.07244	0.041	0.121	0
Ydjc	0	0	-1.70628	0.023	0.103	0
Ptpn18	0	0	0.455418	0.716	0.636	0
Serf2	0	0	-0.409582	0.784	0.864	0
Maff	0	0	-1.79974	0.054	0.133	0
Ddr1	0	0	-2.07725	0.022	0.101	0
Nup62	0	0	-1.40004	0.031	0.11	0
Gins2	0	0	-1.7776	0.019	0.098	0
Icam1	0	0	-2.10639	0.029	0.108	0
Atp2a3	0	0	1.34239	0.15	0.071	0
Cdkn1a	0	0	-6.03938	0.001	0.08	0
Ankrd11	0	0	0.332501	0.76	0.681	0
Arsb	0	0	1.60182	0.138	0.06	0
Nelfe	0	0	-1.23715	0.035	0.113	0
Zc3h6	0	0	1.79144	0.117	0.04	0
Nudt1	0	0	-1.47587	0.024	0.101	0
Tmem238	0	0	-1.61542	0.023	0.1	0
Ifit2	0	0	1.77022	0.116	0.039	0
Gab3	0	0	1.72196	0.117	0.04	0
Plekho1	0	0	-2.73177	0.012	0.089	0
Abcg3	0	0	2.6525	0.095	0.018	0
Syce2	0	0	-3.61403	0.005	0.082	0
Litaf	0	0	-2.51967	0.015	0.092	0
Gm12216	0	0	1.55193	0.118	0.041	0
Cpd	0	0	-5.40614	0.001	0.077	0
Prrc2c	0	0	0.454242	0.751	0.675	0
Bcat1	0	0	-5.252	0.001	0.076	0
Egln3	0	0	-3.58267	0.005	0.08	0
Cracr2a	0	0	1.57785	0.128	0.054	0
Dhfr	0	0	-2.36496	0.01	0.084	0
Card6	0	0	1.28851	0.132	0.058	0
Zfp948	0	0	-3.23002	0.008	0.082	0
Hk2	0	0	-4.62719	0.002	0.076	0
Smyd5	0	0	-1.88795	0.021	0.095	0
Prim1	0	0	-1.08284	0.033	0.107	0
Serpinb6a	0	0	1.71826	0.119	0.045	0
Alpk2	0	0	-4.13202	0.004	0.078	0
Smyd3	0	0	0.539901	0.586	0.512	0
AY036118	0	0	0.950952	0.99	0.916	0
Eif4ebp1	0	0	-1.62096	0.022	0.095	0
Sqle	0	0	-1.42918	0.032	0.105	0
Pycrl	0	0	-1.25303	0.031	0.104	0
2010204K13Rik	0	0	-2.08006	0.014	0.087	0
Myl6	0	0	-0.562316	0.833	0.905	0
Itm2b	0	0	0.365988	0.779	0.707	0
Pgap1	0	0	1.36087	0.122	0.05	0
Rgs16	0	0	-6.1513	0.001	0.073	0
Bcl2a1d	0	0	-3.9628	0.005	0.077	0
Sorl1	0	0	1.65359	0.114	0.043	0
Fez2	0	0	1.4137	0.123	0.052	0
Mad2l2	0	0	-1.34501	0.029	0.099	0
Rtn4rl1	0	0	1.96137	0.099	0.029	0
Cdc42ep3	0	0	1.44435	0.115	0.045	0
Emp1	0	0	-4.39603	0.003	0.073	0
Rnf144a	0	0	1.78556	0.103	0.033	0
Birc5	0	0	-6.43895	0.001	0.07	0
Ninj1	0	0	-1.58954	0.023	0.092	0
Coq7	0	0	-1.63132	0.019	0.088	0
Spc24	0	0	-4.66625	0.002	0.071	0
Stx11	0	0	-3.61647	0.004	0.073	0
Frmd4b	0	0	-2.82819	0.014	0.082	0
Abhd14a	0	0	-2.07416	0.014	0.082	0
Hspa1b	0	0	1.77703	0.092	0.024	0
Actr3	0	0	0.523652	0.78	0.713	0
Alad	0	0	-1.53175	0.02	0.087	0
Ywhaz	0	0	0.552995	0.642	0.576	0
Rrm2	0	0	-4.07661	0.004	0.07	0
Calm1	0	0	-0.326349	0.8	0.866	0
Lck	0	0	0.427968	0.675	0.61	0
Gm16083	0	0	2.11952	0.086	0.021	0
Pusl1	0	0	-1.59968	0.021	0.086	0
Tpr	0	0	0.444948	0.711	0.646	0
Tra2b	0	0	0.414015	0.699	0.634	0
Klhl3	0	0	1.75055	0.092	0.028	0
Hsp90ab1	0	0	-0.876562	0.887	0.951	0
Sorcs2	0	0	1.89775	0.089	0.026	0
Cenpw	0	0	-1.87777	0.015	0.078	0
Apol7e	0	0	2.26008	0.083	0.02	0
Rpl36al	0	0	-0.550056	0.865	0.927	0
Fgf2	0	0	-4.94045	0.002	0.064	0
Lag3	0	0	-6.90828	0	0.062	0
Tmie	0	0	1.73669	0.097	0.035	0
E2f1	0	0	-2.65794	0.006	0.067	0
Ahr	0	0	-2.80684	0.009	0.07	0
Dtl	0	0	-1.78174	0.013	0.074	0
Tent5a	0	0	1.74006	0.093	0.032	0
Rragd	0	0	-2.56162	0.012	0.072	0
Rexo5	0	0	1.89582	0.087	0.027	0
Xaf1	0	0	1.52975	0.087	0.027	0
Tet1	0	0	2.69858	0.07	0.011	0
Ggt5	0	0	1.74926	0.085	0.026	0
Tox2	0	0	-5.95113	0.001	0.06	0
Nefh	0	0	-2.20409	0.01	0.068	0
Cdk1	0	0	-5.56343	0.001	0.059	0
Fxyd5	0	0	-0.536475	0.845	0.902	0
Gbp9	0	0	1.62946	0.083	0.026	0
Slc9b2	0	0	-5.24788	0.001	0.058	0
Ncapg2	0	0	-2.76027	0.005	0.062	0
Rad51	0	0	-3.04095	0.004	0.061	0
Mgll	0	0	-4.46867	0.002	0.059	0
Dnph1	0	0	-5.97653	0.001	0.057	0
Lgals7	0	0	-3.96288	0.004	0.06	0
Coro1a	0	0	0.409827	0.931	0.876	0
Morrbid	0	0	-4.77327	0.002	0.057	0
Hist1h1b	0	0	-4.86312	0.002	0.057	0
Cenph	0	0	-3.60514	0.003	0.058	0
Cdca8	0	0	-3.29319	0.004	0.059	0
Rpl7a	0	0	-0.678123	0.909	0.964	0
Rbm39	0	0	0.405644	0.854	0.8	0
Cenps	0	0	-2.8598	0.004	0.057	0
Socs2	0	0	-6.50459	0.001	0.054	0
Atp2b4	0	0	-3.73066	0.003	0.054	0
Lif	0	0	-7.49628	0	0.05	0
Cdc45	0	0	-2.87444	0.004	0.054	0
Phlda3	0	0	-4.10009	0.002	0.052	0
Cd3d	0	0	-0.388068	0.819	0.868	0
Bdh2	0	0	-9.24198	0	0.048	0
Clspn	0	0	-3.34962	0.002	0.049	0
Hspa8	0	0	-0.835963	0.918	0.965	0
Slamf7	0	0	-3.96841	0.002	0.048	0
Rpl22l1	0	0	-0.395057	0.824	0.869	0
Npm1	0	0	-0.969591	0.9	0.945	0
Ncs1	0	0	-5.24948	0.001	0.045	0
BC147527	0	0	2.96109	0.051	0.007	0
Rps25	0	0	-0.745723	0.939	0.982	0
Srrm2	0	0	0.386845	0.846	0.805	0
Camk1d	0	0	1.86021	0.999	0.959	0
Fth1	0	0	-0.378318	0.918	0.956	0
Eif1	0	0	-0.807644	0.954	0.99	0
Naca	0	0	-0.516303	0.917	0.952	0
Ubb	0	0	-0.46786	0.946	0.98	0
H2-K1	0	0	0.432344	0.991	0.957	0
Rpl23a	0	0	-0.561449	0.948	0.98	0
Rpl10	0	0	-0.441269	0.949	0.981	0
Ptma	0	0	-1.16361	0.963	0.992	0
H2-D1	0	0	0.277138	0.981	0.952	0
Rpl4	0	0	-0.316294	0.932	0.958	0
Ddx5	0	0	0.208499	0.975	0.951	0
Eef1b2	0	0	-0.572325	0.959	0.982	0
Rps6	0	0	-0.61292	0.964	0.984	0
Ppia	0	0	-0.701803	0.94	0.96	0
Tmsb10	0	0	0.4056	0.997	0.978	0
Rpl27	0	0	-0.524997	0.968	0.987	0
Rps2	0	0	-0.948555	0.978	0.996	0
Rpl29	0	0	-0.392912	0.967	0.984	0
Rpl14	0	0	-0.638424	0.976	0.989	0
Pfn1	0	0	-0.315699	0.913	0.925	0
Rpl26	0	0	-0.581877	0.982	0.993	0
Rps15	0	0	-0.316667	0.982	0.992	0
Rpl22	0	0	-0.315793	0.973	0.982	0
Rpl24	0	0	-0.684089	0.986	0.995	0
mt-Co2	0	0	-0.43737	0.982	0.991	0
Rps12	0	0	-0.774782	0.988	0.996	0
Rpl41	0	0	-0.591237	0.989	0.997	0
Rps26	0	0	-0.460857	0.986	0.994	0
Rack1	0	0	-0.428426	0.985	0.993	0
Rpl5	0	0	-0.332425	0.99	0.996	0
Rplp2	0	0	-0.448686	0.992	0.998	0
Tmsb4x	0	0	0.341087	1	0.994	0
Rps18	0	0	-0.645935	0.992	0.997	0
Rpl36	0	0	-0.18752	0.99	0.995	0
Rpl7	0	0	-0.54086	0.993	0.997	0
Rpl15	0	0	-0.564637	0.993	0.996	0
Rps27	0	0	0.295346	0.999	0.997	0
Rpl34	0	0	-0.232284	0.995	0.997	0
Rpl28	0	0	-0.556852	0.997	0.999	0
Rpl10a	0	0	-0.250287	0.991	0.993	0
Gm42418	0	0	1.76845	1	0.998	0
Malat1	0	0	1.28621	1	0.998	0
Rps21	0	0	0.274161	0.998	0.997	0
Rps20	0	0	-0.235559	1	0.999	0
Rpl6	0	0	-0.295431	0.997	0.998	0
Rps5	0	0	-0.172988	0.997	0.998	0
Rps19	0	0	-0.234357	0.999	1	0
Rpl13a	0	0	-0.283951	0.997	0.998	0
Rps13	0	0	-0.389204	0.998	0.999	0
Rps27a	0	0	-0.423436	0.999	1	0
Rps29	0	0	0.146382	1	0.999	0
Rps23	0	0	-0.394301	0.997	0.998	0
Rpl3	0	0	-0.275931	0.992	0.993	0
Rps10	0	0	-0.224087	1	0.999	0
Rps14	0	0	-0.388002	0.997	0.998	0
mt-Co3	0	0	-0.221839	0.998	0.997	0
Rps8	0	0	-0.216311	1	1	0
Rpl11	0	0	-0.322833	0.999	0.999	0
Rpl9	0	0	-0.263377	0.999	0.999	0
Rplp0	0	0	-0.266234	1	1	0
Rpl32	0	0	-0.421526	0.999	0.999	0
Rps9	0	0	-0.265412	0.998	0.998	0
Rpl18	0	0	-0.205006	0.999	0.999	0
Rps3	0	0	-0.308242	0.999	0.999	0
Rpl27a	0	0	-0.281724	1	1	0
Rpl13	0	0	-0.259123	1	1	0
Rplp1	0	0	-0.241793	1	1	0
Eef1a1	0	0	0.156131	1	1	0
Rpsa	0	0	-0.289195	0.999	0.999	0
Rpl23	0	0	-0.261107	1	1	0
Rpl19	0	0	-0.15222	1	1	0
Tpt1	0	0	-0.270984	1	1	0
Rpl8	0	0	-0.215824	0.999	0.999	0
Ehd1	0	7.04044e-308	-1.84399	0.021	0.084	2.27301e-303
Helz	0	7.1015e-308	0.773608	0.347	0.244	2.29272e-303
Adss	0	9.1634e-308	-0.568793	0.253	0.391	2.9584e-303
Nubp2	0	2.20575e-307	-1.0097	0.048	0.129	7.12128e-303
Serp1	0	2.68866e-307	-0.647676	0.178	0.303	8.68035e-303
Ikzf3	0	4.94865e-307	-0.691457	0.275	0.405	1.59767e-302
Med7	0	7.03566e-307	-1.389	0.04	0.115	2.27146e-302
Pan3	0	7.78875e-307	0.458007	0.563	0.467	2.5146e-302
Elf4	0	1.17556e-306	0.960674	0.259	0.162	3.7953e-302
Rwdd4a	0	1.48706e-306	-0.882695	0.07	0.162	4.80096e-302
Ubash3b	0	2.31627e-306	-1.0041	0.216	0.331	7.47808e-302
Foxk1	0	6.36964e-306	1.14902	0.215	0.126	2.05644e-301
Eef1akmt1	0	7.11265e-306	-0.768519	0.087	0.186	2.29632e-301
Lamtor1	0	9.02937e-306	-0.588572	0.19	0.321	2.91513e-301
Ppif	0	1.41982e-305	-1.01357	0.053	0.136	4.58387e-301
Gps1	0	1.42519e-305	-0.898223	0.069	0.16	4.60124e-301
Canx	0	2.62496e-305	-0.563088	0.291	0.43	8.47467e-301
Dusp16	0	3.83539e-305	-2.00504	0.022	0.086	1.23826e-300
Oxct1	0	4.11193e-305	0.859029	0.336	0.239	1.32754e-300
Slc16a5	0	6.1008e-305	3.20416	0.04	0.004	1.96964e-300
Fam207a	0	8.09313e-305	-0.818827	0.078	0.172	2.61287e-300
Thoc7	0	1.20039e-304	-0.534534	0.241	0.38	3.87546e-300
Srsf6	0	2.1411e-304	-0.518196	0.274	0.415	6.91256e-300
Creld2	0	3.55905e-304	-1.51607	0.027	0.093	1.14904e-299
Ndufs3	0	6.33946e-304	-0.581375	0.183	0.311	2.0467e-299
Nab2	0	3.15438e-303	-1.14968	0.063	0.148	1.01839e-298
Raver2	0	4.54181e-303	1.66288	0.08	0.025	1.46632e-298
Lta	0	6.24408e-303	-1.95287	0.027	0.094	2.0159e-298
Hsd17b10	0	6.92863e-303	-0.667008	0.14	0.257	2.23691e-298
Sap30	0	8.06313e-303	-2.02017	0.012	0.067	2.60318e-298
Ccna2	0	8.21601e-303	-5.73244	0	0.042	2.65254e-298
Tmed2	0	9.5958e-303	-0.503239	0.316	0.462	3.098e-298
Glrx2	0	1.77863e-302	-0.690854	0.108	0.215	5.7423e-298
Hsbp1	0	2.78272e-302	-0.630743	0.182	0.308	8.98402e-298
Ufm1	0	9.21639e-302	-0.771478	0.085	0.182	2.97551e-297
Mki67	0	1.71421e-301	-3.63404	0.003	0.048	5.53431e-297
Ptrh2	0	2.08926e-301	-0.987149	0.047	0.127	6.74518e-297
Elp5	0	4.55684e-301	-1.01083	0.056	0.139	1.47117e-296
Srp14	0	4.56984e-301	-0.500061	0.312	0.456	1.47537e-296
Hspa1a	0	7.59309e-301	1.49297	0.085	0.027	2.45143e-296
Nrip1	0	1.25298e-300	0.737304	0.372	0.269	4.04524e-296
Lgals9	0	1.37704e-300	1.12264	0.186	0.1	4.44578e-296
Tiam1	0	1.75904e-300	-1.60804	0.017	0.076	5.67905e-296
Ahi1	0	2.08111e-300	-1.16211	0.047	0.126	6.71885e-296
Itch	0	3.43372e-300	0.793794	0.364	0.267	1.10858e-295
Lrrc1	0	8.57123e-300	1.39539	0.16	0.081	2.76722e-295
Mpc2	0	9.82129e-300	-0.570335	0.172	0.297	3.1708e-295
Tmlhe	0	1.04256e-299	1.42148	0.131	0.059	3.36591e-295
Jpt2	0	1.4283e-299	-1.1979	0.029	0.098	4.61126e-295
Chd6	0	1.49061e-299	0.785833	0.332	0.23	4.81244e-295
Bri3bp	0	2.4286e-299	-0.905059	0.055	0.139	7.84074e-295
Snhg6	0	4.96833e-299	-0.749221	0.111	0.217	1.60403e-294
Nasp	0	8.22975e-299	-0.556159	0.261	0.398	2.65697e-294
Rnf7	0	1.55078e-298	-0.616577	0.147	0.265	5.00668e-294
Med28	0	4.46261e-298	-0.653289	0.129	0.242	1.44075e-293
A630089N07Rik	0	8.8669e-298	-0.980342	0.048	0.128	2.86268e-293
Cdc6	0	1.11065e-297	-3.09075	0.003	0.048	3.58573e-293
Gm27008	0	1.19624e-297	-1.41525	0.046	0.122	3.86207e-293
Pfas	0	1.32182e-297	-1.42579	0.023	0.086	4.26751e-293
Zfp280d	0	4.65205e-297	0.801846	0.378	0.286	1.50191e-292
Cetn4	0	9.98922e-297	-6.67583	0	0.041	3.22502e-292
Ptprc	0	1.89927e-296	0.153883	0.975	0.954	6.1318e-292
Rrm1	0	2.40591e-296	-1.00747	0.051	0.132	7.76747e-292
Atf6	0	7.23307e-296	-1.38481	0.03	0.098	2.3352e-291
Carhsp1	0	2.03448e-295	-1.81186	0.016	0.074	6.56831e-291
Rpl17	0	3.69955e-295	-0.148985	0.999	0.999	1.1944e-290
Prf1	0	3.71332e-295	1.61156	0.079	0.024	1.19885e-290
Zmym2	0	4.58951e-295	0.923281	0.281	0.185	1.48172e-290
Traf4	0	7.95807e-295	-1.08057	0.064	0.149	2.56926e-290
Znhit1	0	2.15818e-294	-0.950252	0.049	0.129	6.96768e-290
Hist1h2ap	0	5.31806e-294	-2.3847	0.017	0.075	1.71694e-289
Bub3	0	1.11392e-293	-0.578386	0.177	0.301	3.59629e-289
Bop1	0	1.14073e-293	-0.886311	0.071	0.16	3.68284e-289
Pde12	0	1.60329e-293	-1.15518	0.056	0.138	5.17622e-289
Naf1	0	2.45152e-293	-1.18318	0.039	0.113	7.91473e-289
Ilf3	0	2.46249e-293	-0.780137	0.134	0.242	7.95016e-289
Tpcn1	0	2.95274e-293	1.54661	0.106	0.042	9.53293e-289
Pou2f1	0	3.2694e-293	0.885734	0.289	0.192	1.05553e-288
Trmt112	0	7.06519e-293	-0.483857	0.343	0.482	2.281e-288
Bola1	0	7.76212e-293	-1.00768	0.044	0.121	2.506e-288
Rin3	0	1.44849e-292	1.10623	0.193	0.108	4.67644e-288
Rcc2	0	1.48692e-292	-0.525303	0.265	0.402	4.80052e-288
Kif15	0	1.76009e-292	-3.61396	0.002	0.045	5.68244e-288
Ptp4a1	0	1.77709e-292	3.34175	0.038	0.004	5.73735e-288
Gpsm3	0	2.97419e-292	0.611756	0.408	0.3	9.60217e-288
Adamts6	0	4.57762e-292	-1.23989	0.221	0.322	1.47788e-287
Tsta3	0	6.75703e-292	-0.927837	0.067	0.154	2.18151e-287
Pde6h	0	9.29358e-292	1.99959	0.071	0.021	3.00043e-287
Rad51ap1	0	1.11396e-291	-4.38928	0.001	0.043	3.59643e-287
Nr2c2	0	2.40959e-291	0.799152	0.345	0.248	7.77935e-287
Smchd1	0	2.51882e-291	0.323627	0.637	0.554	8.13201e-287
Osbpl8	0	3.99187e-291	0.478916	0.519	0.426	1.28878e-286
Myo1c	0	6.11169e-291	-2.56588	0.008	0.057	1.97316e-286
Vipr1	0	7.97446e-291	1.08928	0.167	0.085	2.57455e-286
Ung	0	9.30433e-291	-1.09462	0.036	0.108	3.0039e-286
Gm39323	0	1.47984e-290	1.63728	0.12	0.053	4.77765e-286
Hmgcs1	0	3.40696e-290	-1.08757	0.075	0.163	1.09994e-285
Gch1	0	3.57629e-290	-1.4331	0.13	0.222	1.15461e-285
Ubxn1	0	3.616e-290	-0.48827	0.296	0.437	1.16743e-285
Pdcl3	0	4.27093e-290	-0.721404	0.101	0.203	1.37887e-285
Chaf1a	0	4.45249e-290	-2.8519	0.003	0.048	1.43749e-285
Pmvk	0	1.39841e-289	-1.3088	0.029	0.096	4.51477e-285
4930469K13Rik	0	3.15422e-289	-1.3179	0.149	0.247	1.01834e-284
Adam19	0	3.266e-289	-1.33784	0.035	0.105	1.05443e-284
Gspt1	0	3.6888e-289	-0.523431	0.262	0.398	1.19093e-284
Ifi214	0	4.22393e-289	1.09055	0.15	0.072	1.3637e-284
E2f3	0	1.24494e-288	-1.09771	0.033	0.103	4.01929e-284
Hmgcr	0	2.14979e-288	-0.895692	0.112	0.212	6.94061e-284
Mrps11	0	2.44339e-288	-0.9122	0.048	0.127	7.88849e-284
Fasn	0	5.94848e-288	-0.996831	0.056	0.137	1.92047e-283
Rnft1	0	6.91966e-288	-0.900709	0.099	0.196	2.23401e-283
Dcaf5	0	7.88598e-288	0.991631	0.25	0.158	2.54599e-283
Sdccag8	0	8.54473e-288	1.34392	0.158	0.081	2.75867e-283
Gtf2h4	0	1.48424e-287	-1.19181	0.029	0.096	4.79186e-283
Eps15	0	3.22032e-287	0.881993	0.313	0.22	1.03968e-282
Xrcc4	0	3.50629e-287	1.06728	0.27	0.18	1.13201e-282
1110032F04Rik	0	3.86811e-287	-2.12792	0.011	0.064	1.24882e-282
Ufc1	0	4.03118e-287	-0.621123	0.134	0.246	1.30147e-282
Ctss	0	4.98175e-287	0.788157	0.274	0.174	1.60836e-282
Prrc2b	0	6.63068e-287	0.74689	0.345	0.244	2.14071e-282
Farsa	0	7.21274e-287	-0.79692	0.087	0.182	2.32863e-282
Zfp706	0	1.38064e-286	-0.508937	0.279	0.415	4.45739e-282
Zmiz1	0	2.15123e-286	1.02182	0.248	0.157	6.94525e-282
Thap3	0	2.59031e-286	1.18063	0.198	0.114	8.36282e-282
Paics	0	4.94308e-286	-0.666088	0.115	0.22	1.59587e-281
Crot	0	9.6097e-286	1.57207	0.105	0.042	3.10249e-281
Sap18	0	1.15849e-285	-0.583528	0.167	0.287	3.74019e-281
Rpl21	0	1.33148e-285	-0.136708	0.999	0.999	4.2987e-281
Chmp2a	0	1.95166e-285	-0.544988	0.259	0.394	6.30094e-281
1110065P20Rik	0	5.23381e-285	-1.28263	0.026	0.09	1.68973e-280
Mlf2	0	7.75167e-285	-0.795501	0.088	0.183	2.50263e-280
Eif3c	0	1.15514e-284	-0.475929	0.376	0.513	3.72936e-280
Ep300	0	3.59675e-284	0.93558	0.258	0.165	1.16121e-279
Psmc3ip	0	6.04625e-284	-1.8286	0.01	0.061	1.95203e-279
Tdrkh	0	6.7974e-284	-2.21866	0.012	0.064	2.19454e-279
Mars	0	7.41213e-284	-0.880235	0.055	0.135	2.39301e-279
Slc16a1	0	7.69659e-284	-0.952229	0.069	0.155	2.48484e-279
Diaph3	0	1.0577e-283	-1.39391	0.02	0.08	3.4148e-279
Hmbox1	0	3.76064e-283	1.08803	0.218	0.131	1.21412e-278
Tk1	0	4.8842e-283	-2.91876	0.004	0.048	1.57686e-278
Serf1	0	5.054e-283	-2.289	0.008	0.056	1.63168e-278
Ddb1	0	8.54884e-283	-0.604373	0.156	0.272	2.75999e-278
Surf2	0	9.94733e-283	-0.912605	0.066	0.151	3.2115e-278
Fbxl20	0	1.36456e-282	1.10767	0.197	0.113	4.40549e-278
Smim3	0	2.01338e-282	-4.19134	0.002	0.043	6.50019e-278
Naa10	0	2.94913e-282	-0.595119	0.137	0.25	9.52128e-278
Atxn7l1	0	5.06148e-282	0.908787	0.261	0.168	1.6341e-277
Btbd11	0	8.02294e-282	1.15136	0.195	0.111	2.59021e-277
Sla2	0	1.35848e-281	1.61086	0.093	0.034	4.38584e-277
Slc25a39	0	1.58041e-281	-1.12442	0.036	0.106	5.10235e-277
Ndufaf4	0	1.96863e-281	-0.78996	0.093	0.188	6.35573e-277
Gm44686	0	5.22038e-281	1.08574	0.19	0.106	1.6854e-276
Mrps16	0	1.56758e-280	-0.52428	0.215	0.344	5.06092e-276
Smc2	0	1.8213e-280	-0.833591	0.065	0.149	5.88006e-276
Sh3bp5	0	1.82225e-280	0.910672	0.234	0.142	5.88312e-276
Mapk6	0	2.10832e-280	-0.850178	0.14	0.244	6.80671e-276
Trappc9	0	6.60815e-280	1.00245	0.243	0.152	2.13344e-275
Mthfd2	0	4.20061e-279	-0.699369	0.109	0.21	1.35617e-274
Zmynd11	0	6.96381e-279	0.881257	0.3	0.207	2.24827e-274
Morc3	0	7.12184e-279	0.952795	0.277	0.186	2.29929e-274
Arf6	0	3.61546e-278	-0.717677	0.143	0.251	1.16725e-273
Ikbkb	0	5.24492e-278	0.751689	0.337	0.24	1.69332e-273
Limd2	0	1.61057e-277	0.283344	0.827	0.787	5.19974e-273
Gcc2	0	3.01051e-277	1.19065	0.212	0.128	9.71944e-273
Pxk	0	3.25016e-277	1.17606	0.183	0.102	1.04932e-272
Med8	0	1.15495e-276	-0.597611	0.125	0.233	3.72877e-272
Klhdc4	0	1.4466e-276	-1.05337	0.045	0.118	4.67034e-272
2810013P06Rik	0	1.48865e-276	1.31644	0.119	0.052	4.80609e-272
Fam117a	0	2.24384e-276	1.15622	0.171	0.091	7.24423e-272
Tob2	0	2.93118e-276	-1.04692	0.155	0.256	9.46332e-272
Ssna1	0	3.2181e-276	-0.666812	0.098	0.196	1.03897e-271
Ctso	0	4.30464e-276	1.5839	0.089	0.032	1.38975e-271
Mrpl38	0	4.60661e-276	-0.728599	0.088	0.182	1.48724e-271
Psmc1	0	1.01602e-275	-0.676039	0.102	0.201	3.28023e-271
Faf1	0	1.02419e-275	0.753591	0.383	0.294	3.30659e-271
Cldnd1	0	1.6975e-275	-1.07788	0.052	0.129	5.48038e-271
Nup98	0	2.41583e-275	-0.672676	0.29	0.413	7.79951e-271
Rftn1	0	2.52701e-275	0.821171	0.355	0.267	8.15847e-271
Ndufb1-ps	0	3.13577e-275	-0.508447	0.287	0.419	1.01238e-270
Ypel3	0	4.1834e-275	0.594041	0.37	0.261	1.35061e-270
Tmem241	0	5.01126e-275	1.48723	0.114	0.049	1.61788e-270
Lonp2	0	6.21963e-275	0.684646	0.398	0.305	2.00801e-270
Chek1	0	6.37025e-275	-3.10278	0.003	0.044	2.05664e-270
Pole	0	8.755e-275	-2.23423	0.006	0.051	2.82655e-270
Cenpk	0	4.94717e-274	-1.79898	0.009	0.058	1.59719e-269
Ube2c	0	5.45515e-274	-6.61207	0	0.038	1.76119e-269
Nenf	0	7.09128e-274	-1.25075	0.024	0.085	2.28942e-269
Myo18a	0	1.0845e-273	1.82535	0.084	0.03	3.50132e-269
Ndufs2	0	3.05818e-273	-0.537949	0.188	0.311	9.87335e-269
Acvr2a	0	3.84904e-273	-1.2727	0.05	0.124	1.24266e-268
Ifngr1	0	2.14522e-272	0.690977	0.249	0.15	6.92585e-268
Dync1h1	0	2.58071e-272	0.91628	0.266	0.175	8.33182e-268
Mrpl19	0	2.88392e-272	-0.737865	0.077	0.165	9.31074e-268
Hikeshi	0	1.94879e-271	-0.681841	0.087	0.18	6.29166e-267
Galnt11	0	2.87915e-271	1.246	0.165	0.089	9.29533e-267
Pnisr	0	3.33657e-271	0.735716	0.373	0.282	1.07721e-266
Ppp2r1b	0	4.20021e-271	-0.840169	0.098	0.192	1.35604e-266
Fgd3	0	7.42932e-271	1.07996	0.18	0.099	2.39856e-266
Tmem156	0	7.9116e-271	1.61211	0.111	0.048	2.55426e-266
Tmem33	0	7.9781e-271	-0.724162	0.094	0.188	2.57573e-266
Timm22	0	8.4089e-271	-0.837056	0.057	0.136	2.71481e-266
Atxn7	0	1.13422e-270	0.821702	0.283	0.188	3.66184e-266
Rgs14	0	1.68788e-270	1.34063	0.106	0.043	5.44934e-266
Chn2	0	3.86789e-270	1.48293	0.145	0.073	1.24875e-265
Ddx6	0	5.8174e-270	0.44502	0.571	0.494	1.87815e-265
Aamp	0	6.86686e-270	-0.631006	0.151	0.262	2.21697e-265
Clybl	0	7.43367e-270	1.57633	0.112	0.049	2.39996e-265
Pus7	0	8.12022e-270	-0.950633	0.054	0.131	2.62161e-265
[truncated: 72,610 more rows]
