# Supplementary material for: InTraSeq: A Multimodal Assay that Uncovers New Single-Cell Biology and Regulatory Mechanisms
Source: Research Square preprint supplement (doi:10.21203/rs.3.rs-5284652/v1), 2024-12-09
Supplement: Supplementary file 6 [file b5fa61c5a00a7bf217931497.xlsx]

## Sheet: PBMC
cat#	Antibody_full_name	Antibody_short_name	Protein_short_name	Product_species_cross_reactivity	Is_PTM	Representative_gene	Isotype	Type
8173	Acetyl-Histone H3 (Lys27) (D5E4) XP® Rabbit mAb (Oligo Conjugate OC409CX)	Acetyl-Histone-H3(Lys27)-Ab	H3K27Ac	H M R Mk (Hm) (X) (Z) (Hr) (GP) (Rab)	Yes	HIST1H3D	Rabbit	Intracellular
15103	Aiolos (D1C1E) Rabbit mAb #15103 (Oligo conjugate OC416CX)	Aiolos-Ab	Aiolos	H M	No	IKZF3	Rabbit	Intracellular
4691	Akt (pan) (C67E7) Rabbit mAb (Oligo Conjugate OC406CX)	Akt(pan)-Ab	Akt	H M R Mk Dm (Pg)	No	AKT1	Rabbit	Intracellular
90176	CD19 (Intracellular Domain) (D4V4B) XP® Rabbit mAb (Oligo Conjugate OC267CX)	CD19(Intracellular-Domain)-Ab	CD19	H M Mk (B)	No	CD19	Rabbit	Surface
64233	CD3 (UCHT1) Mouse mAb (Oligo Conjugate OC418CX)	CD3(UCHT1)-Ab	CD3	H	No	CD3E	Rabbit	Surface
81544	CD4 (RPA-T4) Mouse mAb (Oligo Conjugate OC419CX)	CD4(RPA-T4)-Ab	CD4	H	No	CD4	Rabbit	Surface
76437	CD68 (D4B9C) XP® Rabbit mAb (Oligo Conjugate OC275CX)	CD68-Ab	CD68	H Mk	No	CD68	Mouse	Surface
64521	CD8α (SK1) Mouse mAb (Oligo Conjugate OC420CX)	CD8(SK1)-Ab	CD8	H	No	CD8A	Mouse	Surface
9197	CREB (48H2) Rabbit mAb (Oligo Conjugate OC253CX)	CREB-Ab	CREB-1	H M R Mk Dm	No	CREB1	Rabbit	Intracellular
2880	FoxO1 (C29H4) Rabbit mAb #2880	FoxO1-Ab	FOXO1	H M R Mk	No	FOXO1	Rabbit	Intracellular
2118	GAPDH (14C10) Rabbit mAb (Oligo Conjugate OC251CX)	GAPDH-Ab	GAPDH	H M R Mk B Pg (Pg)	No	GAPDH	Rabbit	Intracellular
12041	Glucocorticoid Receptor (D6H2L) XP® Rabbit mAb	Glucocorticoid-Receptor-Ab	GR	H M R Mk	No	NR3C1	Rabbit	Intracellular
4499	Histone H3 (D1H2) XP® Rabbit mAb (Oligo Conjugate OC407CX)	Histone-H3-Ab	Histone H3	H M R Mk (Hm) (C) (Dm) (X) (Z) (B)	No	HIST1H3D	Rabbit	Intracellular
17198	Iba1/AIF-1 (E4O4W) XP® Rabbit mAb (Oligo Conjugate OC236CX)	Iba1-AIF-1-Ab	AIF-1	H M R	No	AIF1	Rabbit	Intracellular
14859	Ikaros (D6N9Y) Rabbit mAb #14859 (Oligo Conjugate OC415CX)	Ikaros-Ab	Ikaros	H M	No	IKZF1	Rabbit	Intracellular
99746	NCAM1 (CD56) (E7X9M) XP® Rabbit mAb (Oligo Conjugate OC414CX)	NCAM1-Ab	NCAM1	H M R Mk	No	NCAM1	Rabbit	Surface
8242	NF-κB p65 (D14E12) XP ® Rabbit mAb	NF-kB-p65-Ab	NF-κB	H M R Hm Mk Dg	No	RELA	Rabbit	Intracellular
5861	NFAT1 (D43B1) XP ® Rabbit mAb	NFAT1-Ab	NFAT1	H M	No	NFATC2	Rabbit	Intracellular
4695	p44/42 MAPK (Erk1/2) (137F5) Rabbit mAb (Oligo Conjugate OC404CX)	p44-42-MAPK-(Erk1-2) -Ab	MAPK-ERK1/2	H M R Hm Mk Mi Dm Z B Dg Pg Ce (C)	No	MAPK3	Rabbit	Intracellular
2855	Phospho-4E-BP1 (Thr37/46) (236B4) Rabbit mAb (Oligo Conjugate OC410CX)	Phospho-4E-BP1(Thr37/46) -Ab	p-4E-BP1-Thr37/46	H M R Mk Dm	Yes	EIF4EBP1	Rabbit	Intracellular
4060	Phospho-Akt (Ser473) (D9E) XP® Rabbit mAb (Oligo Conjugate OC402CX)	Phospho-Akt-(Ser473)-Ab	p-Akt-Ser473	H M R Hm Mk Dm Z B (C) (X) (Dg) (Pg)	Yes	AKT1	Rabbit	Intracellular
9198	Phospho-CREB (Ser133) (87G3) Rabbit mAb (Oligo Conjugate OC250CX)	Phospho-CREB(Ser133)-Ab	p-CREB-1-Ser133	H M R (Z)	Yes	CREB1	Mouse	Intracellular
97285	Phospho-Glucocorticoid Receptor (Ser226) (D9D3V) Rabbit mAb	Phospho-Glucocorticoid-Receptor(Ser226)-Ab	p-GR-Ser226	H M	Yes	NR3C1	Rabbit	Intracellular
3377	Phospho-Histone H3 (Ser10) (D2C8) XP® Rabbit mAb (Oligo Conjugate OC413CX)	Phospho-Histone H3-(Ser10)-Ab	p-H3-Ser10	H M R Mk Z	Yes	HIST1H3D	Rabbit	Intracellular
3033	Phospho-NF-κB p65 (Ser536) (93H1) Rabbit mAb	Phospho-NF-p65(Ser536)-Ab	p-NF-κB-Ser536	H M R Hm Mk Pg (Dg)	Yes	RELA	Rabbit	Intracellular
4377	Phospho-p44/42 MAPK (Erk1/2) (Thr202/Tyr204) (197G2) Rabbit mAb (Oligo Conjugate OC412CX)	Phospho-p44-42-MAPK-Erk1-2(Thr202-Tyr204) -Ab	p-MAPK-ERK1/2-Thr202/Tyr204	H M R Mk Mi Dm Z Pg	Yes	MAPK3	Rabbit	Intracellular
4858	Phospho-S6 Ribosomal Protein (Ser235/236) (D57.2.2E) XP® Rabbit mAb (Oligo Conjugate OC408CX)	Phospho-S6(Ser235-236) -Ab	p-S6-Ser235/236	H M R Mk Mi Sc (C) (Pg)	Yes	RPS6	Rabbit	Intracellular
8826	Phospho-Stat1 (Ser727) (D3B7) Rabbit mAb	Phospho-Stat1(Ser727)-Ab	p-STAT1-Ser727	H M R Mk (B)	Yes	STAT1	Rabbit	Intracellular
34911	Phospho-Stat3 (Ser727) (D4X3C) Rabbit mAb	Phospho-Stat3-(Tyr705)-Ab	p-STAT3-Ser727	H (M) (R)	Yes	STAT3	Rabbit	Intracellular
9145	Phospho-Stat3 (Tyr705) (D3A7) XP® Rabbit mAb (Oligo Conjugate OC403CX)	Phospho-Stat3(Ser727-Ab	p-STAT3-Tyr705	H M R Mk (Hm) (B) (Pg) (Hr) (Rab)	Yes	STAT3	Rabbit	Intracellular
72590	S100A9 (D5O6O) Rabbit mAb (Oligo Conjugate OC237CX)	S100A9-Ab	S100A9	H	No	S100A9	Rabbit	Intracellular
2317	S6 Ribosomal Protein (54D2) Mouse mAb (Oligo Conjugate OC240CX)	S6-Ab	S6	H M R Mk Dm	No	RPS6	Rabbit	Intracellular
14994	Stat1 (D1K9Y) Rabbit mAb	Stat1-Ab	STAT1	H M R Mk	No	STAT1	Rabbit	Intracellular
13232	T-bet/TBX21 (D6N8B) XP® Rabbit mAb (Oligo Conjugate OC254CX)	T-bet-TBX21-Ab	TBX21	H	No	TBX21	Rabbit	Intracellular
2203	TCF1/TCF7 (C63D9) Rabbit mAb (Oligo Conjugate OC307CX)	TCF1-TCF7-Ab	TCF-7	H M	No	TCF7	Mouse	Intracellular
9733	Tri-Methyl-Histone H3 (Lys27) (C36B11) Rabbit mAb (Oligo Conjugate OC405CX)	Tri-Methyl-Histone H3-(Lys27)-Ab	H3K27me3	H M R Mk (X) (Z)	Yes	HIST1H3D	Rabbit	Intracellular
5741	Vimentin (D21H3) XP® Rabbit mAb (Oligo Conjugate OC273CX)	Vimentin-Ab	Vimentin	H M R Mk	No	VIM	Rabbit	Intracellular

## Sheet: Th17
cat#	Antibody_full_name	Antibody_short_name	Protein_short_name	Product_species_cross_reactivity	Is_PTM	Representative_gene	Isotype	Type
8173	Acetyl-Histone H3 (Lys27) (D5E4) XP® Rabbit mAb (Oligo Conjugate OC409CX)	Acetyl-Histone-H3(Lys27)	H3K27Ac	H M R Mk (Hm) (X) (Z) (Hr) (GP) (Rab)	Yes	Hist1h3d	Rabbit	Intracellular
15103	Aiolos (D1C1E) Rabbit mAb #15103 (Oligo conjugate OC416CX)	Aiolos	Aiolos	H M	No	Ikzf3	Rabbit	Intracellular
4691	Akt (pan) (C67E7) Rabbit mAb (Oligo Conjugate OC406CX)	Akt(pan)	Akt	H M R Mk Dm (Pg)	No	Akt1	Rabbit	Intracellular
8638	BATF (D7C5) Rabbit mAb	BATF	BATF	H M	No	Batf	Rabbit	Intracellular
4351	CHD1 (D8C2) Rabbit mAb #4351	CHD1	CHD-1	H M R Mk (B) (Dg) (Pg)	No	Chd1	Rabbit	Intracellular
9197	CREB (48H2) Rabbit mAb (Oligo Conjugate OC253CX)	CREB	CREB-1	H M R Mk Dm	No	Creb1	Rabbit	Intracellular
2880	FoxO1 (C29H4) Rabbit mAb #2880	FoxO1	FOXO1	H M R Mk	No	Foxo1	Rabbit	Intracellular
2118	GAPDH (14C10) Rabbit mAb (Oligo Conjugate OC251CX)	GAPDH	GAPDH	H M R Mk B Pg (Pg)	No	Gapdh	Rabbit	Intracellular
12041	Glucocorticoid Receptor (D6H2L) XP® Rabbit mAb	Glucocorticoid-Receptor	GR	H M R Mk	No	Nr3c1	Rabbit	Intracellular
4499	Histone H3 (D1H2) XP® Rabbit mAb (Oligo Conjugate OC407CX)	Histone-H3	Histone H3	H M R Mk (Hm) (C) (Dm) (X) (Z) (B)	No	Hist1h3d	Rabbit	Intracellular
14859	Ikaros (D6N9Y) Rabbit mAb #14859 (Oligo Conjugate OC415CX)	Ikaros	Ikaros	H M	No	Ikzf1	Rabbit	Intracellular
8242	NF-κB p65 (D14E12) XP ® Rabbit mAb	NF-kB-p65	NF-κB	H M R Hm Mk Dg	No	Rela	Rabbit	Intracellular
5861	NFAT1 (D43B1) XP ® Rabbit mAb	NFAT1	NFAT1	H M	No	Nfatc2	Rabbit	Intracellular
4695	p44/42 MAPK (Erk1/2) (137F5) Rabbit mAb (Oligo Conjugate OC404CX)	p44-42-MAPK-(Erk1-2)	MAPK-ERK1/2	H M R Hm Mk Mi Dm Z B Dg Pg Ce (C)	No	Mapk3	Rabbit	Intracellular
2855	Phospho-4E-BP1 (Thr37/46) (236B4) Rabbit mAb (Oligo Conjugate OC410CX)	Phospho-4E-BP1(Thr37/46)	p-4E-BP1-Thr37/46	H M R Mk Dm	Yes	Eif4ebp1	Rabbit	Intracellular
4060	Phospho-Akt (Ser473) (D9E) XP® Rabbit mAb (Oligo Conjugate OC402CX)	Phospho-Akt-(Ser473)	p-Akt-Ser473	H M R Hm Mk Dm Z B (C) (X) (Dg) (Pg)	Yes	Akt1	Rabbit	Intracellular
3270	Phospho-c-Jun (Ser73) (D47G9) XP ® Rabbit mAb	Phospho-c-Jun(Ser73)	p-Jun-Ser73	H M R Mk Pg (B)	Yes	Jun	Rabbit	Intracellular
9198	Phospho-CREB (Ser133) (87G3) Rabbit mAb (Oligo Conjugate OC250CX)	Phospho-CREB(Ser133)	p-CREB-1-Ser133	H M R (Z)	Yes	Creb1	Rabbit	Intracellular
97285	Phospho-Glucocorticoid Receptor (Ser226) (D9D3V) Rabbit mAb	Phospho-Glucocorticoid-Receptor(Ser226)	p-GR-Ser226	H M	Yes	Nr3c1	Rabbit	Intracellular
3377	Phospho-Histone H3 (Ser10) (D2C8) XP® Rabbit mAb (Oligo Conjugate OC413CX)	Phospho-Histone H3-(Ser10)	p-H3-Ser10	H M R Mk Z	Yes	Hist1h3d	Rabbit	Intracellular
3033	Phospho-NF-κB p65 (Ser536) (93H1) Rabbit mAb	Phospho-NF-p65(Ser536)	p-NF-κB-Ser536	H M R Hm Mk Pg (Dg)	Yes	Rela	Rabbit	Intracellular
4377	Phospho-p44/42 MAPK (Erk1/2) (Thr202/Tyr204) (197G2) Rabbit mAb (Oligo Conjugate OC412CX)	Phospho-p44-42-MAPK-Erk1-2(Thr202-Tyr204)	p-MAPK-ERK1/2-Thr202/Tyr204	H M R Mk Mi Dm Z Pg	Yes	Mapk3	Rabbit	Intracellular
4858	Phospho-S6 Ribosomal Protein (Ser235/236) (D57.2.2E) XP® Rabbit mAb (Oligo Conjugate OC408CX)	Phospho-S6(Ser235-236)	p-S6-Ser235/236	H M R Mk Mi Sc (C) (Pg)	Yes	Rps6	Rabbit	Intracellular
8826	Phospho-Stat1 (Ser727) (D3B7) Rabbit mAb	Phospho-Stat1(Ser727)	p-STAT1-Ser727	H M R Mk (B)	Yes	Stat1	Rabbit	Intracellular
34911	Phospho-Stat3 (Ser727) (D4X3C) Rabbit mAb	Phospho-Stat3(Ser727	p-STAT3-Ser727	H (M) (R)	Yes	Stat3	Rabbit	Intracellular
9145	Phospho-Stat3 (Tyr705) (D3A7) XP® Rabbit mAb (Oligo Conjugate OC403CX)	Phospho-Stat3-(Tyr705)	p-STAT3-Tyr705	H M R Mk (Hm) (B) (Pg) (Hr) (Rab)	Yes	Stat3	Rabbit	Intracellular
2317	S6 Ribosomal Protein (54D2) Mouse mAb (Oligo Conjugate OC240CX)	S6	S6	H M R Mk Dm	No	Rps6	Mouse	Intracellular
14994	Stat1 (D1K9Y) Rabbit mAb	Stat1	STAT1	H M R Mk	No	Stat1	Rabbit	Intracellular
2203	TCF1/TCF7 (C63D9) Rabbit mAb (Oligo Conjugate OC307CX)	TCF1-TCF7	TCF-7	H M	No	Tcf7	Rabbit	Intracellular
9733	Tri-Methyl-Histone H3 (Lys27) (C36B11) Rabbit mAb (Oligo Conjugate OC405CX)	Tri-Methyl-Histone H3-(Lys27)	H3K27me3	H M R Mk (X) (Z)	Yes	Hist1h3d	Rabbit	Intracellular
5741	Vimentin (D21H3) XP® Rabbit mAb (Oligo Conjugate OC273CX)	Vimentin	Vimentin	H M R Mk	No	Vim	Rabbit	Intracellular
