# Supplementary material for: InTraSeq: A Multimodal Assay that Uncovers New Single-Cell Biology and Regulatory Mechanisms
Source: Research Square preprint supplement (doi:10.21203/rs.3.rs-5284652/v1), 2024-12-09
Supplement: Supplementary file 7 [file dc0b0b6c401b0b11dcae8159.xlsx]

## Sheet: Sheet 1
cluster	gene	p_val	avg_log2FC	pct.1	pct.2	p_val_adj
B cell	BANK1	0	8.38088	0.947	0.016	0
B cell	MS4A1	0	7.6994	0.896	0.016	0
B cell	IGHM	0	8.22217	0.87	0.014	0
B cell	AFF3	0	6.38097	0.896	0.045	0
B cell	IGKC	0	7.93197	0.914	0.063	0
B cell	RALGPS2	0	6.15273	0.892	0.049	0
B cell	CCSER1	0	7.60662	0.86	0.02	0
B cell	ARHGAP24	0	8.2261	0.815	0.01	0
B cell	MEF2C	0	7.18758	0.76	0.019	0
B cell	CD79A	0	7.79847	0.748	0.009	0
B cell	HLA-DRA	0	2.52752	0.991	0.255	0
B cell	HLA-DRB1	0	2.28076	0.988	0.28	0
B cell	IL32	0	-4.34022	0.128	0.812	0
B cell	HLA-DPA1	0	2.39562	0.945	0.266	0
B cell	EBF1	0	8.19967	0.68	0.006	0
B cell	HLA-DQA1	0	3.7126	0.773	0.102	0
B cell	CD247	0	-4.23221	0.064	0.708	0
B cell	HLA-DPB1	0	2.4177	0.986	0.352	0
B cell	PAX5	0	8.60436	0.637	0.004	0
B cell	CD96	0	-3.95135	0.079	0.685	0
B cell	GIMAP7	0	-3.94885	0.073	0.661	0
B cell	BCL11A	0	6.62506	0.6	0.015	0
B cell	PLEKHG1	0	4.87058	0.624	0.039	0
B cell	HLA-DQB1	0	3.69664	0.665	0.095	0
B cell	WDFY4	0	5.28238	0.612	0.042	0
B cell	BASP1	0	4.49805	0.609	0.05	0
B cell	STRBP	0	3.43588	0.68	0.127	0
B cell	TCL1A	0	7.5608	0.557	0.009	0
B cell	CD2	0	-4.05393	0.059	0.607	0
B cell	CD79B	0	4.84073	0.587	0.046	0
B cell	GNG7	0	5.74493	0.561	0.022	0
B cell	PRKCH	0	-3.74113	0.073	0.61	0
B cell	FYB1	0	-4.13654	0.051	0.581	0
B cell	HCST	0	-3.61564	0.086	0.613	0
B cell	SETBP1	0	2.9357	0.667	0.14	0
B cell	KHDRBS2	0	8.26464	0.524	0.005	0
B cell	S100A10	0	-2.64269	0.192	0.709	0
B cell	CD3D	0	-3.50351	0.09	0.606	0
B cell	SWAP70	0	4.2831	0.568	0.068	0
B cell	BCL11B	0	-4.07713	0.052	0.551	0
B cell	DENND5B	0	7.23063	0.506	0.008	0
B cell	BLNK	0	5.712	0.524	0.027	0
B cell	ADAM28	0	4.94825	0.538	0.044	0
B cell	HDAC9	0	4.8913	0.524	0.03	0
B cell	PITPNC1	0	-3.34852	0.086	0.579	0
B cell	CD74	0	2.4235	0.979	0.487	0
B cell	FCRL1	0	8.72266	0.48	0.003	0
B cell	PALM2-AKAP2	0	3.02861	0.676	0.207	0
B cell	AAK1	0	-3.37938	0.066	0.535	0
B cell	AC083837.1	0	3.97958	0.538	0.07	0
B cell	CDK14	0	3.57025	0.538	0.076	0
B cell	CD37	0	2.56445	0.856	0.395	0
B cell	TCF4	0	4.32061	0.506	0.05	0
B cell	HVCN1	0	4.40165	0.514	0.059	0
B cell	LYN	0	2.44943	0.629	0.179	0
B cell	STX7	0	3.16922	0.591	0.146	0
B cell	HLA-DMA	0	2.26903	0.615	0.17	0
B cell	EAF2	0	4.66553	0.49	0.048	0
B cell	FCHSD2	0	2.58201	0.896	0.455	0
B cell	CD83	0	2.99674	0.604	0.171	0
B cell	NIBAN3	0	7.82506	0.427	0.004	0
B cell	IGHD	0	8.82937	0.425	0.002	0
B cell	SMC6	0	2.65905	0.598	0.182	0
B cell	PRKCE	0	2.75817	0.606	0.191	0
B cell	SIPA1L3	0	2.86382	0.553	0.143	0
B cell	ZCCHC7	0	2.36942	0.859	0.451	0
B cell	BLK	0	7.07651	0.411	0.005	0
B cell	AP002075.1	0	7.80872	0.408	0.004	0
B cell	TPD52	0	2.73978	0.553	0.15	0
B cell	AC120193.1	0	3.82157	0.464	0.064	0
B cell	PLCG2	0	1.98222	0.809	0.41	0
B cell	OSBPL10	0	7.11485	0.4	0.006	0
B cell	ID3	0	3.39182	0.472	0.082	0
B cell	UBE2E2	0	1.7758	0.564	0.174	0
B cell	SIPA1L1	0	2.37979	0.747	0.358	0
B cell	LY86	0	5.21644	0.409	0.026	0
B cell	USP6NL	0	3.18317	0.472	0.091	0
B cell	HLA-DMB	0	2.69791	0.489	0.108	0
B cell	LARGE1	0	5.05747	0.398	0.023	0
B cell	SNX2	0	2.36714	0.588	0.214	0
B cell	SMIM14	0	3.45307	0.441	0.071	0
B cell	S100A6	0	-1.76052	0.532	0.902	0
B cell	LINC02397	0	7.91822	0.367	0.003	0
B cell	SNX29	0	2.42964	0.544	0.187	0
B cell	COL19A1	0	7.46123	0.358	0.004	0
B cell	PTK2	0	3.02802	0.419	0.074	0
B cell	COBLL1	0	7.61737	0.347	0.003	0
B cell	LINC00926	0	6.39837	0.35	0.008	0
B cell	PIK3AP1	0	2.26518	0.503	0.163	0
B cell	SYK	0	2.8554	0.441	0.102	0
B cell	RUBCNL	0	7.84308	0.341	0.003	0
B cell	ALOX5	0	3.81618	0.383	0.053	0
B cell	ANGPTL1	0	6.12042	0.329	0.008	0
B cell	CIITA	0	2.9755	0.411	0.09	0
B cell	POU2F2	0	2.51133	0.435	0.117	0
B cell	TNFRSF13C	0	6.43378	0.322	0.006	0
B cell	MTSS1	0	3.51204	0.358	0.052	0
B cell	MICAL3	0	2.68623	0.409	0.108	0
B cell	RABEP2	0	3.23155	0.36	0.062	0
B cell	SAMD4A	0	2.65942	0.386	0.092	0
B cell	PAWR	0	4.83124	0.313	0.019	0
B cell	CD22	0	7.24473	0.297	0.005	0
B cell	MARCH1	0	3.36658	0.361	0.07	0
B cell	IRF8	0	3.03983	0.368	0.079	0
B cell	RAB30	0	3.1104	0.341	0.053	0
B cell	IL7	0	2.98219	0.351	0.064	0
B cell	LYL1	0	4.24401	0.308	0.031	0
B cell	PDLIM1	0	3.44699	0.321	0.046	0
B cell	STAP1	0	3.83698	0.313	0.04	0
B cell	MACROD2	0	6.51081	0.277	0.005	0
B cell	L3MBTL4	0	3.09498	0.334	0.064	0
B cell	CPED1	0	5.01514	0.28	0.018	0
B cell	CCDC50	0	2.79229	0.343	0.081	0
B cell	CD72	0	4.86034	0.279	0.018	0
B cell	PKIG	0	5.11328	0.272	0.012	0
B cell	PARP14	0	1.49634	0.892	0.632	0
B cell	LRMP	0	3.04446	0.311	0.061	0
B cell	SPIB	0	6.86569	0.246	0.003	0
B cell	TLR10	0	8.31402	0.243	0.001	0
B cell	CD40	0	2.29305	0.329	0.089	0
B cell	STEAP1B	0	5.72702	0.252	0.012	0
B cell	FGD2	0	3.67022	0.273	0.039	0
B cell	PCDH9	0	6.38185	0.238	0.005	0
B cell	RHEX	0	5.8232	0.237	0.005	0
B cell	CLEC17A	0	8.70228	0.23	0.001	0
B cell	SLC9A7	0	4.39397	0.245	0.021	0
B cell	CHPT1	0	3.03106	0.279	0.056	0
B cell	KMO	0	3.17961	0.272	0.053	0
B cell	CCR6	0	3.33709	0.245	0.033	0
B cell	LRRK2	0	2.93309	0.263	0.052	0
B cell	TBC1D9	0	3.81998	0.237	0.031	0
B cell	FAM30A	0	6.92395	0.208	0.003	0
B cell	MEF2C-AS1	0	6.9788	0.208	0.003	0
B cell	MZB1	0	4.61886	0.217	0.014	0
B cell	ABCB4	0	6.88863	0.199	0.003	0
B cell	CNR2	0	3.82771	0.213	0.023	0
B cell	IGLC3	0	8.26111	0.193	0.006	0
B cell	LINC02422	0	3.74893	0.21	0.023	0
B cell	IGLC2	0	8.08955	0.189	0.006	0
B cell	FCRLA	0	8.06871	0.18	0.001	0
B cell	DMD	0	5.31151	0.184	0.007	0
B cell	LINC01857	0	4.61816	0.191	0.016	0
B cell	POU2AF1	0	7.62853	0.171	0.001	0
B cell	VPREB3	0	6.86666	0.172	0.002	0
B cell	ST6GALNAC3	0	4.37625	0.185	0.016	0
B cell	UGT8	0	6.76304	0.168	0.002	0
B cell	PIP5K1B	0	5.57509	0.17	0.006	0
B cell	BTK	0	3.59979	0.192	0.03	0
B cell	E2F5	0	3.87684	0.18	0.018	0
B cell	MEF2C-AS2	0	7.14025	0.16	0.002	0
B cell	FCRL2	0	8.07357	0.158	0.001	0
B cell	LRRK1	0	3.88442	0.18	0.023	0
B cell	TLR7	0	6.37511	0.153	0.003	0
B cell	TNFRSF13B	0	7.40925	0.15	0.001	0
B cell	JCHAIN	0	5.6509	0.145	0.003	0
B cell	TSPAN33	0	4.33362	0.154	0.012	0
B cell	CD19	0	7.79932	0.143	0.001	0
B cell	HHEX	0	5.10123	0.148	0.007	0
B cell	HLA-DOB	0	5.13951	0.144	0.006	0
B cell	ZNF532	0	4.31021	0.145	0.012	0
B cell	AP001636.3	0	7.86918	0.133	0.001	0
B cell	GAPT	0	5.93908	0.136	0.005	0
B cell	TSPAN13	0	5.62716	0.133	0.004	0
B cell	SLC15A2	0	4.66883	0.131	0.009	0
B cell	CD24	0	7.04332	0.123	0.001	0
B cell	COL9A3	0	7.68029	0.119	0.001	0
B cell	TSBP1-AS1	0	5.09211	0.116	0.005	0
B cell	C16orf74	0	4.91717	0.116	0.006	0
B cell	FCER2	0	6.01593	0.109	0.004	0
B cell	AC060234.3	0	5.54186	0.106	0.005	0
B cell	AL079338.1	0	7.65248	0.097	0.001	0
B cell	KLHL14	0	8.53414	0.094	0	0
B cell	CD180	0	6.33068	0.082	0.002	0
B cell	PRICKLE1	0	6.08227	0.08	0.001	0
B cell	SLC38A11	0	10.6247	0.071	0	0
B cell	TMSB4X	0	-1.08522	0.999	1	0
B cell	B2M	0	-0.572623	1	1	0
B cell	ZNF860	2.85607e-306	8.70835	0.068	0	1.04535e-301
B cell	IQGAP2	1.13494e-305	-3.10084	0.091	0.581	4.15398e-301
B cell	PHACTR1	1.12508e-302	3.37107	0.22	0.036	4.1179e-298
B cell	LCP2	6.72196e-302	-3.59121	0.059	0.525	2.4603e-297
B cell	PDE3B	4.16938e-301	-2.8352	0.154	0.648	1.52603e-296
B cell	LARGE2	8.46554e-301	6.18028	0.074	0.001	3.09847e-296
B cell	GRK3	4.04696e-300	2.83899	0.283	0.065	1.48123e-295
B cell	IGLC1	4.34143e-299	8.70508	0.104	0.002	1.58901e-294
B cell	CALM1	3.2191e-298	-1.46656	0.597	0.897	1.17822e-293
B cell	WARS	4.05606e-296	1.41961	0.762	0.359	1.48456e-291
B cell	P2RX1	3.59991e-295	5.60471	0.093	0.004	1.3176e-290
B cell	LAT2	7.80528e-294	2.36029	0.398	0.123	2.85681e-289
B cell	BCAR3	3.56196e-293	3.98936	0.197	0.024	1.30371e-288
B cell	GLYATL1	1.30792e-292	7.49676	0.069	0.001	4.78712e-288
B cell	NCF1	1.04718e-291	1.14034	0.483	0.162	3.83277e-287
B cell	ATXN1	1.07322e-291	-2.47797	0.153	0.632	3.9281e-287
B cell	FCRL5	1.07164e-290	7.7389	0.074	0	3.92229e-286
B cell	PRKCQ	2.63313e-290	-3.82896	0.049	0.499	9.63752e-286
B cell	ADAM19	7.90502e-287	1.92445	0.474	0.162	2.89332e-282
B cell	ATP8B1	3.00941e-286	2.05828	0.542	0.206	1.10148e-281
B cell	CACNA1A	3.92098e-283	3.62976	0.144	0.017	1.43512e-278
B cell	PNOC	4.21395e-283	5.95828	0.079	0.001	1.54235e-278
B cell	LY86-AS1	3.30044e-281	5.19276	0.103	0.005	1.20799e-276
B cell	AL139020.1	4.72953e-280	8.22067	0.058	0	1.73105e-275
B cell	IL7R	6.50148e-280	-3.99869	0.061	0.534	2.37961e-275
B cell	ANXA1	1.4518e-278	-4.7235	0.027	0.471	5.31375e-274
B cell	AC019197.1	8.77152e-278	7.17977	0.06	0.001	3.21047e-273
B cell	GIMAP4	3.9897e-276	-4.24445	0.044	0.491	1.46027e-271
B cell	CAMK4	7.37775e-274	-3.51978	0.08	0.537	2.70033e-269
B cell	SLAMF1	1.35944e-273	2.46849	0.398	0.118	4.9757e-269
B cell	MT2A	9.34719e-273	-2.157	0.323	0.744	3.42116e-268
B cell	FCRL3	1.57808e-270	3.01532	0.201	0.029	5.77594e-266
B cell	CCL5	9.00805e-269	-4.49629	0.082	0.554	3.29704e-264
B cell	ZNF608	2.4452e-268	6.59198	0.072	0.001	8.94966e-264
B cell	RORA	1.86224e-265	-3.26893	0.078	0.518	6.81599e-261
B cell	NCOA3	1.89517e-264	1.51612	0.799	0.504	6.93651e-260
B cell	BTLA	5.51217e-260	3.42884	0.151	0.019	2.01751e-255
B cell	VIM	6.70232e-259	-1.32974	0.772	0.921	2.45312e-254
B cell	AUTS2	4.12547e-258	1.66291	0.68	0.326	1.50996e-253
B cell	TNFRSF17	6.37047e-257	6.22644	0.065	0.001	2.33166e-252
B cell	S100A4	1.62277e-255	-2.37325	0.268	0.702	5.93949e-251
B cell	GCNT2	8.69158e-255	2.78254	0.266	0.063	3.18121e-250
B cell	ORAI2	1.61553e-253	2.14365	0.469	0.18	5.91298e-249
B cell	AL592429.2	4.10083e-253	4.03972	0.125	0.011	1.50094e-248
B cell	HLA-DOA	5.55015e-253	3.74064	0.156	0.021	2.03141e-248
B cell	AC009522.1	4.32648e-250	4.47693	0.089	0.005	1.58353e-245
B cell	PARP15	5.39947e-248	2.11351	0.44	0.153	1.97626e-243
B cell	RERE	2.26074e-247	1.79308	0.659	0.345	8.27455e-243
B cell	ATP10D	3.84329e-247	2.6952	0.264	0.066	1.40668e-242
B cell	AC103831.1	1.54457e-245	9.68068	0.049	0	5.65329e-241
B cell	MOXD1	4.18207e-244	6.98727	0.055	0.001	1.53068e-239
B cell	MEF2A	3.4502e-243	1.85142	0.597	0.291	1.26281e-238
B cell	AL161781.2	7.43696e-243	8.93835	0.045	0	2.722e-238
B cell	MARCH3	8.75112e-242	2.10739	0.432	0.153	3.203e-237
B cell	ITK	7.63398e-240	-3.9166	0.044	0.441	2.79411e-235
B cell	BACH2	6.34273e-239	1.4592	0.828	0.492	2.3215e-234
B cell	BMP2K	1.81487e-238	2.31178	0.375	0.125	6.64261e-234
B cell	S100A11	8.109e-238	-1.81258	0.443	0.784	2.96798e-233
B cell	VRK2	4.49259e-237	1.74532	0.595	0.283	1.64433e-232
B cell	PFN1	2.8789e-236	-1.27266	0.703	0.901	1.0537e-231
B cell	RCSD1	3.01643e-234	1.78963	0.663	0.375	1.10404e-229
B cell	MGAT4A	4.03107e-231	-3.2701	0.053	0.442	1.47541e-226
B cell	PSD3	7.12881e-231	3.58131	0.137	0.015	2.60922e-226
B cell	DMXL1	3.54148e-230	1.85727	0.536	0.242	1.29622e-225
B cell	CELSR1	1.84395e-229	4.60906	0.079	0.005	6.74905e-225
B cell	TBC1D5	1.32971e-228	1.4983	0.764	0.482	4.86687e-224
B cell	SCN3A	1.67313e-227	7.77716	0.046	0	6.12382e-223
B cell	ARL11	2.63566e-226	4.56035	0.088	0.008	9.64677e-222
B cell	VAV3	3.75109e-226	1.94778	0.489	0.202	1.37294e-221
B cell	FNDC3B	8.33595e-226	-3.59032	0.059	0.461	3.05104e-221
B cell	FARP2	8.70453e-225	2.56863	0.282	0.075	3.18594e-220
B cell	IFNLR1	4.47732e-224	3.21266	0.154	0.021	1.63874e-219
B cell	NKG7	4.77612e-224	-4.83171	0.104	0.519	1.74811e-219
B cell	UVRAG	1.07017e-223	1.58822	0.667	0.366	3.91693e-219
B cell	AC007381.1	3.27169e-222	5.60611	0.059	0.001	1.19747e-217
B cell	AC132153.1	7.69841e-222	4.77994	0.069	0.004	2.8177e-217
B cell	AC027097.2	7.67306e-220	2.27789	0.35	0.109	2.80842e-215
B cell	HLA-DQB2	1.50482e-219	3.70144	0.129	0.02	5.50778e-215
B cell	AC002480.2	7.48693e-219	6.30516	0.057	0.001	2.74029e-214
B cell	CD3E	1.38386e-218	-4.51812	0.021	0.384	5.06506e-214
B cell	PRKCA	4.58254e-218	-4.31818	0.035	0.407	1.67725e-213
B cell	SP140	1.20969e-216	1.56353	0.678	0.376	4.42758e-212
B cell	SLCO3A1	1.82408e-216	-4.54016	0.023	0.384	6.6763e-212
B cell	TC2N	5.6875e-216	-3.20548	0.08	0.471	2.08168e-211
B cell	PCED1B-AS1	2.12568e-215	-2.21004	0.174	0.574	7.78019e-211
B cell	JAZF1	7.75846e-215	1.52471	0.637	0.332	2.83968e-210
B cell	DGKD	1.49961e-212	2.13578	0.399	0.145	5.48873e-208
B cell	TRBC1	2.07136e-211	-4.03722	0.048	0.428	7.58137e-207
B cell	CHST15	6.37486e-210	3.79553	0.151	0.021	2.33326e-205
B cell	INPP4B	9.43302e-210	-4.19264	0.039	0.421	3.45258e-205
B cell	AC108879.1	2.49255e-209	6.87486	0.052	0.001	9.12297e-205
B cell	IGHA1	1.11152e-208	7.07942	0.062	0.001	4.06826e-204
B cell	STAT4	1.80235e-208	-2.22964	0.151	0.547	6.59679e-204
B cell	GBP4	1.86613e-208	1.52843	0.764	0.498	6.83024e-204
B cell	SESTD1	2.03292e-208	2.63764	0.218	0.06	7.44069e-204
B cell	P2RY14	6.22173e-208	3.17064	0.201	0.044	2.27722e-203
B cell	SESN3	1.73397e-207	1.59161	0.408	0.145	6.34652e-203
B cell	GZMM	1.30562e-206	-4.02292	0.037	0.403	4.77872e-202
B cell	ENTPD1	1.47343e-206	2.98862	0.213	0.047	5.39291e-202
B cell	GZMA	1.59746e-206	-4.98865	0.048	0.447	5.84687e-202
B cell	GIMAP1	4.3335e-206	-4.05437	0.035	0.387	1.58611e-201
B cell	HLA-DRB5	5.83285e-205	2.67066	0.162	0.043	2.13488e-200
B cell	AC107884.1	6.42889e-205	3.92792	0.088	0.008	2.35304e-200
B cell	LARGE-AS1	8.21484e-205	4.71616	0.068	0.003	3.00671e-200
B cell	CR2	1.74156e-204	7.07292	0.045	0.001	6.3743e-200
B cell	GNB4	6.68299e-203	2.45967	0.273	0.08	2.44604e-198
B cell	IGHG3	2.80272e-202	6.99247	0.05	0	1.02582e-197
B cell	MYO1E	2.96763e-202	2.62387	0.234	0.063	1.08618e-197
B cell	LINC01480	4.3609e-202	6.034	0.053	0.001	1.59613e-197
B cell	CD3G	8.17598e-202	-4.56912	0.03	0.38	2.99249e-197
B cell	C12orf42	4.06154e-201	3.06459	0.133	0.02	1.48656e-196
B cell	AL157871.4	3.1341e-200	1.83435	0.387	0.155	1.14711e-195
B cell	ACSM3	3.29289e-200	3.60618	0.151	0.023	1.20523e-195
B cell	RB1	1.30195e-199	1.44624	0.704	0.431	4.76527e-195
B cell	SEMA7A	5.38543e-199	4.09294	0.113	0.011	1.97112e-194
B cell	U62317.4	3.06777e-198	4.69255	0.073	0.005	1.12284e-193
B cell	FYN	2.05535e-197	-2.11435	0.232	0.604	7.52278e-193
B cell	TCL6	8.40105e-197	5.70113	0.046	0.001	3.07487e-192
B cell	LGALS1	4.59865e-194	-2.84736	0.174	0.555	1.68315e-189
B cell	LINC01781	7.9995e-194	6.36029	0.043	0.001	2.9279e-189
B cell	BCL7A	6.19902e-192	3.38499	0.107	0.016	2.2689e-187
B cell	DHTKD1	7.40889e-192	2.72514	0.203	0.047	2.71173e-187
B cell	DAPP1	7.31252e-190	1.97998	0.38	0.14	2.67645e-185
B cell	UPP1	1.52868e-189	-3.27671	0.05	0.394	5.59512e-185
B cell	TNIK	2.24832e-189	-2.72057	0.075	0.423	8.22909e-185
B cell	CST7	3.08005e-189	-4.51734	0.033	0.401	1.12733e-184
B cell	KCNG1	4.01101e-188	8.46116	0.04	0	1.46807e-183
B cell	GRAP2	7.22848e-188	-3.17696	0.059	0.408	2.6457e-183
B cell	RGS7	3.54093e-187	5.13985	0.065	0.003	1.29602e-182
B cell	SRGN	3.67549e-187	-2.07685	0.189	0.577	1.34527e-182
B cell	CHL1	2.50968e-185	7.10672	0.044	0	9.18567e-181
B cell	NIBAN1	3.7528e-185	-3.78355	0.042	0.386	1.37356e-180
B cell	RBMS1	3.27611e-184	-1.94419	0.157	0.535	1.19909e-179
B cell	SAMHD1	9.12691e-184	-2.27437	0.125	0.494	3.34054e-179
B cell	HLA-DQA2	1.14553e-183	4.32183	0.06	0.006	4.19275e-179
B cell	GRAMD1C	1.15699e-183	3.76315	0.097	0.011	4.23471e-179
B cell	RAPGEF5	1.22094e-183	5.58136	0.059	0.002	4.46876e-179
B cell	GPRIN3	2.53694e-180	-4.45786	0.024	0.339	9.28544e-176
B cell	LAMC1	5.07736e-180	4.96018	0.07	0.004	1.85836e-175
B cell	CBFA2T3	5.80378e-180	5.23262	0.078	0.004	2.12424e-175
B cell	THEMIS	4.58542e-179	-4.03773	0.039	0.374	1.67831e-174
B cell	SERINC5	1.08391e-178	-3.22969	0.07	0.422	3.96723e-174
B cell	IGHV3-23	2.42313e-177	7.88763	0.04	0	8.86891e-173
B cell	CDCA7L	4.37194e-175	2.74501	0.162	0.035	1.60017e-170
B cell	TLR6	5.64671e-175	4.63851	0.068	0.005	2.06675e-170
B cell	LIX1-AS1	1.20369e-173	2.89033	0.198	0.046	4.40564e-169
B cell	RIPOR2	2.08776e-173	1.15897	0.836	0.63	7.64143e-169
B cell	OPTN	5.89449e-173	-2.11068	0.13	0.491	2.15744e-168
B cell	GAB1	1.38687e-172	3.6622	0.124	0.021	5.07608e-168
B cell	SEL1L3	3.59582e-172	2.1131	0.35	0.132	1.31611e-167
B cell	CCND2	1.23704e-171	-2.49353	0.097	0.429	4.52768e-167
B cell	GIMAP5	1.59788e-171	-3.59668	0.035	0.338	5.84842e-167
B cell	CNR1	4.63893e-171	9.13018	0.041	0	1.6979e-166
B cell	AOAH	8.07332e-171	-4.27056	0.033	0.368	2.95492e-166
B cell	IGKV3-20	9.81233e-171	7.50949	0.039	0	3.59141e-166
B cell	CXXC5	1.04503e-170	2.50486	0.201	0.055	3.82492e-166
B cell	SKAP2	2.04566e-170	1.78712	0.393	0.175	7.4873e-166
B cell	CTSC	3.88385e-170	-3.12774	0.122	0.472	1.42153e-165
B cell	INPP5A	8.6467e-170	2.68458	0.212	0.05	3.16478e-165
B cell	GZMB	4.27859e-169	-5.36506	0.048	0.4	1.56601e-164
B cell	LINC01754	9.97641e-169	7.15856	0.039	0	3.65147e-164
B cell	CPNE5	1.11016e-168	3.80583	0.084	0.009	4.06328e-164
B cell	GNLY	1.8535e-168	-4.928	0.14	0.491	6.784e-164
B cell	RPL18A	1.25567e-167	0.5689	0.998	0.987	4.59588e-163
B cell	TMEM131L	8.44081e-167	1.51226	0.586	0.332	3.08942e-162
B cell	PPP1R14A	1.15102e-166	6.16121	0.05	0.001	4.21285e-162
B cell	CDC14A	1.37001e-166	-2.61501	0.096	0.427	5.01437e-162
B cell	PDE7B	1.67709e-166	2.77469	0.122	0.021	6.1383e-162
B cell	PRKCQ-AS1	2.92512e-166	-3.38721	0.048	0.349	1.07062e-161
B cell	VAV3-AS1	1.00755e-165	5.42241	0.051	0.002	3.68775e-161
B cell	CTSW	2.72386e-163	-5.59531	0.015	0.335	9.9696e-159
B cell	CD200	5.46984e-163	3.9771	0.058	0.005	2.00202e-158
B cell	ST6GAL1	1.01129e-162	1.35663	0.634	0.365	3.70144e-158
B cell	GGA2	1.54675e-162	1.84341	0.391	0.159	5.66127e-158
B cell	RNF125	8.41185e-162	-3.40209	0.044	0.346	3.07882e-157
B cell	PMAIP1	1.61104e-161	1.71806	0.424	0.198	5.89657e-157
B cell	PTPRO	2.6103e-161	3.72779	0.087	0.01	9.55395e-157
B cell	TMEM154	3.34917e-161	2.06804	0.264	0.084	1.22583e-156
B cell	SOX5	2.01341e-160	6.04781	0.071	0.003	7.36927e-156
B cell	PDE4B	4.49508e-159	1.53177	0.565	0.305	1.64524e-154
B cell	CCSER2	6.49933e-159	-1.5395	0.262	0.621	2.37882e-154
B cell	AC021678.2	1.89617e-158	6.3691	0.04	0.001	6.94018e-154
B cell	DSP	4.71965e-158	6.23602	0.034	0.001	1.72744e-153
B cell	LMBRD1	1.96293e-156	1.71997	0.441	0.205	7.18453e-152
B cell	AL078600.1	2.69167e-155	2.40486	0.169	0.043	9.85179e-151
B cell	LINC00861	4.78551e-155	-3.75263	0.035	0.323	1.75155e-150
B cell	CXCR5	6.68977e-154	2.4586	0.122	0.024	2.44852e-149
B cell	MAPK10	1.7555e-152	3.78007	0.06	0.005	6.4253e-148
B cell	TRAK1	2.08931e-152	2.03776	0.282	0.107	7.64707e-148
B cell	AL050309.1	4.75796e-152	2.21416	0.278	0.091	1.74146e-147
B cell	ISG20	2.85359e-151	0.706263	0.967	0.882	1.04444e-146
B cell	CAMK1D	6.5871e-151	1.30026	0.655	0.434	2.41094e-146
B cell	RPS11	1.10443e-150	0.57567	0.989	0.963	4.04233e-146
B cell	TGFBR2	1.51942e-150	1.27916	0.671	0.423	5.56122e-146
B cell	C12orf74	4.71065e-150	4.92405	0.056	0.003	1.72414e-145
B cell	MAP4K4	7.93461e-150	1.41004	0.56	0.314	2.90415e-145
B cell	CRIP1	1.62603e-149	-2.11714	0.226	0.545	5.95143e-145
B cell	LEPROTL1	3.29438e-149	-1.92529	0.149	0.483	1.20578e-144
B cell	PAG1	4.46487e-149	-2.11769	0.109	0.429	1.63419e-144
B cell	RASGRP1	4.1929e-148	-2.07937	0.124	0.435	1.53464e-143
B cell	KIAA0040	2.44409e-147	1.93507	0.362	0.147	8.94563e-143
B cell	HS3ST1	1.65886e-146	5.7087	0.046	0.002	6.0716e-142
B cell	AC096733.2	5.14112e-146	6.18672	0.039	0.001	1.8817e-141
B cell	LINC02202	1.28929e-145	7.22489	0.035	0	4.71891e-141
B cell	TNFAIP3	3.49002e-145	-2.85859	0.068	0.37	1.27738e-140
B cell	AP001059.2	1.92754e-144	6.26182	0.035	0.001	7.05498e-140
B cell	SYNGR2	2.97261e-144	2.09489	0.313	0.119	1.088e-139
B cell	GCNT1	1.23229e-143	2.00403	0.254	0.095	4.51031e-139
B cell	AC079630.1	9.88567e-143	4.16991	0.08	0.01	3.61825e-138
B cell	ITGB1	4.27822e-142	-2.31602	0.111	0.418	1.56587e-137
B cell	ITPR1	1.13737e-141	1.57517	0.46	0.24	4.16288e-137
B cell	LEF1	1.29958e-141	-3.73745	0.037	0.316	4.75659e-137
B cell	SPATA13	3.0558e-141	-2.55051	0.071	0.352	1.11845e-136
B cell	TSBP1	4.28957e-141	4.82163	0.045	0.002	1.57003e-136
B cell	PLEKHF2	4.58346e-141	1.93712	0.267	0.102	1.67759e-136
B cell	SEMA4B	5.35029e-141	2.98891	0.093	0.016	1.95826e-136
B cell	LINC02605	9.21327e-141	3.93609	0.053	0.006	3.37215e-136
B cell	P2RX5	9.67615e-140	2.28345	0.172	0.048	3.54157e-135
B cell	AP001021.3	6.59915e-139	2.92899	0.134	0.026	2.41535e-134
B cell	PHACTR2	8.29853e-139	-2.26637	0.1	0.405	3.03734e-134
B cell	EFHD2	3.18254e-138	-2.35649	0.127	0.447	1.16484e-133
B cell	ZDHHC21	8.04253e-138	1.85938	0.288	0.11	2.94365e-133
B cell	FCMR	1.90695e-137	1.77813	0.282	0.1	6.97962e-133
B cell	SYN3	2.58541e-137	4.87425	0.063	0.004	9.46285e-133
B cell	SAMD3	2.77222e-137	-4.62895	0.019	0.293	1.01466e-132
B cell	NELL2	1.1118e-135	-4.03351	0.035	0.32	4.06929e-131
B cell	INPP5D	2.79332e-135	1.38134	0.521	0.297	1.02238e-130
B cell	AC006230.1	3.4133e-135	5.73216	0.037	0.001	1.2493e-130
B cell	NFKBIA	3.70387e-135	-1.60402	0.222	0.55	1.35565e-130
B cell	ZFP36L1	1.33234e-134	1.6008	0.479	0.248	4.87649e-130
B cell	ARID5B	2.56079e-134	1.25662	0.622	0.376	9.37275e-130
B cell	PIM1	4.92754e-134	-2.78831	0.051	0.315	1.80353e-129
B cell	TMEM131	1.22347e-133	1.45006	0.515	0.296	4.47804e-129
B cell	LCK	1.41392e-133	-2.25723	0.082	0.354	5.1751e-129
B cell	SYTL3	3.13113e-133	-3.20045	0.048	0.313	1.14602e-128
B cell	OSBPL10-AS1	5.84408e-133	6.79695	0.027	0	2.13899e-128
B cell	IGHG4	6.21431e-133	6.56144	0.03	0	2.2745e-128
B cell	IKZF1	7.28959e-133	-1.3268	0.411	0.712	2.66806e-128
B cell	IQSEC1	1.21904e-132	1.87101	0.384	0.174	4.46182e-128
B cell	CLECL1	7.12586e-132	2.52696	0.146	0.034	2.60814e-127
B cell	CLIC4	1.41974e-131	1.92744	0.245	0.098	5.19639e-127
B cell	ATP8A1	1.77141e-131	1.44753	0.47	0.243	6.48355e-127
B cell	AC105046.2	1.84553e-131	8.06254	0.027	0	6.75483e-127
B cell	AC022182.1	2.57897e-131	2.88469	0.107	0.019	9.4393e-127
B cell	LINC00494	3.13224e-131	8.0737	0.028	0	1.14643e-126
B cell	IGKV4-1	3.20255e-131	7.71969	0.03	0	1.17217e-126
B cell	FLNA	1.48758e-130	-1.82545	0.165	0.476	5.44468e-126
B cell	TRAC	2.2206e-130	-2.82072	0.08	0.368	8.12763e-126
B cell	ARID1B	1.14001e-129	1.08889	0.743	0.567	4.17256e-125
B cell	CD6	1.56513e-129	-3.20024	0.042	0.301	5.72855e-125
B cell	LINC01358	2.2724e-129	2.51478	0.122	0.026	8.31722e-125
B cell	IGKV3-11	8.40581e-129	7.47647	0.032	0	3.07661e-124
B cell	LDHA	2.42553e-128	-1.64146	0.197	0.515	8.8777e-124
B cell	GPM6A	2.90168e-128	4.14006	0.078	0.008	1.06204e-123
B cell	SYNE2	7.01747e-128	-0.99965	0.568	0.798	2.56846e-123
B cell	MYBL1	3.60577e-127	-4.03208	0.025	0.284	1.31975e-122
B cell	DENND5B-AS1	4.79804e-127	5.64012	0.028	0.001	1.75613e-122
B cell	AC136424.2	8.99363e-127	7.75634	0.032	0	3.29176e-122
B cell	RGS10	6.79848e-126	-1.76211	0.148	0.439	2.48831e-121
B cell	ATP2B4	8.06559e-126	-3.34861	0.031	0.269	2.95209e-121
B cell	LTB	1.23002e-125	-1.63856	0.707	0.816	4.502e-121
B cell	GBP2	2.20927e-125	1.19328	0.696	0.493	8.08614e-121
B cell	TYROBP	2.77878e-125	-3.95878	0.046	0.327	1.01706e-120
B cell	PYHIN1	4.11243e-125	-3.13065	0.039	0.288	1.50519e-120
B cell	ARL4C	2.58692e-124	-1.42451	0.257	0.571	9.46838e-120
B cell	UGDH-AS1	3.06588e-124	3.00337	0.107	0.021	1.12214e-119
B cell	INPP5F	3.23718e-124	2.24956	0.191	0.06	1.18484e-119
B cell	EBLN3P	4.40203e-124	1.78397	0.288	0.11	1.61119e-119
B cell	JAK2	5.69018e-124	1.22283	0.575	0.359	2.08266e-119
B cell	SKAP1	7.33141e-124	-1.15069	0.356	0.672	2.68337e-119
B cell	PBX3	1.39722e-123	1.7398	0.419	0.214	5.11396e-119
B cell	TXN	1.46043e-123	-1.6454	0.366	0.654	5.3453e-119
B cell	CD226	2.94353e-123	-3.63977	0.028	0.265	1.07736e-118
B cell	ID2	8.29054e-123	-4.04363	0.023	0.269	3.03442e-118
B cell	KYNU	1.91492e-122	0.624045	0.242	0.104	7.0088e-118
B cell	TXK	2.56545e-122	-3.05614	0.053	0.307	9.38979e-118
B cell	JADE3	2.91123e-122	4.055	0.052	0.005	1.06554e-117
B cell	ZNF318	3.20391e-122	2.63392	0.16	0.04	1.17266e-117
B cell	GAPDH	1.05459e-121	-1.20356	0.452	0.726	3.85992e-117
B cell	UBR5-AS1	1.57233e-121	2.8999	0.111	0.022	5.75489e-117
B cell	TSPAN3	3.21127e-121	2.06118	0.201	0.074	1.17536e-116
B cell	PREX1	3.93044e-121	-2.12621	0.1	0.371	1.43858e-116
B cell	LINC00278	7.72797e-121	1.43574	0.486	0.271	2.82852e-116
B cell	ACSM1	8.60364e-121	3.99602	0.047	0.004	3.14902e-116
B cell	PRKCB	1.14945e-120	1.17095	0.645	0.445	4.20712e-116
B cell	HLA-A	4.29861e-120	-0.497207	0.991	0.994	1.57334e-115
B cell	SETX	6.59401e-120	1.14983	0.653	0.464	2.41347e-115
B cell	MYO1F	2.41663e-119	-2.59656	0.067	0.339	8.84511e-115
B cell	HDGFL3	4.67033e-119	-3.52618	0.026	0.267	1.70939e-114
B cell	TMEM156	1.04673e-118	1.66169	0.31	0.134	3.83114e-114
B cell	TGFBR3	1.37345e-118	-4.86066	0.014	0.252	5.02698e-114
B cell	NDUFS5	2.61666e-118	-1.23909	0.26	0.566	9.57724e-114
B cell	CCL4	2.91425e-118	-2.42691	0.075	0.352	1.06664e-113
B cell	FAM117B	3.66763e-118	1.72368	0.25	0.094	1.34239e-113
B cell	TRIO	7.33044e-118	2.00496	0.244	0.096	2.68301e-113
B cell	MAL	1.10362e-117	-4.3629	0.026	0.274	4.03937e-113
B cell	GNAQ	2.54266e-117	-3.81105	0.019	0.251	9.3064e-113
B cell	RNASET2	2.61883e-117	1.2451	0.51	0.296	9.58519e-113
B cell	WNT16	4.72779e-117	6.58726	0.032	0	1.73042e-112
B cell	UST	6.11099e-117	1.72209	0.273	0.111	2.23668e-112
B cell	NETO1	9.72455e-117	8.63915	0.028	0	3.55928e-112
B cell	AC016074.2	1.21934e-116	-3.21157	0.038	0.266	4.4629e-112
B cell	RPS8	6.11493e-116	0.457776	0.997	0.982	2.23813e-111
B cell	PLEKHA2	2.06527e-115	1.29002	0.535	0.327	7.55908e-111
B cell	PRF1	2.71947e-115	-4.66242	0.018	0.26	9.95355e-111
B cell	RASGRP3	4.92131e-115	1.72626	0.282	0.116	1.80125e-110
B cell	ATP10A	9.80359e-115	-3.69034	0.025	0.251	3.58821e-110
B cell	PPP1R16B	1.53489e-114	1.07413	0.634	0.423	5.61785e-110
B cell	RPS5	2.38237e-114	0.56105	0.966	0.928	8.71972e-110
B cell	MYL12B	3.05297e-114	-0.854294	0.633	0.834	1.11742e-109
B cell	MARCKSL1	5.01506e-114	2.28691	0.184	0.054	1.83556e-109
B cell	CISH	5.1344e-114	-3.63805	0.024	0.241	1.87924e-109
B cell	MLLT3	2.07867e-113	-1.83943	0.134	0.413	7.60815e-109
B cell	AP000787.1	3.07365e-113	1.52066	0.282	0.105	1.12498e-108
B cell	KLRD1	3.30202e-113	-4.98815	0.015	0.261	1.20857e-108
B cell	ANKRD13A	3.59418e-113	1.48691	0.401	0.208	1.31551e-108
B cell	RNF213	3.75567e-113	-0.705008	0.832	0.952	1.37461e-108
B cell	CHI3L2	4.83899e-113	2.54155	0.131	0.032	1.77112e-108
B cell	MYL12A	5.82367e-113	-0.721361	0.8	0.928	2.13152e-108
B cell	HERPUD1	9.39343e-113	1.52044	0.444	0.234	3.43809e-108
B cell	TREML2	1.43412e-112	4.27088	0.048	0.004	5.24902e-108
B cell	PLAC8	1.50208e-112	1.15741	0.575	0.367	5.49776e-108
B cell	TSPAN14	2.26863e-112	-2.41919	0.06	0.309	8.30341e-108
B cell	GZMH	3.79742e-112	-4.87969	0.021	0.271	1.38989e-107
B cell	LINC00426	5.78703e-112	2.62331	0.11	0.023	2.11811e-107
B cell	AL355347.1	8.17576e-112	5.4025	0.031	0.001	2.99241e-107
B cell	AC025164.1	3.43443e-111	1.81912	0.232	0.081	1.25704e-106
B cell	ATP2B1	3.64998e-111	1.4399	0.444	0.253	1.33593e-106
B cell	INPP4A	5.25305e-111	-1.82166	0.116	0.371	1.92267e-106
B cell	DLEU2	5.45843e-111	1.01804	0.668	0.471	1.99784e-106
B cell	CHD9	5.87538e-111	1.35949	0.442	0.26	2.15045e-106
B cell	BTG2	1.65098e-110	1.21533	0.542	0.352	6.04274e-106
B cell	C1orf21	4.7035e-110	-4.63643	0.016	0.245	1.72153e-105
B cell	LIME1	4.96962e-110	-3.17267	0.039	0.271	1.81893e-105
B cell	IGHG2	5.21625e-110	7.51105	0.027	0	1.9092e-105
B cell	TCTN1	5.56636e-110	3.3268	0.059	0.009	2.03734e-105
B cell	BEND5	6.07714e-110	3.32791	0.046	0.005	2.2243e-105
B cell	LIX1	2.93947e-109	4.50963	0.045	0.002	1.07587e-104
B cell	CD7	3.26896e-109	-4.90256	0.01	0.213	1.19647e-104
B cell	NCALD	4.34421e-109	-4.45716	0.012	0.228	1.59003e-104
B cell	PCDH9-AS2	2.26407e-108	6.44176	0.024	0	8.28671e-104
B cell	IGLV10-54	2.28238e-108	6.70539	0.018	0	8.35373e-104
B cell	PLCL1	5.06818e-108	-3.72287	0.037	0.271	1.85501e-103
B cell	CKLF	5.21432e-108	-1.79308	0.154	0.439	1.90849e-103
B cell	RORA-AS1	1.84341e-107	-2.30793	0.088	0.349	6.74707e-103
B cell	ARHGAP26	2.0036e-107	-1.85789	0.129	0.405	7.33336e-103
B cell	ACTB	2.07485e-107	-0.620663	0.921	0.967	7.59414e-103
B cell	LPAR5	8.8634e-107	2.79994	0.093	0.017	3.24409e-102
B cell	EPB41L2	1.95122e-106	2.06691	0.227	0.087	7.14165e-102
B cell	KLK1	2.33868e-106	6.9793	0.032	0	8.55979e-102
B cell	REL	5.26564e-106	1.44669	0.437	0.248	1.92728e-101
B cell	POLD4	5.63857e-106	1.42682	0.41	0.23	2.06377e-101
B cell	ZFYVE28	1.00445e-105	-4.17307	0.017	0.225	3.67638e-101
B cell	MALAT1	3.09987e-105	0.284887	1	0.999	1.13458e-100
B cell	MT-CO2	7.12241e-105	0.573333	0.997	0.992	2.60687e-100
B cell	ENO1	9.11297e-105	-1.26495	0.283	0.571	3.33544e-100
B cell	FAM107B	1.53241e-104	1.09566	0.693	0.541	5.60877e-100
B cell	IGHG1	1.72146e-104	6.08989	0.029	0.001	6.3007e-100
B cell	EVI5	3.47452e-104	2.44385	0.171	0.054	1.27171e-99
B cell	RBPJ	4.22639e-104	-1.69406	0.165	0.441	1.5469e-99
B cell	HOPX	5.16108e-104	-3.923	0.021	0.253	1.88901e-99
B cell	PHKB	1.22701e-103	1.43502	0.407	0.22	4.49097e-99
B cell	LINC01342	1.7025e-103	5.65478	0.027	0.001	6.23132e-99
B cell	LILRB1	1.8743e-103	1.92888	0.19	0.074	6.86014e-99
B cell	MAN1C1	1.90099e-103	-3.67771	0.025	0.236	6.95781e-99
B cell	DSTN	2.37268e-103	-2.30133	0.061	0.285	8.68424e-99
B cell	RNF144A	8.89892e-103	-3.43363	0.028	0.231	3.25709e-98
B cell	BMF	9.63804e-103	3.28045	0.065	0.008	3.52762e-98
B cell	PIK3C2B	1.47374e-102	2.18442	0.136	0.037	5.39403e-98
B cell	EIF4G3	1.76445e-102	1.26258	0.5	0.304	6.45805e-98
B cell	CD5L	1.83068e-102	6.42392	0.026	0	6.70048e-98
B cell	DRAM2	2.87639e-102	1.85015	0.248	0.102	1.05279e-97
B cell	RASGEF1B	4.20875e-102	1.71099	0.256	0.113	1.54044e-97
B cell	HIVEP3	9.09227e-102	-2.01716	0.08	0.32	3.32786e-97
B cell	EFCAB13	1.68457e-101	2.20651	0.162	0.05	6.16569e-97
B cell	TRG-AS1	4.78626e-101	-4.25489	0.014	0.215	1.75182e-96
B cell	CLEC2D	1.0357e-100	0.900753	0.772	0.611	3.79078e-96
B cell	OTULINL	1.16333e-100	-3.78068	0.018	0.216	4.2579e-96
B cell	ANKRD33B	1.89816e-100	2.42671	0.125	0.03	6.94747e-96
B cell	MFN1	3.71497e-100	1.70499	0.237	0.101	1.35972e-95
B cell	CHD7	4.10135e-100	1.23454	0.346	0.175	1.50113e-95
B cell	AC010609.1	1.06845e-99	-3.8091	0.019	0.208	3.91062e-95
B cell	ARHGAP10	1.12841e-99	-4.76335	0.01	0.216	4.1301e-95
B cell	AC025887.2	1.28333e-99	4.83095	0.023	0.001	4.6971e-95
B cell	IQCB1	2.90052e-99	1.52901	0.349	0.174	1.06162e-94
B cell	ACTG1	5.1806e-99	-0.648118	0.696	0.89	1.89615e-94
B cell	ADK	9.76729e-99	1.09411	0.633	0.461	3.57493e-94
B cell	HLA-B	2.27466e-98	-0.464447	0.984	0.992	8.32547e-94
B cell	SPOCK2	2.45639e-98	-2.59954	0.053	0.272	8.99063e-94
B cell	MACC1	2.5999e-98	3.51514	0.06	0.007	9.51589e-94
B cell	IL2RB	3.38226e-98	-3.75504	0.025	0.223	1.23794e-93
B cell	AL133346.1	1.26463e-97	7.39665	0.021	0	4.62867e-93
B cell	MDM4	1.42849e-97	1.3358	0.452	0.266	5.2284e-93
B cell	RSAD2	1.73095e-97	-1.35152	0.243	0.529	6.33543e-93
B cell	GABBR1	3.87615e-97	2.54141	0.091	0.02	1.41871e-92
B cell	MAP2	4.06272e-97	5.58445	0.031	0.001	1.487e-92
B cell	HMGCS1	7.83899e-97	1.78631	0.293	0.141	2.86915e-92
B cell	CLNK	9.05292e-97	3.3403	0.079	0.013	3.31346e-92
B cell	AC068587.4	3.4723e-96	-2.10393	0.068	0.293	1.2709e-91
B cell	ICOS	3.51157e-96	-4.04528	0.019	0.21	1.28527e-91
B cell	ARHGAP20	5.24956e-96	5.29035	0.028	0.001	1.92139e-91
B cell	HMGA1P4	1.24659e-95	2.13807	0.165	0.053	4.56263e-91
B cell	SYNE1	1.31177e-95	-1.89719	0.134	0.389	4.80119e-91
B cell	PLD4	1.69379e-95	5.19921	0.024	0.001	6.19942e-91
B cell	SLFN12L	1.78054e-95	-1.18802	0.305	0.578	6.51695e-91
B cell	GNG2	2.25335e-95	-1.70077	0.193	0.454	8.2475e-91
B cell	CD63	2.29368e-95	-1.90243	0.331	0.573	8.39511e-91
B cell	LAT	2.64215e-95	-4.68684	0.009	0.188	9.67054e-91
B cell	AC104699.1	3.31635e-95	3.88899	0.044	0.004	1.21382e-90
B cell	RAB31	2.44782e-94	1.77514	0.215	0.082	8.95926e-90
B cell	C7orf50	2.61078e-94	1.68231	0.313	0.155	9.55571e-90
B cell	TCF7	4.54744e-94	-2.60268	0.053	0.261	1.66441e-89
B cell	TMCC3	5.28088e-94	2.3452	0.11	0.028	1.93286e-89
B cell	TRDC	6.96444e-94	-5.23869	0.01	0.224	2.54905e-89
B cell	IGKV1-5	7.0875e-94	8.20839	0.018	0	2.5941e-89
B cell	ALPK1	8.69543e-94	1.30341	0.387	0.209	3.18261e-89
B cell	LINC02550	1.28029e-93	8.89125	0.019	0	4.68598e-89
B cell	GDI2	1.30912e-93	1.1724	0.541	0.361	4.79151e-89
B cell	OFD1	3.45578e-93	1.17133	0.432	0.259	1.26485e-88
B cell	ZEB1-AS1	3.80251e-93	2.58433	0.089	0.02	1.39176e-88
B cell	AC007384.1	3.92915e-93	1.72783	0.25	0.106	1.43811e-88
B cell	LINC01934	5.35307e-93	-3.30993	0.035	0.238	1.95928e-88
B cell	AC008014.1	5.81328e-93	1.48904	0.311	0.151	2.12772e-88
B cell	KIF9-AS1	2.63096e-92	2.16976	0.131	0.04	9.62959e-88
B cell	GMFG	3.47095e-92	-0.904493	0.423	0.696	1.2704e-87
B cell	AC004054.1	3.83041e-92	10.0444	0.02	0	1.40197e-87
B cell	PKHD1L1	4.74773e-92	4.169	0.026	0.002	1.73772e-87
B cell	SOS1	4.89826e-92	-1.29049	0.427	0.672	1.79281e-87
B cell	C1orf220	7.91813e-92	5.08554	0.031	0.001	2.89811e-87
B cell	MT-ND3	8.47128e-92	0.452377	0.983	0.97	3.10057e-87
B cell	ENTPD1-AS1	1.34701e-91	1.70222	0.324	0.159	4.93021e-87
B cell	CLMN	1.88768e-91	3.83634	0.064	0.009	6.90911e-87
B cell	NUAK2	4.95584e-91	2.20161	0.118	0.031	1.81389e-86
B cell	MSMO1	9.54159e-91	1.70626	0.257	0.121	3.49232e-86
B cell	NUCB2	1.17123e-90	-2.27907	0.064	0.285	4.28681e-86
B cell	TLR1	1.3304e-90	2.0778	0.156	0.059	4.86938e-86
B cell	SLFN5	4.11078e-90	-1.03733	0.372	0.651	1.50459e-85
B cell	PPM1K	5.12378e-90	1.04694	0.594	0.414	1.87535e-85
B cell	PIK3R5	1.26133e-89	-1.97597	0.081	0.305	4.6166e-85
B cell	DOK6	1.44813e-89	-3.96516	0.017	0.201	5.30031e-85
B cell	ATP2B1-AS1	2.06064e-89	2.85269	0.083	0.018	7.54213e-85
B cell	AC099524.1	2.09403e-89	6.98199	0.015	0	7.66434e-85
B cell	ITGB2	2.32492e-89	-2.11265	0.086	0.321	8.50944e-85
B cell	PLCB1	2.41882e-89	-2.32664	0.052	0.27	8.85312e-85
B cell	IFI6	2.75922e-89	-1.10902	0.415	0.668	1.0099e-84
B cell	LINC01374	2.90147e-89	5.64929	0.032	0.001	1.06197e-84
B cell	IGHA2	3.80114e-89	6.91522	0.023	0	1.39126e-84
B cell	ZNF107	4.81427e-89	1.35707	0.358	0.19	1.76207e-84
B cell	PRMT2	6.24806e-89	-1.31967	0.232	0.491	2.28685e-84
B cell	SSBP2	1.66774e-88	1.54468	0.335	0.173	6.10408e-84
B cell	INKA1	2.58134e-88	4.29637	0.037	0.003	9.44796e-84
B cell	CDC42EP3	2.66492e-88	-2.61939	0.046	0.237	9.75388e-84
B cell	EPSTI1	3.70573e-88	0.669091	0.875	0.784	1.35634e-83
B cell	PTGER2	4.34447e-88	-3.5556	0.015	0.18	1.59012e-83
B cell	PDE7A	6.60588e-88	0.963853	0.628	0.459	2.41782e-83
B cell	BCAS4	1.05826e-87	1.67625	0.239	0.097	3.87333e-83
B cell	AF165147.1	1.32429e-87	-4.11835	0.015	0.198	4.84702e-83
B cell	LINC01013	1.44643e-87	8.01174	0.016	0	5.29409e-83
B cell	IL15	1.44706e-87	1.60049	0.277	0.134	5.29637e-83
B cell	XXYLT1-AS2	1.99811e-87	5.37684	0.029	0.001	7.31327e-83
B cell	KHDRBS2-OT	3.72555e-87	7.71997	0.017	0	1.36359e-82
B cell	NEDD9	6.78757e-87	1.29627	0.474	0.292	2.48432e-82
B cell	RRAS2	7.60962e-87	1.45378	0.255	0.121	2.7852e-82
B cell	AC016168.2	7.89875e-87	4.52997	0.037	0.002	2.89102e-82
B cell	FOXP1	8.41295e-87	0.714875	0.821	0.678	3.07922e-82
B cell	DOCK10	1.30076e-86	-0.784312	0.49	0.742	4.76093e-82
B cell	ENOSF1	1.48785e-86	-2.91391	0.035	0.225	5.44567e-82
B cell	TIAM1	1.69285e-86	-3.96561	0.019	0.202	6.19601e-82
B cell	FAM177B	1.8313e-86	4.22686	0.041	0.004	6.70272e-82
B cell	RPL8	2.21074e-86	0.432622	0.984	0.964	8.09152e-82
B cell	SEC62	1.0937e-85	1.05787	0.518	0.358	4.00307e-81
B cell	ERN1	4.02323e-85	-3.22358	0.03	0.223	1.47254e-80
B cell	ELL3	6.55876e-85	3.81511	0.03	0.002	2.40057e-80
B cell	HMGB2	6.59036e-85	-2.59052	0.118	0.346	2.41214e-80
B cell	PTPRK	8.03447e-85	1.32446	0.176	0.066	2.9407e-80
B cell	IPCEF1	1.18974e-84	-3.08951	0.025	0.192	4.35458e-80
B cell	AC133065.1	1.70434e-84	3.01368	0.087	0.019	6.23805e-80
B cell	PAXX	2.45491e-84	-1.53466	0.13	0.362	8.98521e-80
B cell	RPS23	2.56589e-84	0.400835	0.999	0.993	9.39141e-80
B cell	ZAP70	2.96064e-84	-3.43862	0.015	0.181	1.08362e-79
B cell	AL356276.1	7.26368e-84	2.86672	0.056	0.008	2.65858e-79
B cell	STOM	8.88413e-84	-2.18146	0.058	0.259	3.25168e-79
B cell	AC092384.1	1.51167e-83	5.10375	0.03	0.001	5.53285e-79
B cell	MT-CO1	2.22562e-83	0.697748	0.979	0.962	8.14599e-79
B cell	H2AFV	2.90333e-83	-1.42186	0.237	0.487	1.06265e-78
B cell	FAM135A	2.95715e-83	1.87527	0.169	0.065	1.08235e-78
B cell	STK33	3.25784e-83	4.0622	0.034	0.003	1.1924e-78
B cell	AC108471.3	3.6424e-83	3.87246	0.046	0.005	1.33315e-78
B cell	SQLE	4.39628e-83	1.53582	0.266	0.14	1.60908e-78
B cell	SYPL1	9.55079e-83	1.52237	0.306	0.154	3.49569e-78
B cell	TMEM123	1.35469e-82	-0.874219	0.391	0.656	4.95828e-78
B cell	SPATS2L	1.41512e-82	-2.06399	0.055	0.256	5.17948e-78
B cell	TRERF1	1.77032e-82	-3.70857	0.021	0.182	6.47956e-78
B cell	BICDL1	1.84817e-82	-2.60348	0.048	0.239	6.76447e-78
B cell	STMN1	2.37854e-82	-3.33156	0.078	0.306	8.70571e-78
B cell	MYCBP2	6.46952e-82	0.761995	0.758	0.631	2.36791e-77
B cell	NGLY1	8.60248e-82	1.22758	0.384	0.222	3.14859e-77
B cell	SPN	1.30182e-81	-3.75808	0.012	0.169	4.76481e-77
B cell	RHOH	2.05383e-81	1.05511	0.597	0.438	7.51723e-77
B cell	IGKV3-15	2.91089e-81	8.08532	0.018	0	1.06542e-76
B cell	RASA3	3.46831e-81	-2.12216	0.071	0.266	1.26944e-76
B cell	TRAT1	3.67886e-81	-3.9263	0.014	0.17	1.3465e-76
B cell	FUT8	4.85825e-81	1.24725	0.391	0.226	1.77817e-76
B cell	BEND4	4.98993e-81	4.97939	0.023	0.001	1.82636e-76
B cell	WASHC4	6.39351e-81	1.27551	0.44	0.272	2.34009e-76
B cell	TTC39C	7.13659e-81	-0.990439	0.367	0.621	2.61206e-76
B cell	PRKD1	7.58129e-81	5.4387	0.022	0.001	2.77483e-76
B cell	STK39	1.50176e-80	-2.03622	0.073	0.269	5.4966e-76
B cell	RPL36AL	1.53486e-80	-0.652781	0.677	0.857	5.61775e-76
B cell	ZNF627	2.07376e-80	2.04316	0.138	0.045	7.59015e-76
B cell	GNB5	3.93129e-80	1.60972	0.223	0.099	1.43889e-75
B cell	KLF6	3.99588e-80	-1.3515	0.219	0.467	1.46253e-75
B cell	GALNT2	4.75765e-80	1.62918	0.259	0.122	1.74135e-75
B cell	OASL	6.02712e-80	-1.9109	0.08	0.285	2.20599e-75
B cell	SYT1	9.68207e-80	5.20762	0.028	0.001	3.54374e-75
B cell	SEMA4D	1.84223e-79	-1.26717	0.203	0.447	6.74274e-75
B cell	TRIM22	2.95247e-79	0.783626	0.728	0.577	1.08063e-74
B cell	TMEM19	3.27192e-79	1.85798	0.128	0.05	1.19755e-74
B cell	C12orf75	3.74515e-79	-2.20331	0.089	0.301	1.37076e-74
B cell	FKBP11	6.19173e-79	-1.73495	0.101	0.314	2.26623e-74
B cell	AP001057.1	7.58852e-79	6.63213	0.021	0.001	2.77748e-74
B cell	PCNA	8.0817e-79	-2.64865	0.069	0.287	2.95798e-74
B cell	SOCS1	1.12534e-78	1.02889	0.602	0.438	4.11887e-74
B cell	GIMAP8	1.21252e-78	-3.58705	0.015	0.171	4.43793e-74
B cell	DTX4	1.70404e-78	4.70089	0.028	0.002	6.23695e-74
B cell	TIGIT	2.21575e-78	-4.01959	0.023	0.2	8.10985e-74
B cell	TTC39B	2.64631e-78	-1.80704	0.071	0.261	9.68577e-74
B cell	MGAT5	2.89464e-78	1.09785	0.476	0.307	1.05947e-73
B cell	ANK3	3.10337e-78	-1.99749	0.223	0.446	1.13586e-73
B cell	FAM3C	4.68446e-78	1.55378	0.298	0.153	1.71456e-73
B cell	AC018695.9	5.14151e-78	4.41478	0.032	0.002	1.88185e-73
B cell	CD44	8.09465e-78	-0.979996	0.432	0.659	2.96272e-73
B cell	CAPN2	1.11364e-77	-1.58364	0.098	0.299	4.07604e-73
B cell	AC139720.1	1.31247e-77	-4.41504	0.014	0.182	4.80377e-73
B cell	SP110	1.31583e-77	0.91185	0.654	0.513	4.81609e-73
B cell	FDFT1	1.93796e-77	1.29227	0.388	0.229	7.09314e-73
B cell	TESPA1	2.22855e-77	-2.10528	0.071	0.263	8.1567e-73
B cell	SLAMF6	6.07556e-77	1.57713	0.216	0.094	2.22372e-72
B cell	AC012236.1	8.64934e-77	6.44086	0.021	0	3.16575e-72
B cell	SURF4	9.69954e-77	-1.68108	0.088	0.289	3.55013e-72
B cell	AC022239.1	1.1561e-76	5.95216	0.015	0	4.23144e-72
B cell	PRDX2	1.62074e-76	-1.92584	0.081	0.286	5.93207e-72
B cell	LDHB	2.27156e-76	-1.43329	0.218	0.451	8.31412e-72
B cell	LGALS3	2.32266e-76	-3.29386	0.082	0.288	8.50116e-72
B cell	CAMK2D	2.54875e-76	0.806682	0.571	0.408	9.3287e-72
B cell	GSN	4.41994e-76	1.54095	0.187	0.095	1.61774e-71
B cell	EZR	9.49718e-76	0.967016	0.559	0.407	3.47606e-71
B cell	PTPN4	1.03009e-75	-1.44562	0.142	0.357	3.77024e-71
B cell	GATA3	1.5206e-75	-4.43778	0.01	0.158	5.56555e-71
B cell	ARHGAP42	1.53353e-75	2.71113	0.056	0.011	5.61286e-71
B cell	AL133259.1	2.08818e-75	2.46746	0.071	0.018	7.64296e-71
B cell	AMN1	2.38826e-75	1.71428	0.161	0.061	8.74126e-71
B cell	CD8A	2.43911e-75	-4.34733	0.015	0.18	8.92739e-71
B cell	CTSD	2.74867e-75	-3.52203	0.055	0.245	1.00604e-70
B cell	MT-ATP6	4.34167e-75	0.679606	0.98	0.97	1.5891e-70
B cell	PRAG1	5.96224e-75	1.87027	0.156	0.053	2.18224e-70
B cell	LINC01871	7.20545e-75	-3.98653	0.012	0.164	2.63727e-70
B cell	PSMA1	1.04318e-74	-1.0796	0.329	0.582	3.81813e-70
B cell	AC111006.1	1.0746e-74	5.08558	0.027	0.001	3.93315e-70
B cell	LINC02416	2.55811e-74	3.32461	0.041	0.004	9.36293e-70
B cell	MTPN	2.82069e-74	0.927739	0.616	0.477	1.0324e-69
B cell	ACADM	9.28379e-74	1.3777	0.345	0.192	3.39796e-69
B cell	CYP51A1	1.12705e-73	1.42209	0.338	0.184	4.12513e-69
B cell	OXNAD1	3.11222e-73	-1.58609	0.114	0.309	1.1391e-68
B cell	NIPSNAP3B	3.26717e-73	2.91096	0.044	0.007	1.19582e-68
B cell	BACE2	5.70265e-73	3.52989	0.03	0.004	2.08723e-68
B cell	KCNH8	5.92389e-73	5.14179	0.021	0.001	2.1682e-68
B cell	ESYT2	6.59052e-73	-1.5279	0.102	0.3	2.4122e-68
B cell	SDK2	7.52148e-73	3.92922	0.033	0.003	2.75294e-68
B cell	SSH2	8.35124e-73	0.82165	0.666	0.524	3.05664e-68
B cell	RFX3	8.80772e-73	1.24438	0.398	0.244	3.22372e-68
B cell	IKZF3	1.2034e-72	0.777858	0.672	0.51	4.40457e-68
B cell	SOWAHD	1.20685e-72	4.90236	0.026	0.002	4.41718e-68
B cell	QRSL1	1.48475e-72	1.55181	0.187	0.088	5.43432e-68
B cell	SDF2L1	2.3223e-72	-1.35486	0.149	0.376	8.49985e-68
B cell	SIK3	2.47821e-72	0.93559	0.611	0.472	9.0705e-68
B cell	SELL	4.64809e-72	0.830334	0.411	0.25	1.70125e-67
B cell	RPL13A	5.08186e-72	0.344123	0.997	0.993	1.86001e-67
B cell	AC006369.1	5.33809e-72	-2.9612	0.025	0.175	1.9538e-67
B cell	EEF1G	8.34001e-72	0.512196	0.896	0.832	3.05253e-67
B cell	MAP3K1	9.03688e-72	1.11593	0.367	0.22	3.30759e-67
B cell	AC023510.1	1.75002e-71	3.14024	0.046	0.006	6.40526e-67
B cell	MED13L	2.58102e-71	0.846495	0.661	0.539	9.4468e-67
B cell	CYB561A3	2.60059e-71	1.22823	0.223	0.113	9.51843e-67
B cell	RHBDD1	2.79622e-71	1.38499	0.308	0.165	1.02344e-66
B cell	NDFIP1	4.48004e-71	-1.33352	0.144	0.361	1.63974e-66
B cell	PRUNE2	5.99183e-71	3.1576	0.05	0.008	2.19307e-66
B cell	PARM1	6.43018e-71	5.52674	0.021	0.001	2.35351e-66
B cell	ZFP36L2	7.57878e-71	-1.08525	0.251	0.49	2.77391e-66
B cell	KIF21A	8.38636e-71	-3.46645	0.013	0.159	3.06949e-66
B cell	SYT17	1.02465e-70	3.93284	0.031	0.004	3.75033e-66
B cell	RASGRF2	1.07198e-70	-3.69579	0.014	0.157	3.92354e-66
B cell	SLC9A3R1	1.0986e-70	-2.39856	0.038	0.199	4.02098e-66
B cell	AP1B1	1.28442e-70	1.59758	0.231	0.12	4.70112e-66
B cell	LY9	1.68955e-70	1.68233	0.185	0.074	6.18391e-66
B cell	MYL6	2.07767e-70	-0.592684	0.763	0.869	7.60449e-66
B cell	DOK2	2.53805e-70	-3.58934	0.013	0.161	9.2895e-66
B cell	QSOX2	2.5418e-70	2.35396	0.082	0.021	9.30325e-66
B cell	SERPINB9P1	3.24414e-70	1.80434	0.117	0.045	1.18739e-65
B cell	ANKH	4.15915e-70	-1.69213	0.107	0.303	1.52229e-65
B cell	PIKFYVE	4.16926e-70	1.31981	0.304	0.173	1.52599e-65
B cell	ARAP2	4.9576e-70	-0.973799	0.37	0.603	1.81453e-65
B cell	AHNAK	7.78814e-70	-1.93874	0.08	0.271	2.85054e-65
B cell	TIMP1	8.35819e-70	-2.54285	0.041	0.218	3.05918e-65
B cell	PLAGL1	1.28218e-69	2.16157	0.132	0.047	4.69291e-65
B cell	ITM2B	1.51758e-69	-0.755034	0.535	0.742	5.55449e-65
B cell	LINC02245	1.82311e-69	1.70476	0.208	0.097	6.67278e-65
B cell	ITGAL	2.2273e-69	-1.12212	0.182	0.397	8.15214e-65
B cell	SLC12A6	2.58041e-69	1.44837	0.26	0.133	9.44456e-65
B cell	RIC1	3.15798e-69	1.36556	0.311	0.174	1.15585e-64
B cell	TNFSF14	3.73859e-69	-4.92647	0.006	0.147	1.36836e-64
B cell	NMRK1	4.59668e-69	-1.78184	0.067	0.245	1.68243e-64
B cell	NOP53	5.47283e-69	0.672472	0.758	0.626	2.00311e-64
B cell	YES1	1.07166e-68	-3.69207	0.014	0.152	3.92238e-64
B cell	RUBCN	1.18094e-68	1.53138	0.239	0.114	4.32238e-64
B cell	AFTPH	1.21589e-68	1.30025	0.342	0.199	4.45027e-64
B cell	FKBP5	1.47649e-68	-1.45096	0.132	0.346	5.40412e-64
B cell	CDK6	1.48792e-68	-1.60904	0.107	0.305	5.44592e-64
B cell	SYTL2	1.68638e-68	-4.24898	0.009	0.153	6.17232e-64
B cell	PPFIBP1	1.81673e-68	2.39837	0.067	0.016	6.6494e-64
B cell	MYDGF	2.32163e-68	-1.36206	0.153	0.378	8.4974e-64
B cell	PPP2R2B	3.60859e-68	-5.15256	0.006	0.146	1.32078e-63
B cell	GIMAP6	4.3818e-68	-3.60278	0.014	0.145	1.60378e-63
B cell	FLT3LG	5.46205e-68	-2.29341	0.044	0.199	1.99917e-63
B cell	FAM102A	9.56043e-68	-1.91395	0.09	0.27	3.49921e-63
B cell	RBL2	1.12845e-67	-1.21788	0.163	0.378	4.13023e-63
B cell	METTL7A	1.27577e-67	2.88674	0.048	0.008	4.66943e-63
B cell	ATP1B3	1.44309e-67	-1.65373	0.098	0.301	5.28184e-63
B cell	REX1BD	1.57165e-67	-1.10045	0.176	0.39	5.75239e-63
B cell	PTPRE	1.59146e-67	-2.4913	0.046	0.211	5.82489e-63
B cell	SNX25	1.60394e-67	1.38774	0.235	0.117	5.87056e-63
B cell	KLRB1	2.78943e-67	-4.44816	0.012	0.167	1.02096e-62
B cell	LIMD1	3.1623e-67	1.54956	0.216	0.103	1.15743e-62
B cell	IER3	3.61818e-67	-4.23577	0.01	0.164	1.32429e-62
B cell	ST18	6.82882e-67	3.3988	0.034	0.005	2.49942e-62
B cell	NDFIP2	7.06236e-67	-4.1006	0.012	0.151	2.58489e-62
B cell	HTT-AS	7.50553e-67	3.62998	0.037	0.004	2.7471e-62
B cell	LINC01550	1.02457e-66	-3.27635	0.02	0.157	3.75004e-62
B cell	CSGALNACT2	1.42119e-66	-1.26097	0.121	0.319	5.2017e-62
B cell	VPS13C	1.42193e-66	0.741038	0.701	0.575	5.20441e-62
B cell	GPR171	1.58565e-66	-3.27491	0.018	0.155	5.80365e-62
B cell	TPCN1	2.77871e-66	2.09986	0.14	0.049	1.01704e-61
B cell	TSPAN5	3.55625e-66	-1.87421	0.064	0.237	1.30162e-61
B cell	IGLV2-14	4.48575e-66	4.9614	0.026	0.001	1.64183e-61
B cell	BTBD11	4.72189e-66	-3.59059	0.019	0.166	1.72826e-61
B cell	RNF157	6.0718e-66	-3.74209	0.014	0.147	2.22234e-61
B cell	DPP4	6.8219e-66	-4.11886	0.01	0.147	2.49688e-61
B cell	SH2D1A	7.86231e-66	-3.70152	0.012	0.142	2.87768e-61
B cell	PTPRC	8.59082e-66	-0.582473	0.827	0.928	3.14433e-61
B cell	SHISAL2A	1.25021e-65	1.68342	0.197	0.081	4.57588e-61
B cell	CD28	1.50597e-65	-4.12859	0.01	0.137	5.51199e-61
B cell	RBM38	1.64398e-65	1.42901	0.265	0.136	6.01712e-61
B cell	LINC02576	1.78992e-65	2.59702	0.059	0.011	6.55127e-61
B cell	LINC01004	2.4382e-65	1.32912	0.278	0.155	8.92406e-61
B cell	SREBF2	2.73982e-65	1.02509	0.471	0.328	1.0028e-60
B cell	SELPLG	3.0937e-65	-2.83278	0.023	0.155	1.13233e-60
B cell	TYMS	3.378e-65	-4.37303	0.014	0.172	1.23638e-60
B cell	AP3M2	4.02919e-65	-2.64996	0.033	0.188	1.47472e-60
B cell	TCF4-AS1	5.3497e-65	3.4073	0.025	0.002	1.95804e-60
B cell	AC079089.1	5.70203e-65	7.09714	0.017	0	2.087e-60
B cell	PBX4	8.82337e-65	-3.50453	0.012	0.148	3.22944e-60
B cell	RPS27L	8.96021e-65	-1.16403	0.253	0.476	3.27953e-60
B cell	FOXO1	9.20391e-65	0.941603	0.493	0.344	3.36872e-60
B cell	SLAMF7	1.66806e-64	-2.14252	0.067	0.239	6.10526e-60
B cell	CTBP2	1.81361e-64	-2.76874	0.026	0.185	6.63801e-60
B cell	SAMSN1	2.0881e-64	-0.874474	0.197	0.424	7.64266e-60
B cell	VOPP1	2.58649e-64	1.03608	0.479	0.344	9.46682e-60
B cell	FAAH2	2.64151e-64	-2.93114	0.026	0.179	9.66821e-60
B cell	TFEB	2.76315e-64	1.6357	0.189	0.087	1.01134e-59
B cell	ROR1	2.7874e-64	4.50293	0.037	0.003	1.02022e-59
B cell	RGCC	2.84154e-64	-2.81143	0.03	0.177	1.04003e-59
B cell	TNFRSF25	3.07461e-64	-3.74704	0.014	0.148	1.12534e-59
B cell	WNT10A	4.26687e-64	2.85553	0.059	0.01	1.56172e-59
B cell	NDUFB2	4.46866e-64	-0.849866	0.377	0.6	1.63558e-59
B cell	C17orf49	6.81884e-64	-1.16944	0.195	0.412	2.49576e-59
B cell	PTPN6	7.31679e-64	1.37774	0.279	0.157	2.67802e-59
B cell	CLDND1	7.81177e-64	-1.71669	0.116	0.306	2.85919e-59
B cell	BTN2A2	1.16938e-63	2.17789	0.121	0.043	4.28003e-59
B cell	RASGRP2	1.23248e-63	1.77438	0.158	0.059	4.511e-59
B cell	GPX4	1.28034e-63	-1.08007	0.344	0.555	4.68616e-59
B cell	SH2D2A	1.71447e-63	-3.63021	0.016	0.154	6.27514e-59
B cell	SVIL	1.85154e-63	-3.61177	0.015	0.148	6.77683e-59
B cell	JUNB	2.1541e-63	-1.02729	0.219	0.445	7.88422e-59
B cell	GRB2	2.23286e-63	0.83106	0.571	0.426	8.17251e-59
B cell	SH3BGRL3	3.49726e-63	-0.646718	0.732	0.853	1.28003e-58
B cell	PSTPIP2	5.1391e-63	-3.53982	0.017	0.166	1.88096e-58
B cell	EEF1D	5.71752e-63	0.470601	0.888	0.84	2.09267e-58
B cell	MAF	6.49607e-63	-3.8695	0.01	0.134	2.37763e-58
B cell	CENPK	6.95717e-63	-2.24202	0.045	0.201	2.54639e-58
B cell	LINC00299	7.86729e-63	-5.65839	0.005	0.138	2.87951e-58
B cell	AC068193.1	8.26314e-63	2.45595	0.073	0.017	3.02439e-58
B cell	OR2T10	1.06001e-62	9.35337	0.012	0	3.87975e-58
B cell	AP002761.2	1.0741e-62	4.98417	0.017	0.001	3.93131e-58
B cell	TUT4	1.65901e-62	0.837651	0.542	0.4	6.07213e-58
B cell	EVL	2.11678e-62	-0.834509	0.429	0.64	7.74763e-58
B cell	HLA-C	2.18184e-62	-0.388716	0.954	0.977	7.98576e-58
B cell	AC092068.2	2.23995e-62	6.02956	0.014	0	8.19843e-58
B cell	ISG15	2.43061e-62	-0.559598	0.796	0.9	8.89629e-58
B cell	SMAD3	2.43879e-62	1.03835	0.426	0.281	8.92622e-58
B cell	LMO2	3.21823e-62	2.81909	0.069	0.019	1.1779e-57
B cell	AC018695.2	3.6847e-62	7.69673	0.015	0	1.34864e-57
B cell	ITM2A	3.78396e-62	-2.49867	0.035	0.175	1.38497e-57
B cell	CNN3	6.79325e-62	3.08389	0.042	0.007	2.4864e-57
B cell	COX6C	7.09991e-62	-0.768998	0.385	0.614	2.59864e-57
B cell	PCNX2	7.36174e-62	-1.5535	0.109	0.287	2.69447e-57
B cell	TMEM50A	7.69572e-62	-0.944599	0.254	0.485	2.81671e-57
B cell	NDUFB8	7.92421e-62	-0.834776	0.365	0.598	2.90034e-57
B cell	SYT9	1.64452e-61	3.70425	0.032	0.003	6.01909e-57
B cell	MT-CYB	2.03633e-61	0.57932	0.946	0.914	7.45317e-57
B cell	DIP2B	2.21737e-61	1.0746	0.411	0.275	8.1158e-57
B cell	AC245060.5	3.08726e-61	2.85161	0.057	0.013	1.12997e-56
B cell	CD99	3.77904e-61	-1.09267	0.227	0.452	1.38317e-56
B cell	OPRM1	4.11745e-61	-3.42297	0.017	0.147	1.50703e-56
B cell	ARL6IP5	5.15549e-61	-0.898048	0.329	0.566	1.88696e-56
B cell	CLIP4	5.32789e-61	-2.65952	0.028	0.162	1.95006e-56
B cell	SLC20A1	5.87826e-61	-1.98727	0.046	0.2	2.1515e-56
B cell	SNX22	7.03094e-61	3.26124	0.033	0.004	2.57339e-56
B cell	TRIM38	7.90056e-61	0.988962	0.42	0.285	2.89168e-56
B cell	A2M	8.88928e-61	-4.01884	0.01	0.139	3.25357e-56
B cell	PIP4K2A	8.98146e-61	-0.815013	0.368	0.596	3.28731e-56
B cell	IFI44L	1.24003e-60	0.629619	0.739	0.634	4.53864e-56
B cell	SCRN1	1.25793e-60	2.92883	0.06	0.013	4.60415e-56
B cell	NLRC3	1.41397e-60	-1.51742	0.106	0.288	5.17527e-56
B cell	TMEM241	1.46701e-60	1.97876	0.114	0.042	5.36939e-56
B cell	FNIP2	1.62149e-60	-4.64002	0.006	0.139	5.93481e-56
B cell	CLSPN	1.67707e-60	-4.29575	0.012	0.156	6.13825e-56
B cell	RELL1	1.7945e-60	-3.38837	0.012	0.137	6.56804e-56
B cell	AL031280.1	1.97729e-60	-3.84256	0.017	0.155	7.23707e-56
B cell	GLIPR2	2.40617e-60	-1.66348	0.097	0.283	8.80681e-56
B cell	SLA2	2.71867e-60	-3.69862	0.011	0.138	9.9506e-56
B cell	IGHV3-7	2.94917e-60	8.41264	0.013	0	1.07943e-55
B cell	EZH2	3.08157e-60	-2.82204	0.039	0.2	1.12789e-55
B cell	CCDC69	4.06016e-60	1.12972	0.347	0.218	1.48606e-55
B cell	KLRK1	4.36496e-60	-2.26724	0.051	0.217	1.59762e-55
B cell	IGHE	4.65276e-60	7.02451	0.017	0	1.70296e-55
B cell	TUBB	5.15484e-60	-1.20344	0.334	0.532	1.88672e-55
B cell	ADD2	5.38254e-60	3.05573	0.037	0.005	1.97006e-55
B cell	LIMS1	6.00137e-60	-1.5279	0.115	0.308	2.19656e-55
B cell	SSBP3	7.6355e-60	-2.27144	0.039	0.179	2.79467e-55
B cell	UQCRB	9.05167e-60	-0.677818	0.468	0.691	3.313e-55
B cell	FAM126A	9.23453e-60	1.5929	0.21	0.099	3.37993e-55
B cell	PXK	9.81699e-60	1.41382	0.229	0.124	3.59312e-55
B cell	TOX	1.55069e-59	-2.97805	0.031	0.174	5.67569e-55
B cell	PPA1	1.9148e-59	-1.15188	0.154	0.346	7.00835e-55
B cell	ZNF135	2.35142e-59	2.98294	0.041	0.007	8.60645e-55
B cell	FCER1G	3.46007e-59	-3.32266	0.035	0.201	1.26642e-54
B cell	HSH2D	5.41829e-59	0.98442	0.356	0.221	1.98315e-54
B cell	AL590807.1	5.63329e-59	4.4236	0.037	0.004	2.06184e-54
B cell	JPT1	9.09649e-59	-1.30344	0.133	0.325	3.32941e-54
B cell	AP3B1	1.33358e-58	0.968815	0.531	0.408	4.88103e-54
B cell	GUK1	1.89754e-58	-0.750411	0.392	0.619	6.94518e-54
B cell	CEBPB	1.9639e-58	-1.50312	0.122	0.318	7.18807e-54
B cell	ATP5MG	2.5988e-58	-0.632066	0.55	0.754	9.51187e-54
B cell	KDM4C	3.65971e-58	0.970216	0.49	0.356	1.33949e-53
B cell	IGHV3-15	3.69391e-58	9.99641	0.011	0	1.35201e-53
B cell	MGST3	7.88813e-58	-1.01437	0.191	0.402	2.88713e-53
B cell	RCBTB2	7.96828e-58	-2.36877	0.024	0.158	2.91647e-53
B cell	PRR5L	8.37991e-58	-3.14679	0.019	0.154	3.06713e-53
B cell	XACT	9.7509e-58	4.94183	0.024	0.001	3.56893e-53
B cell	GIMAP2	1.04089e-57	-1.71593	0.07	0.226	3.80977e-53
B cell	RRM2	1.09583e-57	-4.87892	0.013	0.158	4.01083e-53
B cell	LINC02446	1.22152e-57	-4.65408	0.01	0.14	4.47089e-53
B cell	COL4A4	1.36388e-57	3.04974	0.041	0.006	4.99194e-53
B cell	MT-CO3	1.48747e-57	0.402978	0.995	0.992	5.44431e-53
B cell	TBC1D2B	2.14632e-57	-1.84189	0.061	0.215	7.85575e-53
B cell	ATP1A1	2.45435e-57	-1.46756	0.089	0.258	8.98315e-53
B cell	TNFRSF18	2.61923e-57	-3.29366	0.032	0.184	9.58666e-53
B cell	FCGR2B	7.08161e-57	1.66634	0.102	0.047	2.59194e-52
B cell	TPI1	7.96844e-57	-1.13824	0.216	0.437	2.91653e-52
B cell	PPFIBP2	9.6531e-57	2.05764	0.123	0.044	3.53313e-52
B cell	SNX8	1.00496e-56	1.47194	0.178	0.094	3.67826e-52
B cell	ICOSLG	1.05178e-56	3.77179	0.03	0.003	3.84964e-52
B cell	VDAC3	1.07178e-56	-1.35656	0.106	0.284	3.92281e-52
B cell	PVT1	1.16929e-56	-1.61616	0.094	0.254	4.27973e-52
B cell	TNFSF8	1.89532e-56	-3.39071	0.014	0.135	6.93706e-52
B cell	CCDC32	2.49532e-56	1.26716	0.281	0.161	9.13313e-52
B cell	DUT	2.5613e-56	-1.60143	0.215	0.411	9.37462e-52
B cell	AL392172.2	3.03428e-56	5.93209	0.013	0	1.11058e-51
B cell	PCLAF	3.37829e-56	-3.2988	0.025	0.172	1.23649e-51
B cell	L3MBTL3	4.28853e-56	1.0921	0.253	0.143	1.56964e-51
B cell	CENPP	4.59572e-56	-1.86155	0.069	0.239	1.68208e-51
B cell	NINJ1	4.61181e-56	-3.37882	0.019	0.157	1.68797e-51
B cell	TBC1D4	4.97951e-56	-3.65983	0.012	0.131	1.82255e-51
B cell	LINC01215	5.60034e-56	1.73785	0.122	0.045	2.04978e-51
B cell	GPATCH11	5.94774e-56	1.40517	0.172	0.085	2.17693e-51
B cell	DIP2A	9.79425e-56	-1.64489	0.079	0.235	3.58479e-51
B cell	CECR2	1.05612e-55	4.10895	0.033	0.003	3.86552e-51
B cell	PLPP5	1.09436e-55	1.77085	0.153	0.063	4.00546e-51
B cell	PLEKHO1	1.27604e-55	0.567151	0.518	0.363	4.67045e-51
B cell	RPL19	1.33123e-55	0.270832	1	0.997	4.87244e-51
B cell	AIM2	1.49943e-55	1.94556	0.174	0.067	5.48805e-51
B cell	ZNRF1	1.85264e-55	-4.47081	0.008	0.128	6.78085e-51
B cell	MILR1	2.22209e-55	2.80917	0.062	0.018	8.13307e-51
B cell	TRGC1	2.88857e-55	-5.05898	0.006	0.124	1.05724e-50
B cell	CALM3	2.89658e-55	-1.04866	0.183	0.372	1.06018e-50
B cell	TMA7	4.13324e-55	-0.655865	0.455	0.678	1.51281e-50
B cell	FAM43A	4.43478e-55	3.12664	0.049	0.008	1.62318e-50
B cell	PAOX	4.6565e-55	2.18085	0.098	0.031	1.70432e-50
B cell	UBE2S	4.95748e-55	-1.54607	0.145	0.335	1.81449e-50
B cell	NAP1L4	8.2732e-55	-0.903632	0.316	0.531	3.02807e-50
B cell	RPS9	8.89989e-55	0.305468	0.997	0.988	3.25745e-50
B cell	IL6	1.11355e-54	3.70532	0.023	0.003	4.07572e-50
B cell	UNC93B1	1.3047e-54	1.51076	0.184	0.093	4.77532e-50
B cell	VAV2	1.35522e-54	2.50015	0.091	0.026	4.96025e-50
B cell	PIK3IP1	1.39268e-54	-1.35133	0.118	0.282	5.09737e-50
B cell	PSMA7	1.61616e-54	-0.526247	0.683	0.828	5.91531e-50
B cell	AC010260.1	1.91045e-54	-2.73953	0.024	0.148	6.99245e-50
B cell	ARHGAP17	2.21885e-54	1.28343	0.26	0.146	8.1212e-50
B cell	MKI67	2.34972e-54	-4.79007	0.01	0.145	8.60022e-50
B cell	KLRC3	2.66159e-54	-5.67847	0.003	0.121	9.7417e-50
B cell	AC068898.1	2.72816e-54	8.9311	0.01	0	9.98532e-50
B cell	IGHV4-39	2.72816e-54	9.65649	0.011	0	9.98535e-50
B cell	MPP7	3.03606e-54	-2.40363	0.035	0.17	1.11123e-49
B cell	IVNS1ABP	3.13993e-54	-1.37995	0.114	0.287	1.14925e-49
B cell	MAPKAPK3	4.58035e-54	-2.39284	0.029	0.158	1.67645e-49
B cell	CISD3	4.86566e-54	-1.79946	0.054	0.197	1.78088e-49
B cell	RNF213-AS1	6.12703e-54	-0.962368	0.284	0.495	2.24255e-49
B cell	TRBC2	6.14594e-54	-1.26443	0.272	0.476	2.24948e-49
B cell	SNX3	6.44591e-54	0.953458	0.449	0.327	2.35927e-49
B cell	AL121820.1	6.47317e-54	5.19418	0.015	0	2.36925e-49
B cell	L3HYPDH	7.04487e-54	1.63669	0.115	0.047	2.57849e-49
B cell	AGTPBP1	7.82007e-54	-1.25317	0.107	0.27	2.86222e-49
B cell	HTT	8.45597e-54	1.13636	0.366	0.234	3.09497e-49
B cell	GLYATL1B	8.75313e-54	6.84587	0.012	0	3.20373e-49
B cell	TCL1B	8.83729e-54	6.50305	0.012	0	3.23453e-49
B cell	SCIMP	1.06312e-53	1.65662	0.139	0.063	3.89114e-49
B cell	CHEK1	1.16034e-53	-3.91473	0.013	0.138	4.24696e-49
B cell	RMDN2	1.16997e-53	1.6536	0.116	0.052	4.28221e-49
B cell	EVA1C	1.67052e-53	-3.73389	0.011	0.127	6.11427e-49
B cell	SEPTIN6	2.26978e-53	0.828666	0.517	0.373	8.30763e-49
B cell	FCGR3A	2.43794e-53	-4.07733	0.007	0.123	8.92311e-49
B cell	BHLHE40	2.9399e-53	-1.3268	0.109	0.281	1.07603e-48
B cell	SFXN1	2.97466e-53	-1.5838	0.075	0.222	1.08876e-48
B cell	EIF4A1	3.06454e-53	-0.732739	0.415	0.618	1.12165e-48
B cell	BRIP1	3.3302e-53	-4.20132	0.011	0.135	1.21889e-48
B cell	MATK	5.22944e-53	-3.99817	0.007	0.123	1.91403e-48
B cell	IRF1	6.45325e-53	0.676527	0.788	0.717	2.36195e-48
B cell	FSTL4	1.20268e-52	5.78037	0.019	0.001	4.40194e-48
B cell	RFLNB	1.3669e-52	-4.07079	0.01	0.12	5.00298e-48
B cell	ZBTB20	1.52743e-52	0.583945	0.761	0.651	5.59055e-48
B cell	TMBIM6	1.59503e-52	-0.722042	0.429	0.636	5.83797e-48
B cell	INSL6	1.6787e-52	1.40777	0.163	0.084	6.1442e-48
B cell	AC027097.1	1.88767e-52	1.82695	0.101	0.038	6.90906e-48
B cell	MT-ND4	2.09672e-52	0.582702	0.891	0.852	7.6742e-48
B cell	DHRS3	2.32757e-52	-3.93368	0.01	0.118	8.51912e-48
B cell	IGF2R	2.89714e-52	-1.29466	0.125	0.301	1.06038e-47
B cell	CD58	2.93285e-52	-1.25693	0.133	0.312	1.07345e-47
B cell	EPS15	3.79729e-52	0.845865	0.51	0.389	1.38985e-47
B cell	SPCS3	4.31858e-52	-0.816468	0.297	0.509	1.58064e-47
B cell	SLC7A5	4.64948e-52	-1.6604	0.086	0.25	1.70175e-47
B cell	C9orf78	4.96776e-52	-1.0792	0.162	0.35	1.81825e-47
B cell	IFI27L1	5.32821e-52	-2.63667	0.025	0.15	1.95018e-47
B cell	MT-ND1	5.81084e-52	0.600551	0.873	0.835	2.12683e-47
B cell	POLR2L	6.71966e-52	-1.03422	0.172	0.351	2.45946e-47
B cell	AC004687.1	7.11773e-52	1.00921	0.412	0.273	2.60516e-47
B cell	AC106791.1	7.26621e-52	2.0138	0.089	0.028	2.65951e-47
B cell	AC079907.2	9.45853e-52	5.63958	0.015	0	3.46192e-47
B cell	PRKCA-AS1	1.11185e-51	-4.65727	0.005	0.109	4.06948e-47
B cell	LINC01340	1.54331e-51	3.08573	0.04	0.007	5.64867e-47
B cell	COX8A	2.2227e-51	-0.970462	0.259	0.461	8.13529e-47
B cell	SERF2	2.34572e-51	-0.500232	0.761	0.873	8.58559e-47
B cell	NRIP1	2.38408e-51	1.16338	0.266	0.167	8.72596e-47
B cell	CLCN6	2.73628e-51	1.55142	0.134	0.063	1.00151e-46
B cell	ERO1A	2.81344e-51	-1.38875	0.086	0.242	1.02975e-46
B cell	IGHV4-34	2.85779e-51	5.36525	0.015	0	1.04598e-46
B cell	DTX1	3.05013e-51	3.21437	0.025	0.003	1.11638e-46
B cell	BPTF	3.32167e-51	0.795193	0.559	0.439	1.21576e-46
B cell	LPIN2	3.76534e-51	-0.897415	0.27	0.472	1.37815e-46
B cell	RNASEK	4.30256e-51	-0.692097	0.506	0.691	1.57478e-46
B cell	CEP170	4.34615e-51	1.13155	0.239	0.14	1.59073e-46
B cell	CD8B	4.36501e-51	-4.34415	0.012	0.125	1.59764e-46
B cell	CTSH	5.04668e-51	0.635875	0.257	0.151	1.84713e-46
B cell	TLE5	6.89086e-51	-0.83963	0.314	0.519	2.52212e-46
B cell	ANKAR	6.93053e-51	1.39625	0.204	0.108	2.53664e-46
B cell	ZDHHC14	8.84676e-51	1.64363	0.21	0.111	3.238e-46
B cell	KLRC2	1.11336e-50	-6.31802	0.002	0.11	4.075e-46
B cell	RAP1B	1.69497e-50	-0.699652	0.438	0.659	6.20376e-46
B cell	AL138828.1	1.8282e-50	2.86602	0.041	0.007	6.69141e-46
B cell	ELOB	2.06663e-50	-0.761453	0.307	0.513	7.56406e-46
B cell	CCDC85B	2.17068e-50	-0.758685	0.355	0.566	7.94489e-46
B cell	MIF	2.50811e-50	-0.564468	0.589	0.77	9.17992e-46
B cell	NCAM1	2.59485e-50	-6.94487	0.002	0.116	9.49741e-46
B cell	ZC3H12D	3.36791e-50	1.17555	0.144	0.074	1.23269e-45
B cell	UBE2J1	3.50341e-50	1.29905	0.226	0.138	1.28228e-45
B cell	COL4A3	3.68495e-50	3.26842	0.03	0.004	1.34873e-45
B cell	IGHV1-18	4.38114e-50	9.45361	0.011	0	1.60354e-45
B cell	AL078459.1	4.65967e-50	3.15073	0.066	0.014	1.70549e-45
B cell	ARNTL	4.72814e-50	-1.503	0.075	0.217	1.73055e-45
B cell	BATF	4.91891e-50	-1.6871	0.078	0.231	1.80037e-45
B cell	H2AFY	5.10229e-50	-1.13618	0.165	0.357	1.86749e-45
B cell	OAS3	5.43171e-50	-0.973313	0.154	0.342	1.98806e-45
B cell	N4BP1	5.66795e-50	-0.800254	0.272	0.485	2.07452e-45
B cell	ST6GALNAC4	7.44007e-50	2.00044	0.086	0.026	2.72314e-45
B cell	PTPN7	8.0045e-50	-1.19989	0.108	0.264	2.92973e-45
B cell	TBC1D22A	1.24141e-49	0.76705	0.579	0.47	4.54368e-45
B cell	AGTRAP	1.37807e-49	-2.3128	0.024	0.146	5.04386e-45
B cell	DUSP16	1.4226e-49	-1.83758	0.058	0.191	5.20686e-45
B cell	ANXA5	1.5797e-49	-1.53114	0.14	0.322	5.78185e-45
B cell	BAX	1.65087e-49	-0.929094	0.286	0.494	6.04236e-45
B cell	TIMP3	1.65197e-49	4.3182	0.018	0.001	6.04637e-45
B cell	RIPOR1	1.73428e-49	2.03377	0.091	0.031	6.34762e-45
B cell	TNFRSF4	2.47894e-49	-3.76715	0.008	0.125	9.07317e-45
B cell	PLAAT4	3.03042e-49	-0.616913	0.421	0.645	1.10916e-44
B cell	TEP1	3.44143e-49	1.45725	0.167	0.083	1.2596e-44
B cell	ATAD2	3.60059e-49	-2.13788	0.077	0.241	1.31785e-44
B cell	MT1X	4.29304e-49	-2.40526	0.029	0.137	1.5713e-44
B cell	RAB5IF	4.61121e-49	-1.04169	0.196	0.386	1.68775e-44
B cell	LCP1	4.93368e-49	-0.6072	0.645	0.788	1.80578e-44
B cell	CD4	4.94178e-49	-3.84741	0.008	0.108	1.80874e-44
B cell	AC027288.3	5.30583e-49	4.514	0.015	0.001	1.94199e-44
B cell	TRGC2	6.34847e-49	-5.57827	0.005	0.108	2.3236e-44
B cell	RELB	6.52747e-49	-0.862223	0.221	0.411	2.38912e-44
B cell	UXS1	6.67687e-49	-1.67562	0.05	0.186	2.4438e-44
B cell	LINC02161	7.39829e-49	5.78313	0.015	0	2.70785e-44
B cell	AC027682.6	7.58998e-49	4.9121	0.016	0.001	2.77801e-44
B cell	ANXA2	8.12809e-49	-1.28215	0.162	0.348	2.97496e-44
B cell	BTG1	9.61636e-49	0.418543	0.902	0.832	3.51968e-44
B cell	DOCK5	1.14702e-48	-5.77146	0.003	0.113	4.19821e-44
B cell	FAR2	1.17218e-48	-2.10666	0.037	0.158	4.2903e-44
B cell	AP001341.1	1.26679e-48	4.75268	0.019	0.001	4.63656e-44
B cell	NDUFA1	1.28962e-48	-0.74506	0.315	0.519	4.72012e-44
B cell	DNMT1	1.41236e-48	-1.16444	0.165	0.35	5.16938e-44
B cell	LINC02391	1.44062e-48	2.21684	0.064	0.016	5.27281e-44
B cell	CABLES1	2.15464e-48	2.8891	0.053	0.012	7.88619e-44
B cell	TRANK1	2.23692e-48	0.789612	0.492	0.363	8.18737e-44
B cell	SLA	2.5489e-48	-1.49444	0.094	0.25	9.32923e-44
B cell	GRAMD1B	2.83576e-48	-3.25447	0.017	0.128	1.03792e-43
B cell	AC055854.1	3.18041e-48	5.47156	0.017	0.001	1.16406e-43
B cell	MMP25-AS1	3.5136e-48	-3.52842	0.01	0.114	1.28601e-43
B cell	TRIM44	3.5287e-48	0.930357	0.398	0.276	1.29154e-43
B cell	TPM4	3.77919e-48	-0.93336	0.304	0.505	1.38322e-43
B cell	TMEM258	5.10841e-48	-0.821014	0.231	0.431	1.86973e-43
B cell	IGLV3-21	5.55461e-48	9.96543	0.012	0	2.03304e-43
B cell	XCL2	5.77177e-48	-4.54626	0.01	0.125	2.11253e-43
B cell	RHEB	7.44376e-48	-0.961214	0.207	0.411	2.72449e-43
B cell	FRMD3	8.57689e-48	1.46338	0.144	0.068	3.13923e-43
B cell	P4HB	8.80085e-48	-1.20982	0.122	0.288	3.2212e-43
B cell	MTCL1	9.90753e-48	4.26367	0.02	0.002	3.62626e-43
B cell	AC092944.1	1.00532e-47	1.55246	0.14	0.063	3.67956e-43
B cell	EMP3	1.1173e-47	-0.502041	0.689	0.823	4.08942e-43
B cell	AL450267.1	1.16146e-47	9.19331	0.01	0	4.25107e-43
B cell	MARCH8	1.5418e-47	1.24057	0.228	0.127	5.64314e-43
B cell	DTL	1.58541e-47	-4.16209	0.01	0.122	5.80278e-43
B cell	NDUFA6	1.63255e-47	-1.09475	0.133	0.307	5.97528e-43
B cell	ETV6	1.98061e-47	0.616798	0.616	0.492	7.24923e-43
B cell	MED12L	2.51143e-47	2.09673	0.086	0.031	9.1921e-43
B cell	CERK	2.57749e-47	-1.65861	0.056	0.183	9.43386e-43
B cell	FANCI	2.61283e-47	-2.40828	0.035	0.163	9.56321e-43
B cell	CX3CR1	4.12288e-47	-5.12647	0.006	0.108	1.50902e-42
B cell	TENT5C	5.01535e-47	1.22311	0.201	0.109	1.83567e-42
B cell	PMEPA1	5.48361e-47	1.28004	0.187	0.097	2.00706e-42
B cell	MPEG1	6.10558e-47	0.852483	0.139	0.076	2.2347e-42
B cell	MBP	7.11695e-47	-0.732119	0.42	0.616	2.60487e-42
B cell	KDM4B	7.45956e-47	1.47034	0.18	0.087	2.73027e-42
B cell	ATP5MD	8.31654e-47	-0.745003	0.265	0.466	3.04394e-42
B cell	WWC3	8.6187e-47	1.30418	0.214	0.116	3.15453e-42
B cell	PDCD5	9.78141e-47	-0.848459	0.183	0.368	3.58009e-42
B cell	DIAPH3	9.80083e-47	-4.15281	0.009	0.124	3.5872e-42
B cell	SNHG26	1.02732e-46	1.82471	0.089	0.031	3.76011e-42
B cell	PTPRJ	1.45851e-46	-0.796579	0.241	0.434	5.33828e-42
B cell	BOLA3	1.51765e-46	-1.58678	0.052	0.175	5.55473e-42
B cell	CMTM3	1.75648e-46	-2.88998	0.015	0.111	6.42889e-42
B cell	SIGLEC5	1.80062e-46	3.18565	0.047	0.011	6.59045e-42
B cell	AL121935.1	1.81871e-46	2.23824	0.05	0.012	6.65666e-42
B cell	SEC61G	2.11431e-46	-0.938559	0.21	0.404	7.73859e-42
B cell	SUMO3	2.21023e-46	-1.00122	0.17	0.351	8.08966e-42
B cell	APMAP	2.2459e-46	-2.55438	0.024	0.138	8.22021e-42
B cell	AC009686.1	2.50505e-46	2.39709	0.035	0.008	9.16874e-42
B cell	CHD3	4.96244e-46	-1.32825	0.082	0.215	1.8163e-41
B cell	CTSZ	5.04402e-46	-0.28779	0.297	0.183	1.84616e-41
B cell	TMEM181	5.53351e-46	-1.51929	0.069	0.213	2.02532e-41
B cell	PPP2R5C	5.60854e-46	-0.793388	0.425	0.614	2.05278e-41
B cell	MT-ND2	5.90175e-46	0.565744	0.838	0.802	2.1601e-41
B cell	DENND5A	6.35881e-46	1.08313	0.277	0.182	2.32739e-41
B cell	PTGER4	6.44021e-46	-2.47206	0.027	0.138	2.35718e-41
B cell	AP001059.3	7.17021e-46	5.47906	0.01	0	2.62437e-41
B cell	FAM177A1	8.24323e-46	-1.06	0.119	0.275	3.0171e-41
B cell	CYLD	9.23024e-46	-0.731954	0.342	0.543	3.37836e-41
B cell	SKA2	1.03372e-45	-1.66402	0.066	0.2	3.78352e-41
B cell	TMEM268	1.05063e-45	1.80531	0.091	0.04	3.84541e-41
B cell	TCF3	1.07021e-45	1.62294	0.118	0.048	3.91707e-41
B cell	TPST2	1.10641e-45	-2.59455	0.023	0.133	4.04957e-41
B cell	CCDC167	1.50728e-45	-1.66705	0.06	0.193	5.51679e-41
B cell	NUSAP1	1.52128e-45	-3.32826	0.018	0.139	5.56804e-41
B cell	CEPT1	1.73463e-45	1.21102	0.213	0.119	6.3489e-41
B cell	AC010275.1	1.9909e-45	-3.61971	0.014	0.113	7.28688e-41
B cell	IGHV3-30	2.02139e-45	5.94036	0.01	0	7.3985e-41
B cell	IFT57	2.09331e-45	1.44339	0.142	0.067	7.66171e-41
B cell	ARHGEF3	2.17948e-45	-0.776804	0.337	0.531	7.97711e-41
B cell	STX11	2.28763e-45	-2.0173	0.041	0.168	8.37297e-41
B cell	CLLU1OS	2.33219e-45	3.42202	0.015	0.001	8.53605e-41
B cell	IDH2	2.4721e-45	-1.14343	0.171	0.355	9.04812e-41
B cell	KLRG1	3.18831e-45	-2.95575	0.015	0.116	1.16695e-40
B cell	OST4	3.84577e-45	-0.671712	0.352	0.549	1.40759e-40
B cell	AP2S1	3.95629e-45	-1.0404	0.181	0.363	1.44804e-40
B cell	CTSL	4.01033e-45	-4.30489	0.014	0.13	1.46782e-40
B cell	EML4	4.09083e-45	-0.650116	0.516	0.703	1.49728e-40
B cell	NTNG1	4.20026e-45	4.78341	0.019	0.001	1.53734e-40
B cell	SELENOS	4.64149e-45	-1.02384	0.138	0.31	1.69883e-40
B cell	TOP2A	5.82338e-45	-3.77898	0.014	0.131	2.13142e-40
B cell	HIPK1	6.57291e-45	-1.32056	0.078	0.211	2.40575e-40
B cell	LAG3	7.43231e-45	-4.21132	0.008	0.108	2.7203e-40
B cell	TNFRSF1A	7.73536e-45	-3.39694	0.009	0.102	2.83122e-40
B cell	DGKH	8.69476e-45	-2.2398	0.028	0.14	3.18237e-40
B cell	LINC00158	8.8444e-45	4.30879	0.016	0.001	3.23714e-40
B cell	MICOS10	1.09227e-44	-0.781309	0.247	0.442	3.99783e-40
B cell	GPR68	1.24419e-44	-2.72177	0.016	0.118	4.55386e-40
B cell	ELMO1	1.31212e-44	0.581649	0.688	0.601	4.80249e-40
B cell	UQCR11	1.32803e-44	-0.722841	0.305	0.507	4.86073e-40
B cell	PXN	1.468e-44	-3.67853	0.006	0.093	5.37303e-40
B cell	KCNC3	1.71905e-44	4.60161	0.022	0.001	6.29191e-40
B cell	EIF4E3	1.8501e-44	-1.24435	0.082	0.214	6.77154e-40
B cell	MB21D2	1.90167e-44	-4.62567	0.006	0.105	6.9603e-40
B cell	ARRB1	2.26287e-44	-4.70619	0.004	0.098	8.28232e-40
B cell	SELENOW	2.54149e-44	-1.11224	0.102	0.241	9.3021e-40
B cell	DNAH11	2.58746e-44	2.40576	0.034	0.008	9.47036e-40
B cell	SCML4	2.867e-44	-1.7642	0.066	0.192	1.04935e-39
B cell	SUN2	2.92651e-44	-1.26352	0.112	0.267	1.07113e-39
B cell	LINC01684	3.06654e-44	1.39859	0.191	0.098	1.12239e-39
B cell	EIF1	3.72208e-44	-0.367439	0.844	0.936	1.36232e-39
B cell	CCDC200	4.11914e-44	1.52113	0.125	0.064	1.50765e-39
B cell	PLEKHA1	4.19329e-44	-1.2793	0.075	0.206	1.53479e-39
B cell	FASLG	4.30425e-44	-4.55306	0.005	0.093	1.5754e-39
B cell	DIRAS1	4.37802e-44	6.55101	0.014	0	1.6024e-39
B cell	AC007368.1	4.42325e-44	6.24211	0.014	0	1.61896e-39
B cell	JAML	6.73925e-44	-4.92377	0.004	0.095	2.46663e-39
B cell	KRTCAP2	7.3251e-44	-0.782846	0.257	0.447	2.68106e-39
B cell	APBA2	7.40257e-44	-3.5746	0.011	0.103	2.70942e-39
B cell	HINT1	7.74522e-44	-0.452144	0.772	0.881	2.83483e-39
B cell	CD47	7.79922e-44	0.627033	0.623	0.536	2.85459e-39
B cell	AL136456.1	8.47223e-44	-4.1731	0.014	0.126	3.10092e-39
B cell	CCN2	8.94108e-44	9.1117	0.01	0	3.27253e-39
B cell	IGHV1-69D	8.94108e-44	9.50104	0.01	0	3.27253e-39
B cell	BNC2	9.01209e-44	-6.05211	0.003	0.102	3.29852e-39
B cell	DIAPH1	9.0507e-44	-0.83055	0.232	0.42	3.31265e-39
B cell	MS4A6E	9.25157e-44	6.6216	0.011	0	3.38617e-39
B cell	GALM	1.17872e-43	-1.90679	0.043	0.165	4.31424e-39
B cell	NDUFB7	1.21062e-43	-0.75395	0.252	0.442	4.43099e-39
B cell	EPB41	1.6244e-43	-0.735844	0.403	0.584	5.94548e-39
B cell	ZFAND6	1.80113e-43	0.839931	0.452	0.351	6.59231e-39
B cell	IGFBP4	1.85632e-43	2.58615	0.047	0.011	6.7943e-39
B cell	BBX	1.85948e-43	0.809232	0.505	0.389	6.8059e-39
B cell	AC015849.1	2.28951e-43	-3.72589	0.012	0.111	8.37985e-39
B cell	NBEA	2.49319e-43	1.76336	0.085	0.032	9.12534e-39
B cell	PKM	2.54448e-43	-0.925401	0.229	0.414	9.31304e-39
B cell	RASSF5	2.60817e-43	-1.03046	0.143	0.3	9.54615e-39
B cell	HNRNPLL	2.69882e-43	-2.54559	0.019	0.117	9.87794e-39
B cell	EBI3	2.77859e-43	2.5756	0.034	0.005	1.01699e-38
B cell	KIF2A	2.90966e-43	-0.71878	0.338	0.525	1.06496e-38
B cell	PPIB	2.99082e-43	-0.605305	0.437	0.637	1.09467e-38
B cell	ATXN7L1	3.10479e-43	-1.76186	0.053	0.171	1.13639e-38
B cell	HAVCR2	3.35113e-43	-2.89223	0.017	0.128	1.22655e-38
B cell	ADGRE5	3.60925e-43	-1.07531	0.12	0.277	1.32102e-38
B cell	LINC00665	3.72865e-43	2.53311	0.035	0.009	1.36472e-38
B cell	FIG4	5.76312e-43	1.56553	0.15	0.074	2.10936e-38
B cell	MANF	6.14379e-43	-0.918771	0.183	0.367	2.24869e-38
B cell	TMEM160	6.63518e-43	-0.897216	0.19	0.365	2.42854e-38
B cell	SAMD9L	6.84667e-43	0.58357	0.714	0.645	2.50595e-38
B cell	NSD2	8.19294e-43	-1.87124	0.065	0.209	2.9987e-38
B cell	LYAR	8.46569e-43	-1.57657	0.069	0.198	3.09853e-38
B cell	TNFRSF1B	8.88556e-43	-1.34517	0.082	0.217	3.2522e-38
B cell	NOTCH2	1.0745e-42	1.02941	0.283	0.189	3.9328e-38
B cell	NFATC3	1.1318e-42	0.946476	0.476	0.358	4.14249e-38
B cell	PLAAT3	1.30236e-42	-3.98827	0.007	0.1	4.76678e-38
B cell	UBL5	1.31368e-42	-0.645664	0.363	0.565	4.8082e-38
B cell	H2AFJ	1.41155e-42	-1.81661	0.044	0.168	5.16641e-38
B cell	ITGA5	1.44423e-42	-2.83717	0.015	0.115	5.28602e-38
B cell	H2AFZ	1.4889e-42	-1.0459	0.393	0.558	5.44952e-38
B cell	CORO2B	1.53391e-42	5.78668	0.014	0	5.61427e-38
B cell	ACAA2	1.54551e-42	-1.7232	0.04	0.158	5.65673e-38
B cell	UBASH3B	1.57738e-42	-2.4869	0.019	0.115	5.77335e-38
B cell	RUNX3	1.69684e-42	-0.733871	0.295	0.481	6.2106e-38
B cell	ADAMTS7	1.80691e-42	5.97467	0.015	0	6.61349e-38
B cell	RBL1	1.90139e-42	-1.5353	0.077	0.215	6.95926e-38
B cell	ITGA6	2.09579e-42	-2.34764	0.022	0.119	7.6708e-38
B cell	SH2B2	2.18962e-42	2.54262	0.052	0.014	8.01422e-38
B cell	RDX	2.2925e-42	-1.66568	0.069	0.2	8.39077e-38
B cell	GLUL	2.70214e-42	-3.19847	0.034	0.16	9.89009e-38
B cell	COX6B1	2.78107e-42	-0.595699	0.44	0.631	1.0179e-37
B cell	LAPTM5	3.11682e-42	0.505201	0.634	0.517	1.14079e-37
B cell	ZMYND11	3.36124e-42	-1.14734	0.095	0.231	1.23025e-37
B cell	ARPC2	3.9483e-42	-0.487527	0.683	0.823	1.44512e-37
B cell	RAB27A	3.96025e-42	-0.945886	0.169	0.334	1.44949e-37
B cell	AC012368.1	3.96198e-42	3.10468	0.032	0.004	1.45013e-37
B cell	TRIM14	4.11098e-42	-0.950922	0.154	0.317	1.50466e-37
B cell	ATP5F1E	4.60909e-42	-0.40704	0.782	0.891	1.68697e-37
B cell	SYCP3	4.667e-42	2.57203	0.046	0.011	1.70817e-37
B cell	AC010226.1	7.40108e-42	1.78436	0.084	0.032	2.70887e-37
B cell	NFATC2	9.20527e-42	-0.907918	0.246	0.423	3.36922e-37
B cell	CFL1	9.6152e-42	-0.571815	0.636	0.777	3.51926e-37
B cell	AC112196.1	1.00942e-41	5.71082	0.01	0	3.69459e-37
B cell	HAGH	1.03378e-41	-1.14267	0.082	0.225	3.78374e-37
B cell	FRMD4B	1.12079e-41	-4.69971	0.003	0.091	4.10222e-37
B cell	DTNBP1	1.80883e-41	1.02342	0.371	0.257	6.62051e-37
B cell	LY6E-DT	2.04778e-41	2.0431	0.06	0.018	7.49509e-37
B cell	DCTN3	2.268e-41	-1.08518	0.119	0.268	8.30109e-37
B cell	COX7A2	2.31701e-41	-0.646267	0.399	0.584	8.48047e-37
B cell	PRDM2	3.04525e-41	0.733819	0.481	0.381	1.11459e-36
B cell	SLCO5A1	4.06913e-41	2.25758	0.03	0.005	1.48934e-36
B cell	ARPC1B	4.59506e-41	-0.486831	0.624	0.767	1.68184e-36
B cell	MGAT3	4.6342e-41	5.30758	0.017	0.001	1.69616e-36
B cell	TNRC6C	4.80204e-41	-0.936678	0.144	0.296	1.7576e-36
B cell	P2RY8	4.84522e-41	0.578468	0.567	0.445	1.7734e-36
B cell	ACOT7	4.95704e-41	-3.22536	0.008	0.102	1.81433e-36
B cell	IL27RA	6.4622e-41	-1.23226	0.101	0.244	2.36523e-36
B cell	UBASH3A	6.79529e-41	-4.89235	0.003	0.086	2.48715e-36
B cell	PCNX1	7.3122e-41	-0.672453	0.31	0.508	2.67634e-36
B cell	TNRC6B	9.08206e-41	0.494173	0.737	0.632	3.32412e-36
B cell	DBI	9.31627e-41	-0.687785	0.465	0.64	3.40985e-36
B cell	NDUFA4	9.4e-41	-0.587121	0.468	0.658	3.44049e-36
B cell	COPS9	9.97547e-41	-0.819126	0.161	0.314	3.65112e-36
B cell	TFDP1	1.15379e-40	-1.78169	0.041	0.156	4.22299e-36
B cell	HSPA5	1.34185e-40	-0.907357	0.199	0.383	4.91131e-36
B cell	MCM6	1.40444e-40	-2.36954	0.03	0.136	5.1404e-36
B cell	CENPF	1.58697e-40	-4.38019	0.009	0.114	5.80847e-36
B cell	PRDM1	1.62025e-40	-2.00497	0.03	0.13	5.93028e-36
B cell	AC024560.5	1.63996e-40	1.28246	0.183	0.097	6.00241e-36
B cell	WDFY1	1.71758e-40	0.938729	0.385	0.279	6.2865e-36
B cell	ARHGDIA	1.75257e-40	-0.899014	0.16	0.32	6.41457e-36
B cell	CD55	2.08845e-40	0.89925	0.313	0.218	7.64395e-36
B cell	SNRPF	2.20379e-40	-0.746533	0.201	0.365	8.06608e-36
B cell	IFITM1	2.36313e-40	-0.614638	0.552	0.724	8.64928e-36
B cell	MZT2B	2.68469e-40	-0.715039	0.34	0.523	9.82624e-36
B cell	LRMDA	2.78177e-40	-4.68593	0.008	0.117	1.01816e-35
B cell	AHR	2.88841e-40	-1.69603	0.061	0.19	1.05719e-35
B cell	MRPL41	2.9266e-40	-0.7817	0.189	0.355	1.07117e-35
B cell	SAV1	2.99349e-40	1.64728	0.107	0.05	1.09565e-35
B cell	SMARCB1	3.05608e-40	1.40145	0.2	0.111	1.11855e-35
B cell	BIN2	3.18438e-40	-0.896049	0.187	0.357	1.16551e-35
B cell	PSTPIP1	3.4386e-40	-1.63004	0.051	0.167	1.25856e-35
B cell	AIF1	3.61208e-40	-2.89857	0.04	0.162	1.32206e-35
B cell	CENPU	4.02467e-40	-3.08411	0.015	0.118	1.47307e-35
B cell	BLVRA	4.0312e-40	-1.92366	0.035	0.139	1.47546e-35
B cell	DOP1B	4.18088e-40	1.37942	0.17	0.094	1.53024e-35
B cell	PLEKHA5	4.3467e-40	-3.70267	0.007	0.089	1.59094e-35
B cell	XRN1	5.31184e-40	0.55775	0.728	0.659	1.94419e-35
B cell	ARRB2	6.13139e-40	-1.57496	0.038	0.15	2.24415e-35
B cell	MACF1	6.14458e-40	-0.630912	0.413	0.609	2.24898e-35
B cell	HDAC4	6.84594e-40	-1.02295	0.134	0.281	2.50568e-35
B cell	CPD	8.05928e-40	-2.27575	0.025	0.127	2.94978e-35
B cell	AC061958.1	8.12851e-40	4.12145	0.019	0.001	2.97512e-35
B cell	SDCBP	9.48397e-40	-1.55683	0.124	0.28	3.47123e-35
B cell	TENT5A	9.51772e-40	1.63538	0.165	0.086	3.48358e-35
B cell	HIP1R	1.07601e-39	1.37047	0.116	0.05	3.9383e-35
B cell	ZNF112	1.82383e-39	3.88552	0.015	0.002	6.67538e-35
B cell	RASAL3	1.86419e-39	-1.11577	0.136	0.289	6.8231e-35
B cell	CPQ	1.94104e-39	-1.0731	0.091	0.224	7.1044e-35
B cell	OR2T11	2.02624e-39	6.19972	0.01	0	7.41623e-35
B cell	AP1S3	2.0682e-39	1.69529	0.13	0.058	7.56982e-35
B cell	RTN3	2.26294e-39	-1.21219	0.074	0.201	8.28258e-35
B cell	SLC43A2	2.2838e-39	1.46292	0.122	0.061	8.35895e-35
B cell	VAMP8	2.33075e-39	-0.744447	0.34	0.527	8.53078e-35
B cell	AC087500.1	2.44168e-39	1.85204	0.108	0.046	8.93681e-35
B cell	AL162253.2	2.74948e-39	1.25362	0.176	0.095	1.00634e-34
B cell	CHCHD2	4.0823e-39	-0.453709	0.68	0.817	1.49416e-34
B cell	CCR1	4.29921e-39	-4.42395	0.005	0.103	1.57355e-34
B cell	SOD1	4.94409e-39	-0.668287	0.369	0.564	1.80959e-34
B cell	SLC2A5	5.62456e-39	5.16307	0.012	0	2.05865e-34
B cell	MAZ	5.7527e-39	-1.65719	0.041	0.152	2.10555e-34
B cell	ATF7IP2	5.87208e-39	0.991749	0.281	0.184	2.14924e-34
B cell	TMEM245	6.12599e-39	-1.06749	0.111	0.251	2.24217e-34
B cell	MCM4	6.24304e-39	-2.67826	0.023	0.122	2.28501e-34
B cell	IRF4	6.32776e-39	1.50775	0.112	0.049	2.31602e-34
B cell	BCAT1	6.70022e-39	2.35183	0.057	0.017	2.45235e-34
B cell	UTP6	7.66211e-39	1.20797	0.22	0.136	2.80441e-34
B cell	HSPA8	7.68913e-39	-0.513936	0.565	0.728	2.8143e-34
B cell	EHMT1	7.75073e-39	0.877812	0.434	0.337	2.83684e-34
B cell	THEM4	7.86656e-39	-1.86705	0.038	0.134	2.87924e-34
B cell	NDUFC2	8.02421e-39	-0.711626	0.27	0.448	2.93694e-34
B cell	TNKS2-AS1	8.45701e-39	2.99109	0.026	0.004	3.09535e-34
B cell	NUP88	1.65973e-38	1.03034	0.239	0.156	6.07479e-34
B cell	FOSL2	1.66871e-38	-3.15418	0.01	0.097	6.10766e-34
B cell	LDLR	1.76316e-38	-1.30008	0.064	0.18	6.45335e-34
B cell	PTPRM	1.926e-38	-3.52712	0.008	0.091	7.04935e-34
B cell	PRKY	1.99081e-38	-0.997691	0.142	0.293	7.28657e-34
B cell	LINC01678	2.2154e-38	2.09193	0.067	0.024	8.10857e-34
B cell	ADCY9	2.25735e-38	-3.1436	0.01	0.09	8.26214e-34
B cell	RNF19A	2.3765e-38	0.748733	0.508	0.406	8.69822e-34
B cell	NCAPD3	2.55755e-38	-2.01495	0.039	0.153	9.36088e-34
B cell	ATP6V1B2	4.24667e-38	-2.29564	0.041	0.156	1.55432e-33
B cell	MZT2A	5.20271e-38	-1.05415	0.131	0.265	1.90424e-33
B cell	GMNN	5.89687e-38	-2.49048	0.021	0.114	2.15831e-33
B cell	TRAF1	6.33622e-38	-1.26911	0.093	0.212	2.31912e-33
B cell	KIAA0513	7.14389e-38	-3.78215	0.006	0.091	2.61473e-33
B cell	MVB12B	8.05308e-38	-1.80483	0.034	0.138	2.94751e-33
B cell	SSR4	1.09649e-37	-0.55257	0.463	0.647	4.01325e-33
B cell	DNAJC9	1.09727e-37	-1.31239	0.12	0.274	4.01612e-33
B cell	AL160254.1	1.11098e-37	6.15805	0.011	0	4.06631e-33
B cell	RFFL	1.32837e-37	-1.06268	0.104	0.23	4.86196e-33
B cell	SMC4	1.3862e-37	-1.68593	0.088	0.229	5.07362e-33
B cell	BASP1-AS1	1.57808e-37	4.77873	0.011	0.001	5.77594e-33
B cell	FMN1	1.62272e-37	-2.47648	0.018	0.12	5.93933e-33
B cell	NOL4L	1.66644e-37	-2.70845	0.015	0.098	6.09934e-33
B cell	SUB1	1.68854e-37	-0.404104	0.659	0.819	6.18023e-33
B cell	STAT5B	1.74398e-37	-0.982462	0.14	0.279	6.38314e-33
B cell	HELLS	1.74399e-37	-2.01855	0.047	0.165	6.38316e-33
B cell	CHD1	1.77318e-37	0.830033	0.442	0.339	6.49003e-33
B cell	ANKRD36C	1.8589e-37	-1.35911	0.078	0.195	6.80377e-33
B cell	UBE2T	1.89838e-37	-2.60452	0.021	0.123	6.94825e-33
B cell	AL360178.1	2.21003e-37	2.12884	0.046	0.013	8.08892e-33
B cell	SH3BGRL	2.5264e-37	0.737014	0.476	0.372	9.24686e-33
B cell	HS2ST1	2.60751e-37	1.1539	0.247	0.155	9.54373e-33
B cell	TEC	3.10688e-37	1.94013	0.08	0.031	1.13715e-32
B cell	FGFBP2	3.23983e-37	-5.51521	0.004	0.086	1.18581e-32
B cell	LRRC8C	3.28184e-37	-1.01862	0.122	0.259	1.20118e-32
B cell	SPATS2	3.29391e-37	1.21435	0.174	0.105	1.2056e-32
B cell	ST8SIA1	3.63399e-37	-3.62864	0.011	0.098	1.33008e-32
B cell	EPHA4	4.13339e-37	-2.1596	0.035	0.143	1.51286e-32
B cell	S1PR4	4.26249e-37	-1.01389	0.124	0.262	1.56012e-32
B cell	NR1H2	4.57745e-37	1.22531	0.17	0.098	1.67539e-32
B cell	MFHAS1	4.57884e-37	-1.11748	0.085	0.208	1.6759e-32
B cell	ODC1	5.41562e-37	1.07386	0.262	0.164	1.98217e-32
B cell	GATM	6.55632e-37	2.91847	0.032	0.006	2.39968e-32
B cell	PRELID1	6.64769e-37	-0.642814	0.431	0.598	2.43312e-32
B cell	ZHX2	6.88936e-37	0.800617	0.433	0.32	2.52157e-32
B cell	UBE2L6	6.92184e-37	0.736857	0.505	0.412	2.53346e-32
B cell	TPX2	8.50781e-37	-4.85186	0.004	0.091	3.11394e-32
B cell	PARP1	1.0172e-36	0.886893	0.368	0.265	3.72305e-32
B cell	NDUFA13	1.05432e-36	-0.597346	0.456	0.63	3.85891e-32
B cell	ATP5MC3	1.33875e-36	-0.627855	0.346	0.537	4.89997e-32
B cell	NIPA2	1.3675e-36	1.17698	0.238	0.145	5.00518e-32
B cell	LAMP1	2.013e-36	-1.09078	0.109	0.249	7.36777e-32
B cell	NDUFAB1	2.01587e-36	-0.654868	0.23	0.409	7.37828e-32
B cell	CST3	2.13381e-36	-3.62065	0.022	0.13	7.80994e-32
B cell	MLLT6	2.19429e-36	-0.95623	0.125	0.263	8.03133e-32
B cell	PARK7	2.3003e-36	-0.582046	0.433	0.615	8.41934e-32
B cell	KLF8	2.31933e-36	3.04933	0.028	0.005	8.48898e-32
B cell	AL357153.1	2.81382e-36	3.95278	0.015	0.001	1.02989e-31
B cell	LMAN2	3.08238e-36	-0.766675	0.192	0.361	1.12818e-31
B cell	ZNF367	3.11523e-36	-2.39389	0.023	0.116	1.14021e-31
B cell	SGTB	3.81946e-36	-1.73874	0.039	0.139	1.39796e-31
B cell	AL009177.1	3.91936e-36	2.50947	0.024	0.005	1.43453e-31
B cell	BCL2L11	4.02345e-36	1.48372	0.152	0.075	1.47262e-31
B cell	DLEU1	4.10852e-36	0.659689	0.408	0.308	1.50376e-31
B cell	CARD19	4.19201e-36	-1.54808	0.039	0.137	1.53432e-31
B cell	NDUFS8	4.20846e-36	-0.920737	0.138	0.291	1.54034e-31
B cell	TUBA1C	5.20916e-36	-1.2146	0.105	0.247	1.9066e-31
B cell	NFKBID	5.61505e-36	1.77944	0.124	0.057	2.05517e-31
B cell	PNISR	6.0407e-36	0.610298	0.552	0.462	2.21096e-31
B cell	ARHGDIB	6.13265e-36	-0.567283	0.468	0.644	2.24461e-31
B cell	NDUFS6	6.3236e-36	-0.711045	0.297	0.477	2.3145e-31
B cell	LINC00944	6.37092e-36	-2.36144	0.026	0.117	2.33182e-31
B cell	ANAPC11	6.45594e-36	-0.853099	0.167	0.336	2.36294e-31
B cell	MYO6	6.5904e-36	-3.27816	0.01	0.087	2.41215e-31
B cell	SRI	6.87809e-36	-0.792446	0.22	0.389	2.51745e-31
B cell	NCAPG2	6.88478e-36	-2.29852	0.026	0.125	2.5199e-31
B cell	CENPW	7.08766e-36	-2.9598	0.015	0.107	2.59415e-31
B cell	KLRC1	7.38541e-36	-4.8776	0.006	0.093	2.70313e-31
B cell	F2R	7.65728e-36	-5.52021	0.003	0.077	2.80264e-31
B cell	BICD1	8.11463e-36	1.1358	0.231	0.136	2.97004e-31
B cell	RAB4B	8.54666e-36	1.20007	0.192	0.113	3.12816e-31
B cell	ACTN4	8.76018e-36	-1.04378	0.113	0.254	3.20631e-31
B cell	AKAP6	8.91897e-36	2.74718	0.039	0.009	3.26443e-31
B cell	TRAF5	9.81838e-36	1.15902	0.223	0.133	3.59362e-31
B cell	MELK	1.05313e-35	-4.44251	0.004	0.087	3.85458e-31
B cell	IL6R	1.09422e-35	-3.21673	0.009	0.092	4.00497e-31
B cell	EVI2B	1.3329e-35	0.890826	0.325	0.225	4.87855e-31
B cell	AC104389.5	1.33391e-35	1.43222	0.103	0.049	4.88225e-31
B cell	SYNJ1	1.51194e-35	-2.02569	0.027	0.122	5.53384e-31
B cell	PTP4A2	1.55402e-35	-0.659116	0.321	0.51	5.68787e-31
B cell	AC068413.1	1.67778e-35	4.33086	0.015	0.001	6.14086e-31
B cell	UBC	1.81039e-35	-0.355352	0.795	0.894	6.6262e-31
B cell	ACTN1	1.92538e-35	-3.0567	0.008	0.086	7.04709e-31
B cell	SEC11C	1.94555e-35	-0.828628	0.18	0.334	7.1209e-31
B cell	ACBD3	2.35945e-35	1.03719	0.277	0.197	8.63581e-31
B cell	FBXO34	2.4065e-35	-0.924725	0.146	0.29	8.80805e-31
B cell	KLF12	2.61367e-35	-0.750131	0.305	0.475	9.56631e-31
B cell	PZP	2.93916e-35	-3.50486	0.01	0.089	1.07576e-30
B cell	PSMA6	3.00942e-35	-0.613268	0.39	0.568	1.10148e-30
B cell	RUNX2	3.18686e-35	-1.56713	0.064	0.183	1.16642e-30
B cell	GAS7	3.55552e-35	-1.77858	0.045	0.166	1.30136e-30
B cell	LIMA1	4.05965e-35	-2.77376	0.016	0.09	1.48587e-30
B cell	APOBEC3F	4.51236e-35	1.21347	0.136	0.081	1.65157e-30
B cell	CD300A	4.57781e-35	-4.7527	0.004	0.076	1.67552e-30
B cell	CD5	4.6314e-35	-2.33021	0.022	0.107	1.69514e-30
B cell	C4orf48	4.7058e-35	-1.10171	0.085	0.199	1.72237e-30
B cell	DMXL2	5.33956e-35	-3.70882	0.02	0.118	1.95433e-30
B cell	RRM1	5.41522e-35	-1.74407	0.044	0.147	1.98202e-30
B cell	DPP7	6.01052e-35	-0.882614	0.151	0.299	2.19991e-30
B cell	AMPD3	6.48687e-35	1.34854	0.111	0.058	2.37426e-30
B cell	MAD2L1	6.87636e-35	-2.59875	0.018	0.102	2.51682e-30
B cell	CCL3	7.06145e-35	-2.25591	0.072	0.197	2.58456e-30
B cell	TSEN54	7.07502e-35	-1.93199	0.03	0.119	2.58953e-30
B cell	AC243829.2	7.1931e-35	-5.30866	0.003	0.084	2.63275e-30
B cell	CDCA4	7.65793e-35	-1.84064	0.035	0.132	2.80288e-30
B cell	PLXDC2	8.43139e-35	-5.39914	0.004	0.103	3.08597e-30
B cell	MCM7	9.00959e-35	-1.85337	0.041	0.153	3.2976e-30
B cell	ANP32E	9.95766e-35	-1.08425	0.158	0.305	3.6446e-30
B cell	TBCD	1.11801e-34	-1.30639	0.074	0.191	4.09202e-30
B cell	AL133453.1	1.24387e-34	-1.61019	0.044	0.144	4.5527e-30
B cell	TENT4A	1.26348e-34	1.20026	0.2	0.122	4.62447e-30
B cell	AP001628.1	1.31373e-34	2.3352	0.039	0.01	4.80837e-30
B cell	HIP1	1.55204e-34	-2.16396	0.024	0.124	5.68063e-30
B cell	MIR600HG	1.57316e-34	4.63768	0.012	0.001	5.75791e-30
B cell	TACC3	1.60579e-34	-1.71541	0.042	0.14	5.87736e-30
B cell	MARCKS	1.65786e-34	0.185582	0.141	0.089	6.06793e-30
B cell	UQCRQ	1.67117e-34	-0.840047	0.167	0.316	6.11667e-30
B cell	OLFML1	1.67302e-34	3.95968	0.018	0.001	6.12342e-30
B cell	MRPL57	1.68459e-34	-0.76276	0.192	0.35	6.16576e-30
B cell	STK38	1.80532e-34	-0.819168	0.194	0.343	6.60764e-30
B cell	AL365272.1	2.60469e-34	1.611	0.055	0.021	9.53343e-30
B cell	UBE2Q2	2.60621e-34	-1.08866	0.098	0.223	9.539e-30
B cell	MDFIC	2.6969e-34	-0.729954	0.244	0.412	9.87091e-30
B cell	NT5E	2.87418e-34	2.48246	0.033	0.008	1.05198e-29
B cell	RASSF2	2.97451e-34	1.29562	0.189	0.106	1.0887e-29
B cell	SLC39A8	3.30029e-34	-1.04674	0.088	0.207	1.20794e-29
B cell	PEAK1	3.57338e-34	1.19328	0.231	0.154	1.30789e-29
B cell	PPP1R14B	4.16415e-34	-0.754112	0.203	0.367	1.52412e-29
B cell	ANK2	4.5592e-34	3.78338	0.023	0.003	1.66871e-29
B cell	KDELR2	4.64206e-34	-1.03088	0.085	0.205	1.69904e-29
B cell	STAT6	4.96829e-34	1.00844	0.254	0.166	1.81844e-29
B cell	RRBP1	5.05673e-34	-1.50574	0.043	0.141	1.85081e-29
B cell	TSPO	5.46748e-34	-0.816388	0.263	0.426	2.00115e-29
B cell	CAB39	6.18104e-34	-0.702846	0.228	0.387	2.26232e-29
B cell	CLIC5	6.22798e-34	-2.27311	0.021	0.114	2.2795e-29
B cell	PATL2	7.43836e-34	0.982983	0.216	0.126	2.72251e-29
B cell	NDUFA3	7.55187e-34	-0.824503	0.183	0.342	2.76406e-29
B cell	LINC00243	7.61716e-34	-2.84369	0.012	0.08	2.78796e-29
B cell	LINC02201	8.04405e-34	4.71272	0.01	0.001	2.9442e-29
B cell	RGL4	8.15622e-34	-2.67312	0.014	0.093	2.98526e-29
B cell	IL4I1	9.99938e-34	-2.6571	0.035	0.141	3.65987e-29
B cell	DENND2D	1.01669e-33	-1.26617	0.064	0.175	3.7212e-29
B cell	GMDS-DT	1.02296e-33	0.925072	0.345	0.248	3.74412e-29
B cell	SMYD3	1.03851e-33	-0.572164	0.299	0.47	3.80104e-29
B cell	DHRS7	1.20265e-33	-0.904811	0.12	0.248	4.40181e-29
B cell	WDR76	1.3768e-33	-2.10449	0.03	0.125	5.03924e-29
B cell	PLEKHF1	1.5557e-33	-2.1288	0.025	0.115	5.69401e-29
B cell	WDR1	1.62937e-33	-0.848603	0.14	0.278	5.96367e-29
B cell	GALNT11	1.69037e-33	-1.30024	0.066	0.175	6.18691e-29
B cell	MAST3	1.76556e-33	1.48323	0.138	0.065	6.46211e-29
B cell	ATP5MPL	1.83267e-33	-0.653625	0.266	0.435	6.70775e-29
B cell	DOCK3	2.1978e-33	-4.38865	0.005	0.081	8.04415e-29
B cell	SIVA1	2.25372e-33	-0.904174	0.23	0.39	8.24885e-29
B cell	IL6ST	2.27631e-33	-1.11874	0.124	0.266	8.33153e-29
B cell	AFAP1	2.46564e-33	-3.82772	0.006	0.077	9.02448e-29
B cell	PHPT1	2.46714e-33	-0.763648	0.208	0.37	9.02999e-29
B cell	MMP9	2.48653e-33	-5.21171	0.009	0.104	9.10095e-29
B cell	EIF2AK3	2.64795e-33	1.15493	0.161	0.098	9.69175e-29
B cell	MXRA7	2.84431e-33	-2.66016	0.017	0.097	1.04105e-28
B cell	PIK3R1	2.90525e-33	-0.726148	0.225	0.375	1.06335e-28
B cell	SEM1	2.98973e-33	-0.610703	0.299	0.478	1.09427e-28
B cell	ABHD17A	3.0774e-33	-1.0746	0.117	0.247	1.12636e-28
B cell	AGAP1	3.52026e-33	-4.31082	0.005	0.075	1.28845e-28
B cell	NUBPL	3.79977e-33	1.38233	0.187	0.108	1.39075e-28
B cell	VDAC1	4.09248e-33	-0.767171	0.204	0.372	1.49789e-28
B cell	SETD2	4.10013e-33	0.698772	0.481	0.394	1.50069e-28
B cell	STAT2	4.2802e-33	0.658444	0.481	0.402	1.5666e-28
B cell	IGSF6	4.36159e-33	-3.23706	0.031	0.134	1.59638e-28
B cell	PLA2G7	4.52024e-33	-3.91206	0.017	0.115	1.65445e-28
B cell	AC092546.1	4.82896e-33	5.01676	0.01	0	1.76745e-28
B cell	NUDT1	4.99191e-33	-1.08198	0.118	0.258	1.82709e-28
B cell	ARHGAP31	4.99709e-33	-1.27315	0.073	0.194	1.82898e-28
B cell	ABHD2	5.43621e-33	-1.48787	0.053	0.163	1.98971e-28
B cell	CNOT6L	5.99168e-33	-0.686257	0.287	0.455	2.19302e-28
B cell	UQCR10	6.41605e-33	-0.621657	0.323	0.497	2.34834e-28
B cell	RPL29	6.49502e-33	0.258425	0.99	0.975	2.37724e-28
B cell	MTFP1	7.40891e-33	-1.76295	0.034	0.123	2.71174e-28
B cell	HNRNPAB	7.42946e-33	-0.79068	0.19	0.344	2.71926e-28
B cell	SVIP	7.65135e-33	-1.01094	0.106	0.235	2.80047e-28
B cell	ZNF791	7.77326e-33	1.11341	0.2	0.12	2.84509e-28
B cell	SHOC2	8.18864e-33	0.876299	0.327	0.243	2.99712e-28
B cell	E2F1	8.20993e-33	-4.70419	0.005	0.081	3.00492e-28
B cell	CDYL2	9.58599e-33	-3.17587	0.013	0.086	3.50857e-28
B cell	MICOS13	9.69753e-33	-0.741634	0.181	0.331	3.54939e-28
B cell	LRCH1	1.04953e-32	0.843026	0.351	0.262	3.8414e-28
B cell	MICAL2	1.08443e-32	-4.46697	0.003	0.071	3.96912e-28
B cell	SLC6A6	1.09676e-32	-1.26208	0.071	0.184	4.01426e-28
B cell	CLTB	1.097e-32	-1.14496	0.084	0.204	4.01512e-28
B cell	E2F3	1.11575e-32	-0.78533	0.156	0.295	4.08375e-28
B cell	AGPAT5	1.12315e-32	1.35921	0.198	0.12	4.11083e-28
B cell	DENND4A	1.17413e-32	0.757964	0.457	0.357	4.29743e-28
B cell	ASAP1	1.45913e-32	-0.853378	0.272	0.428	5.34055e-28
B cell	SEPTIN11	1.46798e-32	-1.3458	0.058	0.163	5.37296e-28
B cell	LINC00886	1.49855e-32	1.39984	0.109	0.048	5.48484e-28
B cell	AC096711.2	1.5874e-32	4.05672	0.019	0.002	5.81003e-28
B cell	CDKN2C	1.65484e-32	-6.27105	0.001	0.073	6.05689e-28
B cell	LILRB4	1.78322e-32	-4.68511	0.005	0.092	6.52677e-28
B cell	ZYX	1.82805e-32	-2.1735	0.021	0.1	6.69083e-28
B cell	CTSS	1.85556e-32	-0.137816	0.534	0.405	6.79153e-28
B cell	ZBTB18	1.8904e-32	1.61414	0.084	0.035	6.91906e-28
B cell	MRPS6	2.17971e-32	-0.90736	0.147	0.288	7.97795e-28
B cell	ANKRD22	2.30707e-32	-4.96414	0.003	0.086	8.44411e-28
B cell	LINC00996	2.63518e-32	-4.49223	0.005	0.08	9.64503e-28
B cell	C17orf99	2.67938e-32	3.67003	0.016	0.001	9.80679e-28
B cell	RHBDF2	2.78945e-32	1.21502	0.185	0.117	1.02097e-27
B cell	LYSMD2	2.92278e-32	0.822433	0.355	0.271	1.06977e-27
B cell	STS	2.98035e-32	1.84439	0.067	0.027	1.09084e-27
B cell	GABARAPL1	3.11729e-32	-2.52346	0.014	0.087	1.14096e-27
B cell	ESCO2	3.18814e-32	-4.04693	0.005	0.081	1.16689e-27
B cell	CLEC10A	3.29237e-32	-4.95446	0.004	0.091	1.20504e-27
B cell	NFATC1	3.37258e-32	1.37335	0.132	0.062	1.2344e-27
B cell	SLK	3.57477e-32	-1.21895	0.065	0.173	1.3084e-27
B cell	TMEM106C	3.6871e-32	-2.73402	0.018	0.104	1.34952e-27
B cell	PPT1	3.90934e-32	-1.39727	0.057	0.17	1.43086e-27
B cell	THYN1	4.01328e-32	-1.60527	0.04	0.13	1.4689e-27
B cell	HERC6	4.04313e-32	-0.692518	0.267	0.424	1.47983e-27
B cell	TBXAS1	4.33472e-32	-2.01983	0.023	0.105	1.58655e-27
B cell	MIOS	4.4089e-32	1.29882	0.161	0.087	1.6137e-27
B cell	ASF1B	4.56452e-32	-3.57987	0.006	0.081	1.67066e-27
B cell	USP15	4.82836e-32	0.430931	0.775	0.73	1.76723e-27
B cell	ATP8B4	5.03151e-32	-4.16986	0.006	0.085	1.84158e-27
B cell	FAM81A	6.48391e-32	2.94832	0.027	0.005	2.37318e-27
B cell	CLIP1	7.07501e-32	-0.695258	0.181	0.327	2.58952e-27
B cell	CCR7	7.13696e-32	0.499815	0.344	0.247	2.6122e-27
B cell	ABI1	7.21257e-32	0.687937	0.429	0.349	2.63987e-27
B cell	CENPM	7.32846e-32	-2.44494	0.023	0.124	2.68229e-27
B cell	JAKMIP2	7.35937e-32	-1.43981	0.046	0.138	2.6936e-27
B cell	AC073072.1	7.51088e-32	5.70063	0.01	0	2.74906e-27
B cell	AC023906.4	8.15364e-32	2.02566	0.062	0.019	2.98431e-27
B cell	RPL18	9.03311e-32	0.218581	0.999	0.994	3.30621e-27
B cell	ITM2C	9.04694e-32	1.56146	0.073	0.031	3.31127e-27
B cell	RCAN3	9.21182e-32	-1.04724	0.122	0.25	3.37162e-27
B cell	TCF19	9.23238e-32	-3.25683	0.01	0.089	3.37914e-27
B cell	FPR3	9.43591e-32	-4.06045	0.007	0.094	3.45364e-27
B cell	NANS	1.04949e-31	-1.39567	0.064	0.186	3.84125e-27
B cell	DOP1A	1.10318e-31	0.875554	0.261	0.184	4.03773e-27
B cell	ZBED5	1.1442e-31	1.2099	0.18	0.099	4.18789e-27
B cell	DAPK1	1.20401e-31	-4.04562	0.006	0.09	4.4068e-27
B cell	ATP5MF	1.28157e-31	-0.672129	0.26	0.427	4.69068e-27
B cell	AHRR	1.29475e-31	-3.25027	0.008	0.088	4.73892e-27
B cell	SNHG22	1.29561e-31	-2.43339	0.018	0.092	4.74207e-27
B cell	KCNAB2	1.34368e-31	-0.775474	0.135	0.264	4.91801e-27
B cell	SLC8A1	1.39968e-31	-4.75441	0.006	0.092	5.12295e-27
B cell	PA2G4	1.44437e-31	-0.787041	0.214	0.381	5.28653e-27
B cell	SECISBP2L	1.57722e-31	1.16934	0.23	0.144	5.77279e-27
B cell	GNPTAB	1.6393e-31	-0.881431	0.191	0.348	6.00001e-27
B cell	ANXA11	1.69374e-31	-0.809226	0.16	0.3	6.19925e-27
B cell	PTEN	1.7244e-31	0.887535	0.4	0.315	6.31146e-27
B cell	COMMD4	1.77509e-31	-1.0964	0.089	0.211	6.497e-27
B cell	TESK2	1.87846e-31	1.20019	0.12	0.07	6.87536e-27
B cell	GLS	1.99712e-31	0.529191	0.636	0.574	7.30968e-27
B cell	RAPGEF1	2.05056e-31	-0.644805	0.362	0.528	7.50525e-27
B cell	RABEP1	2.0767e-31	0.833575	0.383	0.295	7.60094e-27
B cell	CSNK1G3	2.28983e-31	0.815934	0.276	0.192	8.38099e-27
B cell	EBP	2.63163e-31	-1.29245	0.111	0.244	9.63204e-27
B cell	NDRG1	2.71151e-31	-1.59482	0.04	0.137	9.92438e-27
B cell	FBXW11	2.83655e-31	0.820161	0.346	0.253	1.03821e-26
B cell	RNF168	2.93656e-31	-0.957942	0.137	0.271	1.07481e-26
B cell	ANO6	2.97455e-31	-0.958385	0.082	0.203	1.08872e-26
B cell	PLAUR	3.17433e-31	-3.53339	0.005	0.083	1.16184e-26
B cell	CUTA	3.20739e-31	-0.722833	0.223	0.381	1.17394e-26
B cell	ABHD12	3.29426e-31	-1.50582	0.058	0.169	1.20573e-26
B cell	CRELD2	3.33712e-31	-1.34323	0.062	0.175	1.22142e-26
B cell	JOSD2	3.36242e-31	-1.09218	0.068	0.171	1.23068e-26
B cell	DGKZ	3.8192e-31	-1.09407	0.073	0.176	1.39787e-26
B cell	SARAF	3.83009e-31	-0.622497	0.468	0.646	1.40185e-26
B cell	LINC00342	3.94687e-31	-1.25293	0.075	0.178	1.44459e-26
B cell	RGL1	4.07645e-31	-3.47884	0.014	0.108	1.49202e-26
B cell	ETHE1	4.09671e-31	-1.4254	0.054	0.15	1.49944e-26
B cell	HERC5	4.53284e-31	-0.74763	0.249	0.421	1.65906e-26
B cell	ATP5PD	4.87006e-31	-0.659008	0.231	0.391	1.78249e-26
B cell	PCED1B	4.94246e-31	-0.724811	0.342	0.5	1.80899e-26
B cell	SFI1	5.05169e-31	-1.0843	0.089	0.195	1.84897e-26
B cell	VKORC1	5.1458e-31	-1.17712	0.06	0.162	1.88341e-26
B cell	C15orf48	5.60093e-31	-3.26313	0.032	0.133	2.05e-26
B cell	CREG1	5.67748e-31	-2.5372	0.018	0.108	2.07802e-26
B cell	PRKX	6.27254e-31	-0.882768	0.158	0.295	2.29581e-26
B cell	AC103876.1	6.42069e-31	-3.9334	0.005	0.073	2.35004e-26
B cell	MCTP2	6.75302e-31	0.483378	0.362	0.27	2.47167e-26
B cell	TMED8	7.1486e-31	1.36496	0.127	0.068	2.61646e-26
B cell	YWHAH	7.51917e-31	-1.02096	0.105	0.235	2.75209e-26
B cell	OSBPL5	8.28502e-31	-4.46173	0.003	0.067	3.0324e-26
B cell	ZNF586	8.45813e-31	1.21108	0.154	0.087	3.09576e-26
B cell	FEN1	8.65302e-31	-2.04236	0.032	0.122	3.16709e-26
B cell	IL17RA	8.6826e-31	-1.22885	0.075	0.195	3.17792e-26
B cell	PGP	8.7046e-31	-0.968154	0.104	0.233	3.18597e-26
B cell	HSP90AA1	9.14136e-31	-0.370225	0.696	0.814	3.34583e-26
B cell	DENND1A	9.19186e-31	0.917646	0.322	0.238	3.36431e-26
B cell	LRRN3	9.65572e-31	-2.07247	0.048	0.148	3.53409e-26
B cell	BIRC5	9.91752e-31	-4.9182	0.005	0.076	3.62991e-26
B cell	LCN10	1.15445e-30	5.11726	0.01	0	4.2254e-26
B cell	AC011933.4	1.16282e-30	0.917667	0.239	0.165	4.25604e-26
B cell	POLQ	1.20145e-30	-3.4222	0.007	0.078	4.39743e-26
B cell	PTPN12	1.28525e-30	-1.2943	0.083	0.206	4.70414e-26
B cell	MRPS33	1.32938e-30	-0.837747	0.142	0.271	4.86566e-26
B cell	TESC	1.35807e-30	-2.9011	0.012	0.091	4.97068e-26
B cell	MIAT	1.52753e-30	-2.97757	0.013	0.087	5.5909e-26
B cell	TANC2	1.54223e-30	-1.15747	0.049	0.138	5.64472e-26
B cell	ABCF1	1.58702e-30	-0.76869	0.156	0.289	5.80864e-26
B cell	COMTD1	1.66138e-30	-2.26263	0.023	0.109	6.08082e-26
B cell	RMI2	1.69228e-30	1.20292	0.127	0.078	6.19392e-26
B cell	TFRC	1.93814e-30	-1.35372	0.054	0.159	7.09378e-26
B cell	LRPAP1	1.94786e-30	-0.870218	0.171	0.313	7.12938e-26
B cell	MAPRE2	1.98152e-30	0.988678	0.248	0.166	7.25257e-26
B cell	ABCD2	2.03301e-30	-2.78448	0.009	0.07	7.44101e-26
B cell	PTMS	2.03406e-30	-2.02934	0.032	0.115	7.44486e-26
B cell	LONRF1	2.20869e-30	1.34477	0.112	0.062	8.08402e-26
B cell	ALDH5A1	2.29589e-30	1.75409	0.048	0.017	8.40319e-26
B cell	GZMK	2.30387e-30	-4.32111	0.006	0.079	8.43238e-26
B cell	LY75	2.39748e-30	0.908187	0.256	0.165	8.77501e-26
B cell	SPC25	2.48432e-30	-4.06238	0.006	0.075	9.09286e-26
B cell	ASPM	2.70335e-30	-3.90288	0.006	0.081	9.89453e-26
B cell	LINC00173	2.84284e-30	2.94156	0.021	0.003	1.04051e-25
B cell	ZNF667-AS1	2.86473e-30	2.10556	0.035	0.009	1.04852e-25
B cell	ATP2A1	2.91307e-30	2.14051	0.039	0.01	1.06621e-25
B cell	FGD3	2.9752e-30	-0.82698	0.166	0.302	1.08895e-25
B cell	CMPK2	3.30714e-30	-0.664671	0.18	0.325	1.21045e-25
B cell	ARPC5	3.56298e-30	-0.492668	0.543	0.691	1.30409e-25
B cell	ZWINT	3.72878e-30	-3.56036	0.009	0.079	1.36477e-25
B cell	RGS9	3.84531e-30	-2.57387	0.015	0.088	1.40742e-25
B cell	MPHOSPH9	3.92293e-30	-1.05867	0.096	0.218	1.43583e-25
B cell	CNIH4	4.02989e-30	-1.01748	0.074	0.174	1.47498e-25
B cell	C1orf162	4.2057e-30	1.26899	0.176	0.106	1.53933e-25
B cell	EOMES	4.23656e-30	-4.19426	0.005	0.069	1.55063e-25
B cell	PRKCI	4.40334e-30	-1.87124	0.026	0.104	1.61167e-25
B cell	EPB41L3	4.40538e-30	-4.53092	0.004	0.085	1.61241e-25
B cell	IL10RA	5.22496e-30	-0.832906	0.16	0.296	1.91239e-25
B cell	CDK1	5.75781e-30	-4.08667	0.007	0.077	2.10742e-25
B cell	MGAT1	5.7666e-30	-1.11494	0.082	0.199	2.11063e-25
B cell	IGFBP7	5.94498e-30	-3.82563	0.005	0.079	2.17592e-25
B cell	TRIM5	6.04735e-30	0.572931	0.436	0.345	2.21339e-25
B cell	FAU	6.33694e-30	0.231647	0.995	0.985	2.31938e-25
B cell	SLC38A1	6.4566e-30	0.460918	0.634	0.534	2.36318e-25
B cell	PRNP	6.50796e-30	-1.35987	0.05	0.149	2.38198e-25
B cell	ADGRG1	6.59002e-30	-4.68443	0.003	0.064	2.41201e-25
B cell	BTG3	7.20584e-30	-1.41846	0.041	0.141	2.63741e-25
B cell	FLOT1	7.44248e-30	-1.08278	0.093	0.223	2.72402e-25
B cell	ITGAM	7.89672e-30	-2.74864	0.01	0.079	2.89028e-25
B cell	ALAS1	8.35276e-30	-1.8375	0.037	0.129	3.05719e-25
B cell	ATG4C	9.06932e-30	1.1529	0.104	0.059	3.31946e-25
B cell	NCR3	9.3838e-30	-1.59505	0.073	0.185	3.43456e-25
B cell	TBC1D31	9.81194e-30	-1.85243	0.028	0.109	3.59127e-25
B cell	CASC4	1.19652e-29	0.959582	0.261	0.186	4.37937e-25
B cell	LGALS2	1.20353e-29	-3.06794	0.017	0.106	4.40503e-25
B cell	ZFP82	1.29902e-29	1.29979	0.084	0.039	4.75454e-25
B cell	GSAP	1.34484e-29	0.825353	0.219	0.153	4.92224e-25
B cell	CSTB	1.40013e-29	-0.871553	0.388	0.54	5.12463e-25
B cell	BRI3	1.69231e-29	-0.974838	0.271	0.419	6.19403e-25
B cell	SLC1A5	1.71313e-29	-1.8119	0.03	0.114	6.27023e-25
B cell	AC097634.1	1.79717e-29	3.0771	0.021	0.003	6.57781e-25
B cell	ASPHD2	1.8265e-29	1.99331	0.058	0.022	6.68515e-25
B cell	CLEC4E	1.97541e-29	-5.1728	0.003	0.077	7.2302e-25
B cell	AC022146.2	2.02724e-29	1.61883	0.097	0.044	7.41992e-25
B cell	LMNA	2.33046e-29	-2.5558	0.016	0.099	8.52973e-25
B cell	HOMER2	2.34853e-29	2.08588	0.063	0.022	8.59584e-25
B cell	TNFAIP2	2.48031e-29	-5.74527	0.001	0.072	9.07817e-25
B cell	IDI1	2.57212e-29	0.734839	0.433	0.348	9.41423e-25
B cell	GNPDA1	2.64055e-29	-1.28099	0.057	0.15	9.66469e-25
B cell	UBE2C	2.81767e-29	-3.93702	0.006	0.081	1.03129e-24
B cell	APRT	2.95964e-29	-0.494907	0.467	0.639	1.08326e-24
B cell	ELOVL6	2.96369e-29	-2.55897	0.014	0.084	1.08474e-24
B cell	IL2RG	3.15591e-29	-0.704723	0.294	0.462	1.15509e-24
B cell	ATP6V0B	3.23849e-29	-0.866074	0.216	0.363	1.18532e-24
B cell	MCF2L2	3.29488e-29	-3.25167	0.009	0.075	1.20596e-24
B cell	MTHFD2	3.49152e-29	-0.741088	0.151	0.293	1.27793e-24
B cell	TCF7L2	3.5138e-29	-2.95996	0.01	0.082	1.28609e-24
B cell	CFD	3.78758e-29	-3.66239	0.008	0.087	1.38629e-24
B cell	GTF2I	3.81928e-29	0.755473	0.403	0.325	1.3979e-24
B cell	FCN1	3.94176e-29	-4.16101	0.011	0.094	1.44272e-24
B cell	MYOF	4.03706e-29	-3.95632	0.006	0.087	1.4776e-24
B cell	WWP1	4.0869e-29	-0.778675	0.171	0.305	1.49585e-24
B cell	TMEM176B	4.12388e-29	-3.7956	0.01	0.099	1.50938e-24
B cell	CNTLN	4.87543e-29	-2.5695	0.008	0.083	1.78446e-24
B cell	CCDC57	4.93302e-29	-1.26437	0.059	0.159	1.80553e-24
B cell	SLC9C1	5.05157e-29	3.44731	0.014	0.002	1.84893e-24
B cell	RAP2B	5.15819e-29	-1.35257	0.051	0.143	1.88795e-24
B cell	SRD5A1	5.6222e-29	1.75015	0.089	0.041	2.05778e-24
B cell	CCDC7	5.81759e-29	-1.35531	0.06	0.145	2.1293e-24
B cell	CDYL	6.98264e-29	1.00373	0.259	0.179	2.55572e-24
B cell	DPYD	7.62685e-29	-0.432091	0.506	0.682	2.7915e-24
B cell	FAM102B	7.921e-29	-1.49163	0.044	0.134	2.89916e-24
B cell	RPL39L	7.99961e-29	-1.9163	0.031	0.116	2.92794e-24
B cell	AC100861.1	8.28038e-29	2.72884	0.019	0.003	3.0307e-24
B cell	CDCA5	8.70574e-29	-4.0713	0.005	0.07	3.18639e-24
B cell	CNPY2	9.00351e-29	-0.766577	0.172	0.318	3.29538e-24
B cell	IL18R1	9.27575e-29	-2.06895	0.023	0.106	3.39502e-24
B cell	BCL7C	9.29815e-29	-0.991861	0.104	0.223	3.40322e-24
B cell	MPC1	9.55643e-29	-1.04823	0.072	0.18	3.49775e-24
B cell	ECT2	9.67961e-29	-2.95888	0.008	0.077	3.54283e-24
B cell	COX7B	1.06896e-28	-0.619094	0.324	0.491	3.91249e-24
B cell	KBTBD8	1.10965e-28	1.97462	0.041	0.014	4.06142e-24
B cell	RIC8B	1.12411e-28	-2.61262	0.016	0.091	4.11437e-24
B cell	NDUFA12	1.19101e-28	-0.723492	0.179	0.319	4.35921e-24
B cell	H2AFX	1.21865e-28	-1.87611	0.028	0.115	4.46039e-24
B cell	MTLN	1.24045e-28	-0.996478	0.09	0.194	4.54015e-24
B cell	FURIN	1.25535e-28	-2.93561	0.01	0.077	4.59469e-24
B cell	TEX9	1.32338e-28	2.14197	0.037	0.008	4.84372e-24
B cell	CYTOR	1.4177e-28	-1.18328	0.075	0.168	5.18893e-24
B cell	GK5	1.57972e-28	-2.40147	0.021	0.092	5.78192e-24
B cell	HMOX2	1.76443e-28	-1.00939	0.099	0.208	6.45798e-24
B cell	SLC43A3	1.7725e-28	-2.06719	0.019	0.099	6.48754e-24
B cell	NDUFB1	1.81078e-28	-0.676279	0.19	0.333	6.62765e-24
B cell	MYO3B	2.06018e-28	2.29387	0.03	0.007	7.54045e-24
B cell	SAC3D1	2.29157e-28	-2.25401	0.022	0.105	8.38738e-24
B cell	NAA38	2.51733e-28	-0.773912	0.166	0.311	9.21367e-24
B cell	SERPING1	2.55128e-28	-3.42795	0.007	0.082	9.33794e-24
B cell	TAB2	2.69311e-28	-0.68347	0.282	0.432	9.85704e-24
B cell	SPRED1	2.70223e-28	-3.63284	0.01	0.094	9.89042e-24
B cell	DIPK1A	2.87577e-28	0.728865	0.407	0.317	1.05256e-23
B cell	GNG11	2.93556e-28	4.71097	0.015	0.001	1.07445e-23
B cell	GCH1	2.98856e-28	-0.8581	0.127	0.26	1.09384e-23
B cell	MPHOSPH6	3.01228e-28	-1.31418	0.048	0.135	1.10252e-23
B cell	PPP3CA	3.09802e-28	0.614271	0.514	0.43	1.13391e-23
B cell	RNF24	3.23194e-28	-1.01764	0.075	0.18	1.18292e-23
B cell	JMJD1C	3.38744e-28	0.528923	0.644	0.593	1.23984e-23
B cell	TMEM173	3.52438e-28	-3.63214	0.005	0.061	1.28996e-23
B cell	SNRPD1	3.66249e-28	-0.655222	0.242	0.404	1.34051e-23
B cell	FAM162A	3.83185e-28	-1.05698	0.1	0.205	1.4025e-23
B cell	IFI27	4.5275e-28	-2.80017	0.057	0.161	1.65711e-23
B cell	ANKRD36	5.01552e-28	-1.18747	0.081	0.186	1.83573e-23
B cell	SDF4	5.69437e-28	-0.946751	0.089	0.205	2.0842e-23
B cell	CDC25B	5.72605e-28	-1.53943	0.03	0.104	2.09579e-23
B cell	SLC5A3	6.42329e-28	-1.23977	0.057	0.15	2.35099e-23
B cell	AC018682.1	6.64318e-28	1.42596	0.1	0.055	2.43147e-23
B cell	RNASEH2B	7.13088e-28	0.767553	0.372	0.294	2.60997e-23
B cell	ULK2	7.53587e-28	-3.98001	0.003	0.061	2.7582e-23
B cell	DYNC1H1	7.67437e-28	-0.631729	0.208	0.357	2.80889e-23
B cell	LAMP3	8.26997e-28	-1.92385	0.027	0.097	3.02689e-23
B cell	EMB	8.69879e-28	-0.553319	0.398	0.548	3.18384e-23
B cell	MAP7D1	8.81494e-28	-1.46763	0.044	0.142	3.22636e-23
B cell	CD274	9.46277e-28	-1.88798	0.028	0.11	3.46347e-23
B cell	NDUFA11	9.81759e-28	-0.540962	0.315	0.496	3.59334e-23
B cell	AL627171.2	1.07969e-27	-1.07861	0.074	0.166	3.95177e-23
B cell	PTGDR	1.14573e-27	-5.55889	0.001	0.056	4.1935e-23
B cell	LMAN1	1.25615e-27	-0.773482	0.151	0.285	4.59763e-23
B cell	CCR5	1.28437e-27	-3.77622	0.005	0.066	4.70092e-23
B cell	SATB1	1.29138e-27	-1.12467	0.089	0.196	4.72658e-23
B cell	CTNNAL1	1.30344e-27	-3.70813	0.006	0.071	4.77073e-23
B cell	RAB27B	1.36024e-27	-4.95134	0.002	0.056	4.97861e-23
B cell	APOBEC3A	1.53651e-27	-3.78282	0.01	0.092	5.62379e-23
B cell	FAM49A	1.54001e-27	1.35113	0.118	0.064	5.6366e-23
B cell	NPL	1.59937e-27	-2.54144	0.01	0.083	5.85385e-23
B cell	TSHZ2	1.73047e-27	-2.11862	0.048	0.14	6.33368e-23
B cell	CDKN3	1.76915e-27	-3.08337	0.008	0.078	6.47527e-23
B cell	MOB3A	1.92258e-27	1.0062	0.262	0.184	7.03684e-23
B cell	PDE4A	1.99704e-27	-2.41864	0.012	0.076	7.30935e-23
B cell	CCDC88A	2.21455e-27	-1.77886	0.028	0.113	8.10548e-23
B cell	NOX3	2.28486e-27	3.99199	0.013	0.002	8.36283e-23
B cell	AL121935.2	2.3585e-27	3.2315	0.012	0.001	8.63234e-23
B cell	ME1	2.3647e-27	-4.02138	0.003	0.066	8.65505e-23
B cell	IFNGR2	2.44228e-27	0.777742	0.248	0.182	8.93898e-23
B cell	RHOQ	2.54559e-27	0.750804	0.18	0.126	9.31711e-23
B cell	MTRNR2L12	2.56872e-27	0.372442	0.84	0.824	9.40178e-23
B cell	ORC6	2.81516e-27	-2.84392	0.012	0.082	1.03038e-22
B cell	TRABD2A	3.04045e-27	-1.93634	0.026	0.098	1.11284e-22
B cell	YEATS4	3.08827e-27	-1.31841	0.062	0.16	1.13034e-22
B cell	RABGAP1	3.08929e-27	0.885994	0.262	0.191	1.13071e-22
B cell	ZDHHC12	3.14864e-27	-0.959735	0.102	0.213	1.15243e-22
B cell	SMG6	3.15924e-27	-0.734585	0.161	0.287	1.15632e-22
B cell	MYBPC2	3.41114e-27	4.89796	0.01	0.001	1.24851e-22
B cell	LINC01625	3.52443e-27	3.95347	0.01	0.001	1.28998e-22
B cell	TRIM13	3.5811e-27	0.86412	0.258	0.188	1.31072e-22
B cell	ABI3	3.73795e-27	-1.4593	0.045	0.128	1.36813e-22
B cell	BID	4.30297e-27	-0.768872	0.153	0.275	1.57493e-22
B cell	LINS1	4.52945e-27	-1.14605	0.074	0.159	1.65782e-22
B cell	AC025569.1	4.63685e-27	3.14896	0.012	0.001	1.69714e-22
B cell	AL133268.4	4.7838e-27	-1.92899	0.029	0.108	1.75092e-22
B cell	SMIM10	4.87635e-27	3.61374	0.012	0.002	1.78479e-22
B cell	AC020656.1	4.94269e-27	-4.16607	0.075	0.187	1.80908e-22
B cell	NPC2	4.94466e-27	0.461213	0.427	0.335	1.80979e-22
B cell	CDT1	5.17511e-27	-3.27285	0.008	0.072	1.89414e-22
B cell	CPT1A	5.26334e-27	-1.82311	0.024	0.093	1.92643e-22
B cell	ZNF101	5.27129e-27	-1.10893	0.089	0.186	1.92934e-22
B cell	FRY	5.28563e-27	-1.41658	0.047	0.133	1.93459e-22
B cell	IFI27L2	5.98744e-27	-0.89993	0.115	0.238	2.19146e-22
B cell	LINC01588	6.06336e-27	0.978513	0.206	0.127	2.21925e-22
B cell	ADCY7	6.15812e-27	-0.713752	0.144	0.265	2.25393e-22
B cell	ARPC3	6.18822e-27	0.351314	0.837	0.79	2.26495e-22
B cell	KPNA5	6.21728e-27	0.818388	0.311	0.221	2.27559e-22
B cell	HIPK2	6.33353e-27	-1.00664	0.112	0.226	2.31813e-22
B cell	AL355076.2	6.41731e-27	1.89534	0.046	0.016	2.3488e-22
B cell	HELB	6.66625e-27	-0.825968	0.165	0.287	2.43992e-22
B cell	MAP3K14	6.87629e-27	1.03466	0.194	0.124	2.51679e-22
B cell	CBX6	7.2114e-27	-1.42146	0.047	0.142	2.63944e-22
B cell	GPCPD1	8.23886e-27	0.544058	0.427	0.347	3.0155e-22
B cell	ARHGAP5	8.75649e-27	0.858442	0.235	0.162	3.20496e-22
B cell	NR4A1	8.84309e-27	2.93069	0.025	0.005	3.23666e-22
B cell	ARID5A	8.94326e-27	-0.978827	0.088	0.188	3.27332e-22
B cell	SIRPA	9.29496e-27	-3.98641	0.004	0.072	3.40205e-22
B cell	ABHD3	1.00883e-26	-0.859977	0.113	0.234	3.69243e-22
B cell	CANX	1.01926e-26	-0.633895	0.241	0.392	3.73058e-22
B cell	REXO2	1.07666e-26	-1.07381	0.088	0.191	3.94068e-22
B cell	TMEM71	1.10508e-26	-1.95799	0.029	0.1	4.0447e-22
B cell	CARD11	1.11281e-26	0.607215	0.49	0.404	4.07298e-22
B cell	ZBTB1	1.12684e-26	-0.586562	0.245	0.387	4.12434e-22
B cell	CD52	1.17286e-26	0.245441	0.767	0.662	4.29277e-22
B cell	HK1	1.17537e-26	-0.813405	0.127	0.243	4.30199e-22
B cell	REPS2	1.18189e-26	3.22884	0.015	0.003	4.32584e-22
B cell	CTSA	1.24416e-26	-1.15685	0.051	0.14	4.55373e-22
B cell	HEATR5B	1.28351e-26	0.899896	0.192	0.128	4.69778e-22
B cell	H3F3B	1.39751e-26	-0.270102	0.896	0.932	5.11502e-22
B cell	AC097717.1	1.55103e-26	3.89708	0.014	0.001	5.67693e-22
B cell	SEC61A1	1.71438e-26	-0.988901	0.068	0.165	6.27478e-22
B cell	LUZP1	1.73378e-26	-0.963567	0.083	0.18	6.34582e-22
B cell	GM2A	1.75674e-26	0.365008	0.18	0.125	6.42985e-22
B cell	RSU1	1.83491e-26	-0.738068	0.163	0.303	6.71596e-22
B cell	MND1	2.17083e-26	-2.89349	0.01	0.072	7.94545e-22
B cell	FOCAD	2.23529e-26	-1.33697	0.043	0.123	8.1814e-22
B cell	RALGDS	2.2674e-26	-1.31961	0.05	0.132	8.29891e-22
B cell	OTULIN	2.29184e-26	-0.939513	0.122	0.244	8.38838e-22
B cell	DDAH1	2.30931e-26	3.26381	0.021	0.003	8.45231e-22
B cell	TAFA1	2.34971e-26	-5.92319	0.001	0.056	8.60018e-22
B cell	PARP8	2.44799e-26	-0.494361	0.468	0.622	8.95989e-22
B cell	RUNDC1	2.47578e-26	1.75182	0.071	0.03	9.06161e-22
B cell	AL162414.1	2.51168e-26	-5.47825	0.001	0.068	9.19299e-22
B cell	LAGE3	2.54592e-26	-1.03679	0.091	0.214	9.31833e-22
B cell	SOCS2	2.5874e-26	-4.62336	0.001	0.053	9.47014e-22
B cell	LIMK2	2.59394e-26	-1.18806	0.056	0.152	9.49408e-22
B cell	ZNF439	2.61588e-26	1.40034	0.08	0.038	9.57437e-22
B cell	BSG	2.80512e-26	-0.968245	0.08	0.19	1.0267e-21
B cell	SMCO4	2.87846e-26	-1.8536	0.026	0.103	1.05355e-21
B cell	TMEM38A	3.0106e-26	3.35504	0.019	0.003	1.10191e-21
B cell	MANBA	3.14162e-26	1.08105	0.209	0.142	1.14986e-21
B cell	CA6	3.17686e-26	-3.24259	0.01	0.068	1.16276e-21
B cell	TPMT	3.30757e-26	-1.52444	0.021	0.092	1.2106e-21
B cell	PDXK	3.31576e-26	-1.18461	0.097	0.217	1.2136e-21
B cell	DOCK4	3.50056e-26	-3.63487	0.022	0.109	1.28124e-21
B cell	ETS1	3.683e-26	-0.560656	0.425	0.565	1.34802e-21
B cell	TM9SF3	4.08436e-26	-0.640775	0.214	0.364	1.49492e-21
B cell	POGLUT3	4.32321e-26	-2.00706	0.017	0.081	1.58234e-21
B cell	GFI1	4.42753e-26	-3.31834	0.006	0.064	1.62052e-21
B cell	OSTC	4.44747e-26	-0.668972	0.182	0.321	1.62782e-21
B cell	ADTRP	4.45211e-26	-3.39912	0.005	0.06	1.62952e-21
B cell	AF117829.1	4.50016e-26	1.10256	0.194	0.121	1.6471e-21
B cell	YWHAB	4.72741e-26	-0.380161	0.597	0.745	1.73028e-21
B cell	MAFB	4.87288e-26	-8.45921	0	0.062	1.78352e-21
B cell	NQO2	4.89465e-26	-1.00491	0.06	0.156	1.79149e-21
B cell	FAM167A	5.10077e-26	2.58307	0.026	0.006	1.86693e-21
B cell	TTTY10	5.60505e-26	1.61055	0.051	0.019	2.0515e-21
B cell	ZCCHC14	5.82207e-26	-2.62631	0.014	0.076	2.13094e-21
B cell	SGPP1	5.93757e-26	1.13949	0.144	0.089	2.17321e-21
B cell	PLEKHG3	6.05822e-26	-3.63461	0.004	0.056	2.21737e-21
B cell	FUCA1	6.46692e-26	-2.89549	0.035	0.13	2.36696e-21
B cell	M6PR	6.62441e-26	-0.690454	0.173	0.304	2.4246e-21
B cell	TBCB	6.72997e-26	-0.824483	0.129	0.239	2.46323e-21
B cell	IL12RB2	6.85293e-26	-2.41046	0.029	0.109	2.50824e-21
B cell	SSR2	7.85863e-26	-0.58168	0.281	0.429	2.87634e-21
B cell	TSHZ3	8.4487e-26	-8.19913	0	0.059	3.09231e-21
B cell	MALT1	9.29461e-26	0.698488	0.36	0.292	3.40192e-21
B cell	FLNB	9.46952e-26	1.35931	0.092	0.043	3.46594e-21
B cell	GPR135	9.55811e-26	1.64334	0.043	0.017	3.49837e-21
B cell	DCAF12	9.59168e-26	-3.18141	0.008	0.063	3.51065e-21
B cell	NDC80	9.76452e-26	-2.98078	0.01	0.081	3.57391e-21
B cell	VSIR	1.01125e-25	-1.3491	0.033	0.108	3.70127e-21
B cell	ELK3	1.01609e-25	0.733162	0.342	0.257	3.71899e-21
B cell	MBNL3	1.06351e-25	1.01709	0.202	0.13	3.89255e-21
B cell	CHIT1	1.22798e-25	3.44426	0.012	0.002	4.49454e-21
B cell	NDUFB3	1.27638e-25	-0.704097	0.197	0.35	4.67168e-21
B cell	MOB1A	1.32567e-25	0.58169	0.478	0.413	4.85209e-21
B cell	SLBP	1.33379e-25	-0.873314	0.116	0.229	4.88179e-21
B cell	PSMA5	1.40187e-25	-0.509791	0.357	0.52	5.13098e-21
B cell	AC067945.4	1.53458e-25	-2.00951	0.019	0.083	5.61673e-21
B cell	CDC45	1.54121e-25	-3.23712	0.005	0.06	5.64099e-21
B cell	RERE-AS1	1.56144e-25	2.03063	0.035	0.011	5.71504e-21
B cell	CD320	1.5773e-25	-1.57094	0.035	0.116	5.77309e-21
B cell	MYO1G	1.61398e-25	-0.87165	0.107	0.215	5.90734e-21
B cell	PRKAR2A	1.66435e-25	-0.86379	0.093	0.191	6.09168e-21
B cell	NCR1	1.86433e-25	-5.98075	0.001	0.054	6.82363e-21
B cell	KIF1B	1.86707e-25	-1.38258	0.045	0.133	6.83368e-21
B cell	NUB1	1.8852e-25	0.537046	0.456	0.385	6.90001e-21
B cell	RAB33A	2.04973e-25	-4.24486	0.005	0.064	7.50223e-21
B cell	RFC4	2.0568e-25	-1.49334	0.036	0.121	7.52809e-21
B cell	PGAM1	2.06149e-25	-0.783459	0.122	0.234	7.54525e-21
B cell	GTSE1	2.07285e-25	-5.60921	0.001	0.057	7.58684e-21
B cell	AC090772.2	2.10758e-25	-1.13997	0.077	0.17	7.71396e-21
B cell	LINC02325	2.15145e-25	-3.30963	0.007	0.057	7.87452e-21
B cell	KIAA1671	2.16089e-25	-4.72047	0.003	0.062	7.90906e-21
B cell	AURKAIP1	2.19305e-25	-0.570485	0.283	0.453	8.02678e-21
B cell	LRIG1	2.22566e-25	-1.73531	0.037	0.123	8.14615e-21
B cell	DTYMK	2.37889e-25	-1.17674	0.069	0.165	8.70697e-21
B cell	CCL4L2	2.48908e-25	-0.658506	0.018	0.085	9.11027e-21
B cell	FNBP1L	2.5112e-25	2.43445	0.033	0.009	9.19125e-21
B cell	SEC13	2.61879e-25	-0.738907	0.151	0.275	9.58505e-21
B cell	GCLM	2.71739e-25	-0.882201	0.089	0.19	9.94591e-21
B cell	CEP78	2.72699e-25	-1.67245	0.031	0.107	9.98104e-21
B cell	LTA4H	2.76949e-25	1.12895	0.162	0.109	1.01366e-20
B cell	PCYT1A	2.82402e-25	-1.07209	0.089	0.188	1.03362e-20
B cell	IER3IP1	2.90732e-25	-0.750923	0.114	0.232	1.06411e-20
B cell	RPL7A	2.91074e-25	0.209807	0.997	0.994	1.06536e-20
B cell	TMOD3	3.00273e-25	-0.529307	0.286	0.435	1.09903e-20
B cell	LINC01237	3.10283e-25	1.42792	0.097	0.043	1.13567e-20
B cell	ATRX	3.18815e-25	0.549279	0.514	0.448	1.16689e-20
B cell	PPP3CC	3.28267e-25	0.652512	0.438	0.362	1.20149e-20
B cell	MITF	3.35896e-25	-4.43591	0.003	0.068	1.22941e-20
B cell	DDAH2	3.45514e-25	1.39294	0.097	0.052	1.26462e-20
B cell	SH3KBP1	3.81059e-25	-0.581167	0.286	0.432	1.39471e-20
B cell	CDC7	3.89715e-25	-2.52736	0.01	0.074	1.4264e-20
B cell	PDGFD	3.90494e-25	-3.85305	0.006	0.063	1.42925e-20
B cell	TALDO1	3.94715e-25	0.644141	0.533	0.463	1.4447e-20
B cell	DISP1	3.95558e-25	1.35408	0.086	0.042	1.44778e-20
B cell	TACC1	3.97622e-25	-0.646193	0.175	0.309	1.45534e-20
B cell	IRF2	4.0124e-25	0.592471	0.44	0.36	1.46858e-20
B cell	GPM6B	4.28215e-25	1.353	0.102	0.047	1.56731e-20
B cell	B4GALT5	4.46521e-25	-1.08547	0.106	0.22	1.63431e-20
B cell	FAM53B	4.86925e-25	0.764883	0.278	0.201	1.78219e-20
B cell	PASK	5.21775e-25	-1.91064	0.03	0.097	1.90975e-20
B cell	NFIX	5.46802e-25	2.14025	0.042	0.014	2.00135e-20
B cell	WNK1	5.58813e-25	-0.559803	0.252	0.401	2.04531e-20
B cell	KCNMA1	5.75885e-25	-3.50022	0.019	0.102	2.1078e-20
B cell	DNAJC5	5.88916e-25	-1.05036	0.085	0.194	2.15549e-20
B cell	DNA2	6.09397e-25	-3.06342	0.008	0.07	2.23045e-20
B cell	MAN1A1	6.19834e-25	1.05018	0.269	0.189	2.26866e-20
B cell	SLAMF8	6.21056e-25	-3.14605	0.008	0.079	2.27313e-20
B cell	ODF3B	6.27062e-25	1.25163	0.131	0.077	2.29511e-20
B cell	NAB1	6.67919e-25	-1.35247	0.03	0.105	2.44465e-20
B cell	DENND10	7.44962e-25	-1.5477	0.032	0.105	2.72663e-20
B cell	CMKLR1	7.62193e-25	-3.64734	0.005	0.067	2.7897e-20
B cell	TCTEX1D2	7.94707e-25	-1.23964	0.046	0.125	2.90871e-20
B cell	PCSK5	8.13663e-25	-3.47991	0.006	0.061	2.97809e-20
B cell	HDGF	8.16909e-25	-0.813408	0.073	0.167	2.98997e-20
B cell	CNTNAP2	8.38516e-25	2.45526	0.024	0.006	3.06905e-20
B cell	CNFN	8.63497e-25	3.37722	0.013	0.001	3.16048e-20
B cell	ALCAM	9.39788e-25	1.10947	0.131	0.083	3.43972e-20
B cell	NECAP2	9.54422e-25	-0.657314	0.126	0.237	3.49328e-20
B cell	TPGS2	9.78606e-25	-1.1155	0.068	0.162	3.5818e-20
B cell	CMTM8	9.91259e-25	-2.85232	0.012	0.073	3.62811e-20
B cell	AQP3	1.00291e-24	-5.99547	0.001	0.049	3.67075e-20
B cell	CLIC3	1.00422e-24	-2.21396	0.016	0.082	3.67555e-20
B cell	AL645568.1	1.00662e-24	-1.05337	0.062	0.149	3.68433e-20
B cell	LNPK	1.02968e-24	-1.10653	0.051	0.133	3.76874e-20
B cell	BLVRB	1.13981e-24	-1.24506	0.079	0.187	4.1718e-20
B cell	AKAP11	1.1579e-24	0.823298	0.187	0.136	4.23804e-20
B cell	JMJD6	1.17233e-24	-1.24594	0.058	0.15	4.29086e-20
B cell	RUFY3	1.18117e-24	1.07308	0.197	0.13	4.32319e-20
B cell	ATP5ME	1.21422e-24	-0.614913	0.233	0.377	4.44417e-20
B cell	ATOX1	1.2186e-24	-1.42563	0.192	0.32	4.4602e-20
B cell	ZNF831	1.28768e-24	-1.72787	0.033	0.101	4.71304e-20
B cell	NEDD4	1.54071e-24	-4.42181	0.003	0.057	5.63916e-20
B cell	HERC1	1.58284e-24	-0.627882	0.278	0.436	5.79335e-20
B cell	TWF2	1.62266e-24	-0.859141	0.124	0.233	5.93911e-20
B cell	DNPH1	1.67838e-24	-0.594617	0.176	0.311	6.14305e-20
B cell	ANXA6	1.71555e-24	0.759893	0.308	0.236	6.27909e-20
[truncated: 61,166 more rows]
