# Supplementary material for: InTraSeq: A Multimodal Assay that Uncovers New Single-Cell Biology and Regulatory Mechanisms
Source: Research Square preprint supplement (doi:10.21203/rs.3.rs-5284652/v1), 2024-12-09
Supplement: Supplementary file 8 [file e1e6a066741bff7041aab914.xlsx]

## Sheet: Sheet 1
protein	cluster	p_val	avg_log2FC	pct.1	pct.2	p_val_adj
p-NF-κB-Ser536	0	0	0.346552	0.863	0.732	0
p-H3-Ser10	0	0	0.887368	0.996	0.941	0
Aiolos	0	0	-0.596795	0.724	0.769	0
p-GR-Ser226	0	0	0.547868	0.996	0.955	0
p-STAT1-Ser727	0	0	0.2659	0.991	0.962	0
GR	0	0	0.218081	0.997	0.973	0
TCF-7	0	0	0.203769	0.999	0.992	0
p-CREB-1-Ser133	0	0	0.222192	1	0.996	0
CREB-1	0	0	0.162527	1	0.999	0
p-4E-BP1-Thr37/46	0	0	-0.40473	0.749	0.748	0
Ikaros	0	0	-0.130312	1	0.999	0
p-S6-Ser235/236	0	0	-0.460562	0.99	0.991	0
H3K27Ac	0	0	-0.117676	1	1	0
p-MAPK-ERK1/2-Thr202/Tyr204	0	5.54213e-306	0.76394	0.517	0.403	1.71806e-304
GAPDH	0	5.88806e-197	-0.10099	0.999	0.999	1.8253e-195
CHD-1	0	4.57976e-173	-0.159147	0.929	0.902	1.41973e-171
p-Akt-Ser473	0	5.6179e-120	0.182178	0.814	0.735	1.74155e-118
p-STAT3-Ser727	0	2.014e-101	-0.109441	0.968	0.972	6.24339e-100
p-STAT3-Tyr705	1	0	0.757044	0.823	0.452	0
p-NF-κB-Ser536	1	0	-0.918229	0.713	0.793	0
p-STAT3-Ser727	1	0	0.462404	0.996	0.967	0
p-S6-Ser235/236	1	0	0.351209	0.998	0.989	0
BATF	1	0	0.231399	0.999	0.991	0
NFAT1	1	0	-0.329332	0.99	0.982	0
Vimentin	1	0	0.253539	0.998	0.991	0
Histone H3	1	0	0.215684	1	1	0
H3K27Ac	1	0	0.15903	1	1	0
Ikaros	1	0	0.233487	1	1	0
p-H3-Ser10	1	2.03612e-297	-0.396307	0.986	0.96	6.31199e-296
CREB-1	1	2.388e-216	-0.130367	1	0.999	7.40281e-215
GAPDH	1	5.93257e-214	0.117033	1	0.999	1.8391e-212
p-GR-Ser226	1	3.68593e-203	-0.205991	0.987	0.969	1.14264e-201
p-Akt-Ser473	1	8.93899e-196	-0.425747	0.735	0.77	2.77109e-194
GR	1	4.21822e-145	-0.141222	0.993	0.981	1.30765e-143
FOXO1	1	9.9057e-130	0.102275	0.999	0.997	3.07077e-128
p-STAT1-Ser727	1	1.11739e-125	-0.198474	0.982	0.972	3.4639e-124
MAPK-ERK1/2	1	1.60427e-102	-0.15822	0.978	0.967	4.97324e-101
p-Jun-Ser73	1	2.93173e-76	-0.205904	0.872	0.865	9.08838e-75
p-MAPK-ERK1/2-Thr202/Tyr204	1	1.72462e-66	-0.677727	0.41	0.453	5.34633e-65
CHD-1	1	3.9952e-55	-0.166356	0.919	0.911	1.23851e-53
p-4E-BP1-Thr37/46	1	2.16009e-07	-0.130792	0.78	0.744	6.69628e-06
p-STAT3-Tyr705	2	0	0.472081	0.716	0.467	0
p-NF-κB-Ser536	2	0	-1.09001	0.566	0.811	0
p-4E-BP1-Thr37/46	2	0	-0.669437	0.547	0.774	0
p-Akt-Ser473	2	0	-0.655563	0.569	0.791	0
MAPK-ERK1/2	2	0	-0.45399	0.894	0.977	0
GR	2	0	-0.383386	0.932	0.989	0
p-GR-Ser226	2	0	-0.372847	0.929	0.976	0
NFAT1	2	0	-0.519665	0.942	0.988	0
Akt	2	0	-0.584608	0.954	0.996	0
BATF	2	0	-0.381948	0.957	0.996	0
NF-κB	2	0	-0.182152	0.997	1	0
GAPDH	2	0	0.216693	0.998	0.999	0
Histone H3	2	0	0.258809	1	1	0
H3K27me3	2	0	0.285207	1	1	0
Ikaros	2	0	0.243742	1	1	0
S6	2	1.17563e-251	-0.120106	0.999	1	3.64445e-250
p-Jun-Ser73	2	3.36596e-242	-0.392331	0.731	0.883	1.04345e-240
p-S6-Ser235/236	2	3.59557e-210	-0.28425	0.981	0.991	1.11463e-208
p-H3-Ser10	2	6.34842e-202	-0.320225	0.962	0.963	1.96801e-200
CHD-1	2	1.53488e-173	-0.303182	0.803	0.926	4.75814e-172
p-MAPK-ERK1/2-Thr202/Tyr204	2	1.34026e-149	-0.714098	0.314	0.465	4.1548e-148
Aiolos	2	5.95246e-140	-0.41244	0.621	0.768	1.84526e-138
STAT1	2	8.10864e-105	0.147854	0.974	0.982	2.51368e-103
p-STAT3-Ser727	2	2.41547e-95	0.139939	0.979	0.969	7.48797e-94
p-H3-Ser10	3	0	-1.79254	0.808	0.977	0
p-GR-Ser226	3	0	-0.822547	0.871	0.98	0
p-STAT1-Ser727	3	0	-0.722856	0.886	0.981	0
p-4E-BP1-Thr37/46	3	0	0.771867	0.83	0.741	0
Aiolos	3	0	0.613861	0.814	0.746	0
GR	3	0	-0.290724	0.946	0.986	0
Vimentin	3	0	-0.486857	0.962	0.994	0
FOXO1	3	0	-0.358964	0.979	0.999	0
p-CREB-1-Ser133	3	0	-0.49762	0.984	0.999	0
NFAT1	3	0	0.587307	0.99	0.982	0
Ikaros	3	0	-0.215545	0.996	1	0
Akt	3	0	0.491237	0.994	0.991	0
NF-κB	3	0	0.165978	1	0.999	0
BATF	3	0	0.445066	0.992	0.992	0
Histone H3	3	0	-0.268397	1	1	0
TCF-7	3	6.32592e-253	-0.234114	0.973	0.997	1.96103e-251
p-STAT3-Tyr705	3	8.97589e-214	0.492326	0.683	0.478	2.78253e-212
MAPK-ERK1/2	3	1.53767e-196	0.231481	0.961	0.969	4.76678e-195
p-NF-κB-Ser536	3	4.96755e-137	0.363372	0.807	0.781	1.53994e-135
CREB-1	3	7.67049e-95	-0.117365	0.995	1	2.37785e-93
CHD-1	3	3.46311e-90	0.21004	0.876	0.915	1.07356e-88
p-STAT3-Ser727	3	1.5983e-77	-0.181987	0.938	0.973	4.95473e-76
STAT1	3	5.64781e-72	-0.151507	0.942	0.985	1.75082e-70
p-MAPK-ERK1/2-Thr202/Tyr204	3	4.05614e-49	-0.428657	0.347	0.457	1.2574e-47
p-Akt-Ser473	3	4.38235e-29	0.196788	0.735	0.769	1.35853e-27
p-Jun-Ser73	3	1.44083e-21	-0.123295	0.776	0.874	4.46656e-20
p-STAT3-Tyr705	4	0	-2.82921	0.149	0.518	0
p-S6-Ser235/236	4	0	0.538524	0.999	0.99	0
H3K27me3	4	0	-0.215056	1	1	0
Ikaros	4	0	0.17986	1	1	0
S6	4	0	0.193465	1	1	0
Histone H3	4	1.33121e-273	0.158829	1	1	4.12675e-272
p-Jun-Ser73	4	4.64849e-168	0.342756	0.94	0.861	1.44103e-166
CREB-1	4	1.89212e-146	0.119174	1	0.999	5.86557e-145
p-STAT3-Ser727	4	4.32842e-88	-0.20714	0.973	0.97	1.34181e-86
NFAT1	4	1.18664e-79	-0.211439	0.992	0.982	3.67859e-78
Vimentin	4	1.08202e-76	0.161161	0.998	0.991	3.35425e-75
p-NF-κB-Ser536	4	2.7638e-74	-0.474096	0.77	0.784	8.56779e-73
STAT1	4	8.33496e-33	-0.105254	0.986	0.981	2.58384e-31
p-Akt-Ser473	4	1.51659e-28	-0.223519	0.757	0.766	4.70144e-27
Aiolos	4	1.92147e-22	0.130683	0.809	0.748	5.95656e-21
p-STAT3-Tyr705	5	0	-2.703	0.197	0.515	0
Aiolos	5	0	1.08352	0.957	0.739	0
p-4E-BP1-Thr37/46	5	0	0.797063	0.935	0.736	0
p-NF-κB-Ser536	5	0	1.19516	0.947	0.773	0
MAPK-ERK1/2	5	0	0.416359	0.997	0.966	0
p-STAT3-Ser727	5	0	-0.489772	0.947	0.972	0
NFAT1	5	0	0.731295	1	0.982	0
GR	5	0	0.367677	0.999	0.981	0
Akt	5	0	0.444169	1	0.991	0
p-H3-Ser10	5	0	-1.23671	0.958	0.963	0
p-STAT1-Ser727	5	0	-0.648921	0.97	0.973	0
FOXO1	5	0	-0.441951	0.998	0.997	0
NF-κB	5	0	0.351464	1	0.999	0
p-CREB-1-Ser133	5	0	-0.385598	0.998	0.998	0
Histone H3	5	0	-0.169071	1	1	0
H3K27Ac	5	0	0.193588	1	1	0
CHD-1	5	1.59906e-219	0.343354	0.973	0.908	4.9571e-218
TCF-7	5	2.17628e-193	-0.211744	0.996	0.995	6.74646e-192
p-GR-Ser226	5	1.47367e-144	-0.237891	0.985	0.97	4.56839e-143
p-Akt-Ser473	5	3.48861e-82	0.290519	0.87	0.759	1.08147e-80
Vimentin	5	6.99279e-56	-0.148773	0.995	0.991	2.16776e-54
p-MAPK-ERK1/2-Thr202/Tyr204	5	1.17825e-39	-0.681517	0.403	0.45	3.65257e-38
p-Jun-Ser73	5	1.16764e-32	0.135063	0.93	0.861	3.61968e-31
p-STAT3-Tyr705	6	0	-3.79594	0.076	0.522	0
p-NF-κB-Ser536	6	0	-1.20337	0.55	0.798	0
NFAT1	6	0	-1.05801	0.902	0.988	0
MAPK-ERK1/2	6	0	-0.444511	0.921	0.971	0
p-H3-Ser10	6	0	0.544909	0.998	0.961	0
p-STAT1-Ser727	6	0	0.792479	0.998	0.972	0
Akt	6	0	-0.637561	0.971	0.992	0
BATF	6	0	-0.501681	0.976	0.993	0
GR	6	0	-0.368035	0.968	0.983	0
p-S6-Ser235/236	6	0	0.729671	1	0.99	0
CREB-1	6	0	-0.260521	1	0.999	0
p-CREB-1-Ser133	6	0	0.53453	0.999	0.998	0
NF-κB	6	0	-0.16726	1	0.999	0
S6	6	0	-0.343974	1	1	0
p-MAPK-ERK1/2-Thr202/Tyr204	6	2.72763e-188	0.682547	0.587	0.439	8.45565e-187
Histone H3	6	3.24701e-177	0.122166	1	1	1.00657e-175
p-Jun-Ser73	6	6.0291e-166	-0.443906	0.737	0.874	1.86902e-164
Aiolos	6	2.78486e-160	-0.624288	0.583	0.762	8.63307e-159
GAPDH	6	8.9646e-134	0.119997	0.999	0.999	2.77903e-132
TCF-7	6	2.04111e-129	-0.177769	0.994	0.995	6.32745e-128
p-4E-BP1-Thr37/46	6	9.44835e-119	-0.501884	0.579	0.759	2.92899e-117
p-Akt-Ser473	6	1.57093e-97	0.347937	0.8	0.764	4.86989e-96
Vimentin	6	2.18867e-56	-0.157635	0.988	0.992	6.78488e-55
CHD-1	6	1.09301e-37	-0.180875	0.864	0.915	3.38833e-36
p-STAT3-Ser727	6	1.93204e-23	-0.111739	0.97	0.97	5.98932e-22
p-STAT3-Tyr705	7	0	-2.46879	0.181	0.515	0
TCF-7	7	0	0.270698	0.999	0.994	0
FOXO1	7	0	0.32748	1	0.997	0
H3K27me3	7	0	-0.160824	1	1	0
CHD-1	7	2.60198e-239	0.390209	0.968	0.909	8.06613e-238
p-Jun-Ser73	7	8.07536e-224	0.421387	0.943	0.861	2.50336e-222
S6	7	1.78729e-173	0.123537	1	1	5.54061e-172
GR	7	1.22289e-149	0.194321	0.994	0.981	3.79095e-148
GAPDH	7	6.21101e-126	-0.151394	0.999	0.999	1.92541e-124
p-GR-Ser226	7	1.53034e-97	0.184897	0.991	0.97	4.74406e-96
p-STAT3-Ser727	7	3.99801e-88	-0.207191	0.967	0.97	1.23938e-86
MAPK-ERK1/2	7	2.06163e-78	0.168817	0.984	0.967	6.39106e-77
NFAT1	7	7.88915e-51	-0.175454	0.991	0.983	2.44564e-49
p-H3-Ser10	7	9.52403e-39	0.14957	0.991	0.961	2.95245e-37
Vimentin	7	4.31427e-26	0.107689	0.994	0.991	1.33743e-24
p-4E-BP1-Thr37/46	7	6.59083e-21	-0.225451	0.73	0.749	2.04316e-19
p-NF-κB-Ser536	7	1.55065e-12	-0.251491	0.796	0.783	4.80701e-11
p-MAPK-ERK1/2-Thr202/Tyr204	7	1.7943e-08	-0.382675	0.43	0.449	5.56232e-07
p-STAT3-Tyr705	8	0	1.20091	0.859	0.474	0
p-4E-BP1-Thr37/46	8	0	0.905078	0.898	0.739	0
Aiolos	8	0	0.831097	0.891	0.744	0
p-H3-Ser10	8	0	-1.94368	0.825	0.971	0
p-STAT1-Ser727	8	0	-0.60578	0.932	0.976	0
p-GR-Ser226	8	0	-0.646267	0.933	0.973	0
NFAT1	8	0	0.700199	1	0.982	0
p-STAT3-Ser727	8	0	0.385203	0.986	0.969	0
Akt	8	0	0.538868	1	0.991	0
TCF-7	8	0	-0.407329	0.986	0.995	0
p-CREB-1-Ser133	8	0	-0.569978	0.991	0.998	0
NF-κB	8	0	0.241821	1	0.999	0
CREB-1	8	0	-0.414438	0.999	0.999	0
Histone H3	8	0	-0.331028	1	1	0
H3K27me3	8	0	-0.128748	1	1	0
Ikaros	8	0	-0.405445	1	1	0
MAPK-ERK1/2	8	4.13506e-280	0.328563	0.986	0.967	1.28187e-278
CHD-1	8	4.03869e-233	0.394544	0.944	0.91	1.25199e-231
Vimentin	8	1.10761e-216	-0.3221	0.989	0.992	3.4336e-215
BATF	8	6.7992e-187	0.216629	0.996	0.991	2.10775e-185
FOXO1	8	3.11889e-136	-0.165763	0.997	0.997	9.66856e-135
p-NF-κB-Ser536	8	2.98356e-132	0.441519	0.852	0.779	9.24903e-131
p-Akt-Ser473	8	2.63406e-32	0.204721	0.783	0.765	8.16559e-31
p-Jun-Ser73	8	2.70216e-31	0.16481	0.879	0.865	8.37669e-30
p-MAPK-ERK1/2-Thr202/Tyr204	8	2.11757e-23	-0.440684	0.369	0.452	6.56447e-22
